# Supplementary material for: Cycloisomerization of enynones by aluminum halides: construction of bicyclo[3.1.0]hexanes by introducing halides
Source: Royal Society of Chemistry journal article supplement (doi:10.1039/d2qo01845d), 2022-12-30

## Supporting Information

### Skeletal Rearrangement of Enynones by Aluminum Halides: Construction of Bicyclo[3.1.0]hexanes with Introducing Halides

Daisuke Sato,<sup>[a]</sup> Akira Tsubouchi,<sup>[a]</sup> Yuichiro Watanabe,<sup>[b]</sup> Keiichi Noguchi,<sup>[c]</sup> Kazunori Miyamoto,<sup>[b]</sup> Masanobu Uchiyama<sup>[b,d]</sup> and Akio Saito\*<sup>[a]</sup>

<sup>[a]</sup> Division of Applied Chemistry, Institute of Engineering, Tokyo University of Agriculture and Technology, Koganei, Tokyo 184-8588, Japan

<sup>[b]</sup> Graduate School of Pharmaceutical Sciences, The University of Tokyo, Bunkyo-ku, Tokyo 113-0033, Japan

<sup>[c]</sup> Instrumentation Analysis Center, Tokyo University of Agriculture and Technology, Koganei, Tokyo 184-8588, Japan

<sup>[d]</sup> Research Initiative for Supra-Materials (RISM), Shinshu University, 3-15-1 Tokida, Ueda, Nagano 386-8567, Japan

\* Correspondence: akio-sai@cc.tuat.ac.jp

## **Table of Contents**

1. Evaluation of Solvents for the  $\text{AlCl}_3$ -Mediated Formation of **2a** (Table S1).....S2
2. General Information.....S2
3. Skeletal Rearrangement of **1a-l** using  $\text{Et}_n\text{AlCl}_{(3-n)}$  and Characterization of **2a-l** and *cis*-**2a**.....S2
4. Ene-type Reaction of **1m** and **1n** using  $\text{Et}_n\text{AlCl}_{(3-n)}$  and Characterization of **4m** and **4n**.....S7
5. Skeletal Rearrangement of **1a** using  $\text{Me}_n\text{AlX}_{(3-n)}$  and Characterization of **5** and **7**.....S7
6. Quenching of Aluminum Enolate with Electrophiles and Characterization of **d-2a**, **8** and **9**.....S8
7. NOESY Spectra Analysis of *cis*-**2a** and **4m**.....S10
8. X-ray structure of **2a** (Figures S1 and S2).....S13
9. Computational Details.....S13
10. Cartesian Coordinates and Absolute Electronic Energies of Intermediates and Transition States.....S14
11.  $^1\text{H}$  and  $^{13}\text{C}$  NMR Spectra of Compounds **2a-2l**, **4m**, **4n**, **5**, **6** and **d-2a**.....S18

## 1. Evaluation of Solvents for the AlCl<sub>3</sub>-Mediated Formation of 2a

**Table S1.** Evaluation of Solvents for the AlCl<sub>3</sub>-Mediated Formation of 2a

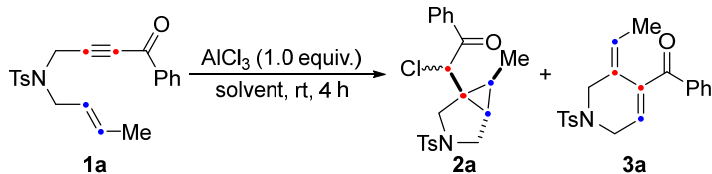

| entry | Solvent                              | 2a [%]            | dr <sup>[a]</sup> | 3a [%] | 1a <sup>[b]</sup> [%] |
|-------|--------------------------------------|-------------------|-------------------|--------|-----------------------|
| 1     | CH <sub>2</sub> Cl <sub>2</sub>      | 78                | 60:40             | trace  | 0                     |
| 2     | CH <sub>2</sub> Br <sub>2</sub>      | 53                | 59:41             | 0      | 0                     |
| 3     | ClCH <sub>2</sub> CH <sub>2</sub> Cl | 62                | 57:43             | trace  | 0                     |
| 4     | CHCl <sub>3</sub>                    | 65                | 60:40             | trace  | 0                     |
| 5     | CCl <sub>4</sub>                     | 40 <sup>[b]</sup> | 60:40             | 0      | 0                     |
| 6     | toluene                              | 35                | 60:40             | trace  | 0                     |
| 7     | CH <sub>3</sub> NO <sub>2</sub>      | 20                | 65:35             | 19     | 0                     |
| 8     | CH <sub>3</sub> CN                   | 47                | 59:41             | trace  | 0 <sup>[c]</sup>      |
| 9     | THF                                  | 0                 | -                 | 0      | 96                    |

<sup>[a]</sup> Diastereomeric ratio. <sup>[b]</sup> Determined by <sup>1</sup>H NMR analysis using AcOMe as an internal standard.

<sup>[c]</sup> (*Z*)-isomer of **1a**: 7%.

## 2. General Information

All reactions were carried out under an argon atmosphere. 7-En-2-ynones **1a-n** and *Z*-**1a** were prepared by the method reported in the literatures.<sup>1</sup> Unless otherwise noted, materials and catalysts are commercially available. All solvents were purchased as the “anhydrous” and used without further purification. For the thin-layer chromatography (TLC) analysis, Merck precoated TLC plates (silica gel 60 F254) were used. Column chromatography was performed on silica gel 60N (63–200 μm, neutral, Kanto Kagaku Co., Ltd.). Medium pressure liquid chromatography (MPLC) was carried out with YAMAZEN EPCLC-Wprep 2XY.

<sup>1</sup>H and <sup>13</sup>C NMR spectra were measured at 500 and 125 MHz in CDCl<sub>3</sub> and the chemical shifts are given in ppm using CHCl<sub>3</sub> (7.26 ppm) in CDCl<sub>3</sub> for <sup>1</sup>H NMR and CDCl<sub>3</sub> (77.0 ppm) for <sup>13</sup>C NMR as an internal standard, respectively. Splitting patterns of an apparent multiplet associated with an averaged coupling constant were designed as s (singlet), d (doublet), t (triplet), q (quartet), m (multiplet), and br (broadened). Mass spectra and HRMS were recorded on double-focusing magnetic sector by FAB or ESI methods.

## 3. Skeletal Rearrangement of 1a-l using Et<sub>n</sub>AlCl<sub>(3-n)</sub> and Characterization of 2a-l and cis-2a

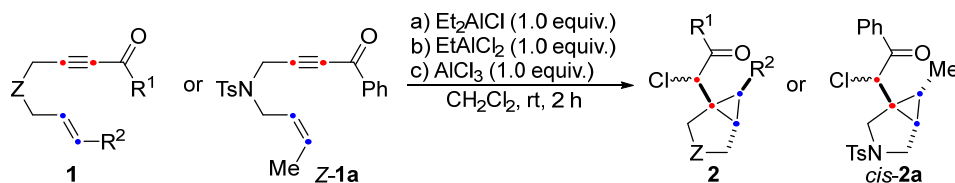

To a solution of enynones **1a-l** (0.4 mmol) or *Z*-**1a** (147.0 mg, 0.4 mmol) in CH<sub>2</sub>Cl<sub>2</sub> (2 mL) was added Et<sub>2</sub>AlCl (1.0 M in hexane solution, 0.4 mL, 0.4 mmol, method **a**), EtAlCl<sub>2</sub> (1.0 M in hexane solution, 0.4 mL, 0.4 mmol, method **b**) or AlCl<sub>3</sub> (53.3 mg, 0.4 mmol, method **c**) at 0 °C. After being stirred at room temperature until the consumption of **1** (by TLC analysis), the reaction mixture was quenched with sat. NaHCO<sub>3</sub> and sat. Rochelle salt, and extracted with AcOEt. The organic layer was dried over MgSO<sub>4</sub> and concentrated in vacuo to dryness. The residue was purified by MPLC (hexane:AcOEt = 92:8 to 75:25) to give **2a-**

<sup>1</sup> D. Sato, Y. Watanabe, K. Noguchi, J. Kanazawa, K. Miyamoto, M. Uchiyama, A. Saito, *Org. Lett.* **2020**, *22*, 4063–4067.

1 or *cis*-**2a** as an epimeric mixture. In cases of **2a**, **2b**, **2e**, **2g** and **2i-k**, since major epimer-rich and/or minor epimer-rich products were separated, yields were determined by adding these products together.

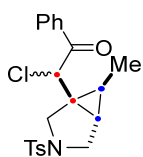

**2-Chloro-2-[(1S\*,5S\*,6S\*)-6-methyl-3-tosyl-3-azabicyclo[3.1.0]hexan-1-yl]-1-phenylethan-1-one (2a):** (a) 151.7 mg (94%, 56:44), (b) 143.0 mg (89%, 56:44), (c) 126.0 mg (78%, 60:40). [major]  $R_f = 0.41$  (hexane:AcOEt = 2:1). White solid. Mp 178-179 °C. IR (KBr)  $\nu$   $\text{cm}^{-1}$ ; 1685, 1596, 1342, 1163, 667, 598, 549.  $^1\text{H}$  NMR (500 MHz,  $\text{CDCl}_3$ )  $\delta$  ppm; 7.92 (d,  $J = 7.5$  Hz, 2H), 7.72 (d,  $J = 8.0$  Hz, 2H), 7.61 (t,  $J = 7.5$  Hz, 1H), 7.49 (dd,  $J = 7.5, 7.5$  Hz, 2H), 7.32 (d,  $J = 8.0$  Hz, 2H), 5.07 (s, 1H), 3.90 (d,  $J = 9.7$  Hz, 1H), 3.56 (d,  $J = 9.7$  Hz, 1H), 3.54 (d,  $J = 9.7$  Hz, 1H), 3.15 (dd,  $J = 9.7, 3.4$  Hz, 1H), 2.43 (s, 3H), 1.35-1.29 (m, 2H), 1.02 (d,  $J = 5.7$  Hz, 3H).  $^{13}\text{C}$ -NMR (125 MHz,  $\text{CDCl}_3$ )  $\delta$  ppm; 192.4, 143.4, 134.0, 133.8, 133.7, 129.6, 128.9, 127.5, 58.5, 50.2, 49.2, 33.5, 30.8, 23.2, 21.5, 12.5 (note that two carbon peaks overlap with each other). HRMS (ESI,  $m/z$ ): calcd. for  $\text{C}_{21}\text{H}_{23}\text{ClNO}_3\text{S}^+$  [ $M + \text{H}$ ] $^+$ , 404.1082; found, 404.1084. [minor]  $R_f = 0.38$  (hexane:AcOEt = 2:1). Pale yellow solid. Mp 148-149 °C. IR (KBr)  $\nu$   $\text{cm}^{-1}$ ; 1697, 1598, 1337, 1165, 668, 606, 551.  $^1\text{H}$  NMR (500 MHz,  $\text{CDCl}_3$ )  $\delta$  ppm; 7.64 (d,  $J = 8.0$  Hz, 2H), 7.59-7.52 (m, 3H), 7.40-7.34 (m, 4H), 5.06 (s, 1H), 3.55 (d,  $J = 9.2$  Hz, 1H), 3.50 (d,  $J = 9.7$  Hz, 1H), 3.22 (d,  $J = 9.7$  Hz, 1H), 2.77 (dd,  $J = 9.2, 4.0$  Hz, 1H), 2.49 (s, 3H), 1.30 (td,  $J = 6.3, 4.0$  Hz, 1H), 1.22 (d,  $J = 6.3$  Hz, 3H), 0.98 (dd,  $J = 4.0, 4.0$  Hz, 1H).  $^{13}\text{C}$ -NMR (125 MHz,  $\text{CDCl}_3$ )  $\delta$  ppm; 192.9, 143.5, 135.3, 133.6, 133.0, 129.6, 128.7, 128.3, 127.6, 58.9, 50.9, 50.2, 33.4, 31.9, 21.6, 20.3, 12.0. HRMS (ESI,  $m/z$ ): calcd. for  $\text{C}_{21}\text{H}_{23}\text{ClNO}_3\text{S}^+$  [ $M + \text{H}$ ] $^+$ , 404.1082; found, 404.1079.

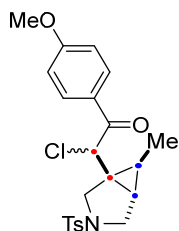

**2-Chloro-1-(4-methoxyphenyl)-2-[(1S\*,5S\*,6S\*)-6-methyl-3-tosyl-3-azabicyclo[3.1.0]hexan-1-yl]ethan-1-one (2b):** (a) 143.3 mg (83%, 64:36), (b) 122.4 mg (71%, 58:42), (c)  $^1\text{H}$  NMR analysis (15%, 57:43). [major]  $R_f = 0.32$  (hexane:AcOEt = 2:1). White solid. Mp 170-171 °C. IR (KBr)  $\nu$   $\text{cm}^{-1}$ ; 1673, 1600, 1341, 1271, 1198, 1162, 665, 611, 549.  $^1\text{H}$  NMR (500 MHz,  $\text{CDCl}_3$ )  $\delta$  ppm; 7.90 (d,  $J = 8.6$  Hz, 2H), 7.70 (d,  $J = 8.6$  Hz, 2H), 7.30 (d,  $J = 8.6$  Hz, 2H), 6.93 (d,  $J = 8.6$  Hz, 2H), 5.05 (s, 1H), 3.89 (d,  $J = 9.5$  Hz, 1H), 3.86 (s, 3H), 3.55 (d,  $J = 10.3$  Hz, 1H), 3.53 (d,  $J = 10.3$  Hz, 1H), 3.41 (dd,  $J = 9.5, 4.0$  Hz, 1H), 2.40 (s, 3H), 1.32 (dd,  $J = 4.0, 4.0$  Hz, 1H), 1.25 (qd,  $J = 6.9, 4.0$  Hz, 1H), 1.00 (d,  $J = 6.9$  Hz, 3H).  $^{13}\text{C}$ -NMR (125 MHz,  $\text{CDCl}_3$ )  $\delta$  ppm; 190.9, 164.2, 143.3, 133.7, 131.3, 129.6, 127.4, 126.5, 114.1, 58.2, 55.5, 50.3, 49.2, 33.6, 30.7, 23.1, 21.5, 12.4. HRMS (FAB,  $m/z$ ): calcd. for  $\text{C}_{22}\text{H}_{25}\text{ClNO}_4\text{S}$  [ $M + \text{H}$ ], 434.1193; found, 434.1182. [minor]  $R_f = 0.29$  (hexane:AcOEt = 2:1). White solid. Mp 139-141 °C. IR (KBr)  $\nu$   $\text{cm}^{-1}$ ; 1681, 1600, 1341, 1265, 1182, 1166, 665, 605, 549.  $^1\text{H}$  NMR (500 MHz,  $\text{CDCl}_3$ )  $\delta$  ppm; 7.64 (d,  $J = 8.6$  Hz, 4H), 7.34 (d,  $J = 8.6$  Hz, 2H), 6.85 (d,  $J = 8.6$  Hz, 2H), 5.03 (s, 1H), 3.85 (s, 3H), 3.54 (d,  $J = 6.3$  Hz, 1H), 3.52 (d,  $J = 6.3$  Hz, 1H), 3.30 (d,  $J = 9.5$  Hz, 1H), 2.89 (dd,  $J = 9.5, 4.0$  Hz, 1H), 2.47 (s, 3H), 1.25 (qd,  $J = 5.7, 4.0$  Hz, 1H), 1.21 (d,  $J = 5.7$  Hz, 3H), 1.03 (dd,  $J = 4.0, 4.0$  Hz, 1H).  $^{13}\text{C}$ -NMR (125 MHz,  $\text{CDCl}_3$ )  $\delta$  ppm; 190.9, 163.9, 143.3, 133.3, 130.9, 129.6, 127.6, 127.5, 113.9, 57.9, 55.5, 51.0, 50.2, 33.5, 31.6, 21.5, 20.3, 11.9. HRMS (FAB,  $m/z$ ): calcd. for  $\text{C}_{22}\text{H}_{25}\text{ClNO}_4\text{S}$  [ $M + \text{H}$ ], 434.1193; found, 434.1189.

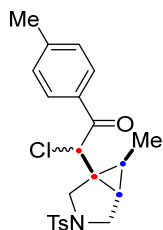

**2-Chloro-2-[(1S\*,5S\*,6S\*)-6-methyl-3-tosyl-3-azabicyclo[3.1.0]hexan-1-yl]-1-(p-tolyl)ethan-1-one (2c):** (a) 160.7 mg (96%, 54:46), (b) 131.2 mg (78%, 31:69), (c) 131.0 mg (78%, 57:43).  $R_f = 0.46$  (hexane:AcOEt = 2:1). White solid. Mp 180-181 °C. IR (KBr)  $\nu$   $\text{cm}^{-1}$ ; 1683, 1604, 1342, 1163, 666, 609, 549.  $^1\text{H}$  NMR (500 MHz,  $\text{CDCl}_3$ , 69:31 mixture of epimers)  $\delta$  ppm;  $^1\text{H}$  NMR (500 MHz,  $\text{CDCl}_3$ )  $\delta$  ppm; 7.81 (d,  $J = 8.0$  Hz, 0.6H), 7.69 (d,  $J = 8.0$  Hz, 0.6H), 7.62 (d,  $J = 8.0$  Hz, 1.4H), 7.47 (d,  $J = 8.0$  Hz, 1.4H), 7.34 (d,  $J = 8.0$  Hz, 1.4H), 7.30 (d,  $J = 8.0$  Hz, 0.6H), 7.26 (d,  $J = 8.0$  Hz, 0.6H), 7.15 (d,  $J = 8.0$  Hz, 1.4H), 5.07 (s, 0.3H), 5.06 (s, 0.7H), 3.88 (d,  $J = 9.7$  Hz, 0.3H), 3.54 (d,  $J = 9.7$  Hz, 0.3H), 3.52 (d,  $J = 9.7$  Hz, 1H), 3.48 (d,  $J = 9.2$  Hz, 0.7H), 3.24 (d,  $J = 9.2$  Hz, 0.7H), 3.14 (dd,  $J = 9.7, 4.0$  Hz, 0.3H), 2.78 (dd,  $J = 9.2, 4.0$  Hz, 0.7H), 2.47 (s, 2.1H), 2.401 (s, 0.9H), 2.396 (s, 0.9H), 2.37 (s, 2.1H), 1.32 (dd,  $J = 4.0, 4.0$  Hz, 0.3H), 1.27-1.22 (m, 1H), 1.20 (d,  $J = 5.7$  Hz, 2.1H), 1.01 (dd,  $J = 4.0, 4.0$  Hz, 0.7H), 0.99 (d,  $J = 6.3$  Hz, 0.9H).  $^{13}\text{C}$ -NMR (125 MHz,  $\text{CDCl}_3$ , 69:31 mixture of epimers)  $\delta$  ppm; 192.3 (major), 192.0 (minor), 145.1 (minor), 144.6 (major), 143.4 (major), 143.3 (minor), 133.6 (minor), 133.0 (major), 132.5 (major), 131.1 (minor), 129.53 (minor), 129.50 (major + minor), 129.3 (major), 128.9 (minor), 128.5 (major), 127.5 (major), 127.4 (minor), 58.7 (major), 58.3 (minor), 50.8 (major), 50.2 (minor), 50.1 (major), 49.2 (minor), 33.5 (minor), 33.4 (major), 31.8 (major), 30.6 (minor), 23.1 (minor), 21.64 (minor), 21.60 (major), 21.5 (major), 21.4 (minor), 20.3 (major), 12.3 (minor), 11.8 (major). HRMS (FAB,  $m/z$ ): calcd. for  $\text{C}_{22}\text{H}_{25}\text{ClNO}_3\text{S}$  [ $M + \text{H}$ ], 420.1214; found, 420.1204.

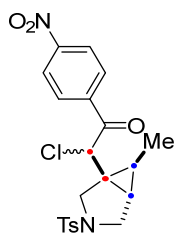

**2-Chloro-2-[(1S\*,5S\*,6S\*)-6-methyl-3-tosyl-3-azabicyclo[3.1.0]hexan-1-yl]-1-(4-nitrophenyl)ethan-1-one (2d):** (a) 92.9 mg (52%, 65:35), (b) 127.7 mg (71%, 71:29), (c) 102.5 mg (57%, 53:47).  $R_f = 0.35$  (hexane:AcOEt = 2:1). Yellow solid. Mp 179-181 °C. IR (KBr)  $\nu$   $\text{cm}^{-1}$ ; 1697, 1600, 1525, 1343, 1163, 665, 600, 549.  $^1\text{H NMR}$  (500 MHz,  $\text{CDCl}_3$ , 71:29 mixture of epimers)  $\delta$  ppm;  $^1\text{H NMR}$  (500 MHz,  $\text{CDCl}_3$ )  $\delta$  ppm; 8.31 (d,  $J = 8.6$  Hz, 0.6H), 7.21 (d,  $J = 8.6$  Hz, 1.4H), 8.09 (d,  $J = 8.6$  Hz, 0.6H), 7.83 (d,  $J = 8.6$  Hz, 1.4H), 7.69 (d,  $J = 8.6$  Hz, 0.6H), 7.66 (d,  $J = 8.6$  Hz, 1.4H), 7.37 (d,  $J = 8.6$  Hz, 1.4H), 7.32 (d,  $J = 8.6$  Hz, 0.6H), 5.03 (s, 0.3H), 4.98 (s, 0.7H), 3.91 (d,  $J = 10.0$  Hz, 0.3H), 3.57 (d,  $J = 9.2$  Hz, 0.7H), 3.55 (d,  $J = 9.2$  Hz, 0.3H), 3.54 (d,  $J = 9.7$  Hz, 0.7H), 3.47 (d,  $J = 10.0$  Hz, 0.3H), 3.25 (d,  $J = 9.7$  Hz, 0.7H), 3.14 (dd,  $J = 9.2, 4.0$  Hz, 0.3H), 2.96 (dd,  $J = 9.2, 4.0$  Hz, 0.7H), 2.50 (s, 2.1H), 2.42 (s, 0.9H), 1.37 (dd,  $J = 4.0, 4.0$  Hz, 0.3H), 1.31-1.24 (m, 1H), 1.22 (d,  $J = 6.3$  Hz, 2.1H), 1.06 (dd,  $J = 4.0, 4.0$  Hz, 0.7H), 1.02 (d,  $J = 6.3$  Hz, 0.9H).  $^{13}\text{C-NMR}$  (125 MHz,  $\text{CDCl}_3$ , 71:29 mixture of epimers)  $\delta$  ppm; 191.3 (major), 190.9 (minor), 150.6 (minor), 150.3 (major), 143.6 (major), 143.5 (minor), 139.7 (major), 138.4 (minor), 133.6 (minor), 133.2 (major), 130.6 (minor), 130.0 (major), 129.6 (major + minor), 127.5 (major), 127.4 (minor), 124.0 (minor), 123.7 (major), 58.8 (minor), 58.3 (major), 51.1 (major), 50.2 (major), 49.9 (minor), 49.1 (minor), 33.1 (minor), 32.9 (major), 31.7 (major), 30.7 (minor), 23.1 (minor), 21.6 (major), 21.5 (minor), 20.2 (major), 12.4 (minor), 11.9 (major). HRMS (FAB,  $m/z$ ): calcd. for  $\text{C}_{21}\text{H}_{22}\text{ClN}_2\text{O}_5\text{S}$  [ $M + H$ ], 449.0938; found, 449.0916.

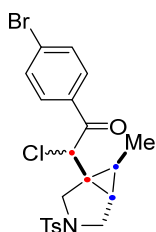

**1-(4-Bromophenyl)-2-chloro-2-[(1S\*,5S\*,6S\*)-6-methyl-3-tosyl-3-azabicyclo[3.1.0]hexan-1-yl]ethan-1-one (2e):** (a) 193.1 mg (quant., 51:49), (b) 175.6 mg (91%, 53:47), (c) 157.1 mg (81%, 41:59). [major]  $R_f = 0.51$  (hexane:AcOEt = 2:1). White solid. Mp 143-144 °C. IR (KBr)  $\nu$   $\text{cm}^{-1}$ ; 1702, 1581, 1351, 1163, 1104, 670, 599, 549.  $^1\text{H NMR}$  (500 MHz,  $\text{CDCl}_3$ )  $\delta$  ppm; 7.64 (d,  $J = 8.6$  Hz, 2H), 7.53-7.48 (m, 4H), 7.35 (d,  $J = 8.6$  Hz, 2H), 4.96 (s, 1H), 3.54 (d,  $J = 4.8$  Hz, 1H), 3.52 (d,  $J = 4.8$  Hz, 1H), 3.24 (d,  $J = 9.2$  Hz, 1H), 2.89 (dd,  $J = 9.2, 4.0$  Hz, 1H), 2.48 (s, 3H), 1.26 (qd,  $J = 6.3, 4.0$  Hz, 1H), 1.20 (d,  $J = 6.3$  Hz, 3H), 1.02 (dd,  $J = 4.0, 4.0$  Hz, 1H).  $^{13}\text{C-NMR}$  (125 MHz,  $\text{CDCl}_3$ )  $\delta$  ppm; 191.7, 143.5, 133.7, 133.1, 131.9, 130.0, 129.6, 128.8, 127.5, 58.2, 51.0, 50.2, 33.2, 31.7, 21.6, 20.3, 11.9. HRMS (FAB,  $m/z$ ): calcd. for  $\text{C}_{21}\text{H}_{22}\text{BrClNO}_3\text{S}$  [ $M + H$ ], 482.0192; found, 482.0174. [minor]  $R_f = 0.47$  (hexane:AcOEt = 2:1). White solid. Mp 177-178 °C. IR (KBr)  $\nu$   $\text{cm}^{-1}$ ; 1685, 1584, 1341, 1163, 1100, 665, 601, 549.  $^1\text{H NMR}$  (500 MHz,  $\text{CDCl}_3$ )  $\delta$  ppm; 7.79 (d,  $J = 8.6$  Hz, 2H), 7.70 (d,  $J = 8.6$  Hz, 2H), 7.61 (d,  $J = 8.6$  Hz, 2H), 7.31 (d,  $J = 8.6$  Hz, 2H), 5.00 (s, 1H), 3.90 (d,  $J = 9.5$  Hz, 1H), 3.54 (d,  $J = 9.5$  Hz, 1H), 3.50 (d,  $J = 9.5$  Hz, 1H), 3.14 (dd,  $J = 9.5, 3.4$  Hz, 1H), 2.42 (s, 3H), 1.37-1.24 (m, 2H), 1.00 (d,  $J = 6.3$  Hz, 3H).  $^{13}\text{C-NMR}$  (125 MHz,  $\text{CDCl}_3$ )  $\delta$  ppm; 191.4, 143.4, 133.6, 133.4, 132.2, 130.3, 129.6, 129.4, 127.4, 58.4, 50.1, 49.2, 33.3, 30.7, 23.1, 21.5, 12.4. HRMS (FAB,  $m/z$ ): calcd. for  $\text{C}_{21}\text{H}_{22}\text{BrClNO}_3\text{S}$  [ $M + H$ ], 482.0192; found, 482.0192.

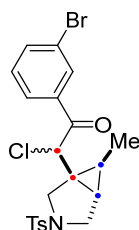

**1-(3-Bromophenyl)-2-chloro-2-[(1S\*,5S\*,6S\*)-6-methyl-3-tosyl-3-azabicyclo[3.1.0]hexan-1-yl]ethan-1-one (2f):** (a) 175.7 mg (91%, 61:39), (b) 166.9 mg (86%, 61:39), (c) 152.2 mg (79%, 66:34).  $R_f = 0.39$  (hexane:AcOEt = 2:1). Pale yellow solid. Mp 137-141 °C. IR (KBr)  $\nu$   $\text{cm}^{-1}$ ; 1696, 1567, 1345, 1165, 1113, 666, 600, 550.  $^1\text{H NMR}$  (500 MHz,  $\text{CDCl}_3$ , 61:39 mixture of epimers)  $\delta$  ppm;  $^1\text{H NMR}$  (500 MHz,  $\text{CDCl}_3$ )  $\delta$  ppm; 8.01 (t,  $J = 1.7$  Hz, 0.6H), 7.81 (d,  $J = 8.0$  Hz, 0.6H), 7.72 (t,  $J = 1.7$  Hz, 0.4H), 7.71-7.60 (m, 3H), 7.54 (d,  $J = 8.0$  Hz, 0.4H), 7.36-7.27 (m, 2.6H), 7.24 (d,  $J = 6.9$  Hz, 0.4H), 4.96 (s, 0.6H), 4.93 (s, 0.4H), 3.85 (d,  $J = 10.0$  Hz, 0.6H), 3.53 (d,  $J = 5.2$  Hz, 0.4H), 3.52 (d,  $J = 9.5$  Hz, 0.6H), 3.51 (d,  $J = 5.2$  Hz, 0.4H), 3.46 (d,  $J = 9.5$  Hz, 0.6H), 3.22 (d,  $J = 9.2$  Hz, 0.4H), 3.11 (dd,  $J = 10.0, 4.0$  Hz, 0.6H), 2.89 (dd,  $J = 9.2, 4.0$  Hz, 0.4H), 2.45 (s, 1.2H), 2.39 (s, 1.8H), 1.31 (dd,  $J = 4.0, 4.0$  Hz, 0.6H), 1.30-1.25 (m, 1H), 1.18 (d,  $J = 6.3$  Hz, 1.2H), 0.99 (d,  $J = 6.3$  Hz, 1.8H), 0.98 (dd,  $J = 4.0, 4.0$  Hz, 0.4H).  $^{13}\text{C-NMR}$  (125 MHz,  $\text{CDCl}_3$ , 61:39 mixture of epimers)  $\delta$  ppm; 191.3 (minor), 191.1 (major), 143.5 (minor), 143.4 (major), 136.82 (major), 136.78 (minor), 136.5 (minor), 135.5 (major), 133.6 (major), 133.1 (minor), 131.8 (major), 131.4 (minor), 130.4 (major), 130.2 (minor), 129.64 (minor), 129.60 (major), 127.5 (minor), 127.4 (major), 127.3 (major), 127.0 (minor), 123.1 (major), 123.0 (minor), 58.5 (major), 58.1 (minor), 51.0 (major), 50.2 (minor), 50.1 (major), 49.2 (minor), 33.3 (major), 33.1 (minor), 31.6 (minor), 30.7 (major), 23.1 (major), 21.6 (minor), 21.5 (major), 20.3 (minor), 12.4 (major), 11.9 (minor). HRMS (FAB,  $m/z$ ): calcd. for  $\text{C}_{21}\text{H}_{22}\text{BrClNO}_3\text{S}$  [ $M + H$ ], 482.0192; found, 482.0192.

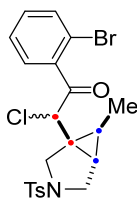

**1-(2-Bromophenyl)-2-chloro-2-[(1S\*,5S\*,6S\*)-6-methyl-3-tosyl-3-azabicyclo[3.1.0]hexan-1-yl]ethan-1-one (2g):** (a) 156.0 mg (81%, 55:45), (b) 115.6 mg (60%, 58:42), (c) 132.8 mg (69%, 60:40). [major]  $R_f = 0.41$  (hexane:AcOEt = 2:1). White solid. Mp 169-170 °C. IR (KBr)  $\nu$   $\text{cm}^{-1}$ ; 1707, 1582, 1339, 1161, 1098, 670, 601, 549.  $^1\text{H}$  NMR (500 MHz,  $\text{CDCl}_3$ )  $\delta$  ppm; 7.69 (d,  $J = 8.6$  Hz, 2H), 7.59 (d,  $J = 8.0$  Hz, 1H), 7.41 (dd,  $J = 8.0, 6.9$  Hz, 1H), 7.38-7.31 (m, 4H), 5.15 (s, 1H), 3.55 (d,  $J = 9.7$  Hz, 1H), 3.53 (d,  $J = 9.2$  Hz, 1H), 3.40 (d,  $J = 9.7$  Hz, 1H), 2.89 (dd,  $J = 9.2, 4.0$  Hz, 1H), 2.43 (s, 3H), 1.26 (qd,  $J = 6.3, 4.0$  Hz, 1H), 1.26 (dd,  $J = 4.0, 4.0$  Hz, 1H), 0.80 (d,  $J = 6.3$  Hz, 3H).  $^{13}\text{C}$ -NMR (125 MHz,  $\text{CDCl}_3$ )  $\delta$  ppm; 196.2, 143.6, 138.9, 133.4, 133.2, 132.4, 129.7, 129.2, 127.7, 127.5, 118.7, 63.6, 49.5, 49.3, 34.0, 30.5, 23.7, 21.5, 12.5. HRMS (FAB,  $m/z$ ): calcd. for  $\text{C}_{21}\text{H}_{22}\text{BrClNO}_3\text{S}$  [ $\text{M} + \text{H}$ ], 482.0192; found, 482.0192. [minor]  $R_f = 0.38$  (hexane:AcOEt = 2:1). Pale yellow oil. IR (neat)  $\nu$   $\text{cm}^{-1}$ ; 1716, 1586, 1348, 1167, 1108, 665, 598, 550.  $^1\text{H}$  NMR (500 MHz,  $\text{CDCl}_3$ )  $\delta$  ppm; 7.67 (d,  $J = 8.0$  Hz, 2H), 7.52 (d,  $J = 8.0$  Hz, 1H), 7.39 (d,  $J = 8.0$  Hz, 2H), 7.27 (ddd,  $J = 8.0, 7.5, 1.7$  Hz, 1H), 7.09 (dd,  $J = 7.5, 7.5$  Hz, 1H), 6.63 (dd,  $J = 7.5, 1.7$  Hz, 1H), 5.27 (s, 1H), 3.57 (d,  $J = 9.7$  Hz, 1H), 3.42 (d,  $J = 9.2$  Hz, 1H), 3.00 (d,  $J = 9.7$  Hz, 1H), 2.63 (dd,  $J = 9.2, 4.0$  Hz, 1H), 2.47 (s, 3H), 1.29 (qd,  $J = 6.3, 4.0$  Hz, 1H), 1.16 (d,  $J = 6.3$  Hz, 3H), 0.80 (dd,  $J = 4.0, 4.0$  Hz, 1H).  $^{13}\text{C}$ -NMR (125 MHz,  $\text{CDCl}_3$ )  $\delta$  ppm; 195.7, 143.8, 139.7, 133.6, 132.7, 132.4, 129.7, 128.8, 127.8, 127.4, 118.4, 63.2, 50.4, 50.1, 33.6, 31.5, 21.6, 20.0, 11.6. HRMS (FAB,  $m/z$ ): calcd. for  $\text{C}_{21}\text{H}_{22}\text{BrClNO}_3\text{S}$  [ $\text{M} + \text{H}$ ], 482.0192; found, 482.0174.

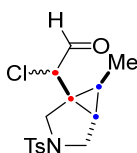

**2-Chloro-2-[(1S\*,5S\*,6S\*)-6-methyl-3-tosyl-3-azabicyclo[3.1.0]hexan-1-yl]acetaldehyde (2h):** (a) 33.2 mg (25%, 43:57), (b) 67.4 mg (51%, 60:40), (c) 34.7 mg (26%, 55:45).  $R_f = 0.30$  (hexane:AcOEt = 2:1). Colorless oil. IR (neat)  $\nu$   $\text{cm}^{-1}$ ; 1732, 1598, 1344, 1164, 666, 605, 549.  $^1\text{H}$  NMR (500 MHz,  $\text{CDCl}_3$ , 60:40 mixture of epimers)  $\delta$  ppm;  $^1\text{H}$  NMR (500 MHz,  $\text{CDCl}_3$ )  $\delta$  ppm; 9.50 (s, 0.4H), 9.46 (s, 0.6H), 7.65 (d,  $J = 8.0$  Hz, 1.2H), 7.63 (d,  $J = 8.0$  Hz, 0.8H), 7.32 (d,  $J = 8.0$  Hz, 1.2H), 7.31 (d,  $J = 8.0$  Hz, 0.8H), 4.24 (s, 0.6H), 4.09 (s, 0.4H), 3.62 (d,  $J = 9.2$  Hz, 0.4H), 3.56 (d,  $J = 9.2$  Hz, 0.4H), 3.53 (d,  $J = 9.7$  Hz, 0.6H), 3.50 (d,  $J = 9.2$  Hz, 0.6H), 3.22 (d,  $J = 9.2$  Hz, 0.6H), 3.19 (dd,  $J = 9.7, 4.0$  Hz, 0.4H), 3.08 (dd,  $J = 9.7, 4.0$  Hz, 0.6H), 2.94 (d,  $J = 9.7$  Hz, 0.4H), 2.42 (s, 3H), 1.37 (dd,  $J = 4.0, 4.0$  Hz, 0.4H), 1.36-1.30 (m, 1H), 1.21-1.15 (m, 0.6H), 1.11 (d,  $J = 6.3$  Hz, 1.2H), 1.10 (d,  $J = 6.3$  Hz, 1.8H).  $^{13}\text{C}$  NMR (125 MHz,  $\text{CDCl}_3$ , 60:40 mixture of epimers)  $\delta$  ppm; 194.4 (minor), 192.7 (major), 143.7 (minor), 143.6 (major), 133.38 (minor), 133.36 (major), 129.7, 127.4 (major), 127.3 (minor), 65.0 (major), 63.5 (minor), 50.7 (major), 50.2 (minor), 49.4 (major), 48.9 (minor), 33.0 (major), 32.9 (minor), 30.4 (minor), 30.1 (major), 22.9 (major), 21.5, 18.7 (minor), 12.6 (major), 11.5 (minor). HRMS (ESI,  $m/z$ ): calcd. for  $\text{C}_{15}\text{H}_{19}\text{ClNO}_3\text{S}^+$  [ $\text{M} + \text{H}$ ] $^+$ , 328.0769; found, 328.0770.

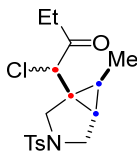

**1-Chloro-1-[(1S\*,5S\*,6S\*)-6-methyl-3-tosyl-3-azabicyclo[3.1.0]hexan-1-yl]butan-2-one (2i):** (a) 121.1 mg (85%, 59:41), (b) 105.2 mg (74%, 60:40), (c) 88.8 mg (62%, 62:38). [major]  $R_f = 0.49$  (hexane:AcOEt = 2:1). White solid. Mp 116-117 °C. IR (KBr)  $\nu$   $\text{cm}^{-1}$ ; 1722, 1598, 1338, 1163, 668, 604, 550.  $^1\text{H}$  NMR (500 MHz,  $\text{CDCl}_3$ )  $\delta$  ppm; 7.66 (d,  $J = 8.0$  Hz, 2H), 7.31 (d,  $J = 8.0$  Hz, 2H), 4.28 (s, 1H), 3.52 (d,  $J = 9.2$  Hz, 1H), 3.50 (d,  $J = 9.2$  Hz, 1H), 3.27 (d,  $J = 9.2$  Hz, 1H), 3.07 (dd,  $J = 9.2, 4.0$  Hz, 1H), 2.66 (dq,  $J = 18.3, 7.2$  Hz, 1H), 2.57 (dq,  $J = 18.3, 7.2$  Hz, 1H), 2.42 (s, 3H), 1.33 (qd,  $J = 6.9, 4.0$  Hz, 1H), 1.24 (dd,  $J = 4.0, 4.0$  Hz, 1H), 1.13 (d,  $J = 6.9$  Hz, 3H), 1.08 (t,  $J = 7.2$  Hz, 3H).  $^{13}\text{C}$ -NMR (125 MHz,  $\text{CDCl}_3$ )  $\delta$  ppm; 203.4, 143.5, 133.5, 129.6, 127.4, 64.4, 49.5, 49.2, 34.3, 33.0, 30.5, 23.4, 21.5, 12.7, 7.7. HRMS (FAB,  $m/z$ ): calcd. for  $\text{C}_{17}\text{H}_{23}\text{ClNO}_3\text{S}$  [ $\text{M} + \text{H}$ ], 356.1087; found, 356.1103. [minor]  $R_f = 0.41$  (hexane:AcOEt = 2:1). White solid. Mp 146-148 °C. IR (KBr)  $\nu$   $\text{cm}^{-1}$ ; 1734, 1598, 1344, 1168, 666, 606, 549.  $^1\text{H}$  NMR (500 MHz,  $\text{CDCl}_3$ )  $\delta$  ppm; 7.62 (d,  $J = 8.0$  Hz, 2H), 7.30 (d,  $J = 8.0$  Hz, 2H), 4.16 (s, 1H), 3.59 (d,  $J = 9.2$  Hz, 1H), 3.50 (d,  $J = 9.2$  Hz, 1H), 3.17 (dd,  $J = 9.2, 4.0$  Hz, 1H), 2.93 (d,  $J = 9.2$  Hz, 1H), 2.60 (dq,  $J = 18.3, 7.2$  Hz, 1H), 2.41 (s, 3H), 2.39 (dq,  $J = 18.3, 7.2$  Hz, 1H), 1.34-1.30 (m, 1H), 1.14-1.08 (m, 4H), 0.89 (t,  $J = 7.2$  Hz, 3H).  $^{13}\text{C}$ -NMR (125 MHz,  $\text{CDCl}_3$ )  $\delta$  ppm; 204.3, 143.6, 133.2, 129.6, 127.3, 63.9, 50.9, 50.3, 34.1, 33.5, 31.6, 21.4, 19.5, 11.6, 7.5. HRMS (FAB,  $m/z$ ): calcd. for  $\text{C}_{17}\text{H}_{23}\text{ClNO}_3\text{S}$  [ $\text{M} + \text{H}$ ], 356.1087; found, 356.1103.

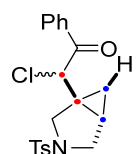

**2-Chloro-1-phenyl-2-[(1S\*,5S\*)-3-tosyl-3-azabicyclo[3.1.0]hexan-1-yl]ethan-1-one (2j):** (a) 113.1 mg (73%, 60:40), (b) 116.5 mg (75%, 53:47), (c) 115.4 mg (74%, 44:56). [major]  $R_f = 0.49$  (hexane:AcOEt = 2:1). Pale yellow solid. Mp 162-163 °C. IR (KBr)  $\nu$   $\text{cm}^{-1}$ ; 1691, 1597, 1342, 1164, 664, 593, 550.  $^1\text{H}$  NMR (500 MHz,  $\text{CDCl}_3$ )  $\delta$  ppm; 7.89 (d,  $J = 7.5$  Hz, 2H), 7.69 (d,  $J = 8.0$  Hz, 2H), 7.60 (t,  $J = 7.5$  Hz, 1H), 7.47 (dd,  $J = 7.5, 7.5$  Hz, 2H), 7.32 (d,  $J = 8.0$  Hz, 2H), 4.89 (s, 1H), 3.84 (d,  $J = 9.7$  Hz, 1H), 3.52 (d,  $J = 9.7$  Hz, 1H), 3.43 (d,  $J = 9.7$  Hz, 1H), 3.17 (dd,  $J = 9.7, 4.0$  Hz, 1H), 2.42 (s, 3H), 1.62-1.57 (m, 1H), 0.91 (s, 1H), 0.89 (d,  $J = 2.3$  Hz, 1H).  $^{13}\text{C}$ -NMR (125 MHz,  $\text{CDCl}_3$ )  $\delta$  ppm; 191.9, 143.5, 134.1, 133.5, 129.6, 128.84, 128.82, 127.4, 61.4, 49.4, 49.1, 29.8, 23.3, 21.5, 16.3 (note that two carbon peaks overlap with each other). HRMS (FAB,  $m/z$ ): calcd. for  $\text{C}_{20}\text{H}_{21}\text{ClNO}_3\text{S}$  [ $\text{M} +$

H], 390.0931; found, 390.0918. [**minor**]  $R_f = 0.43$  (hexane:AcOEt = 2:1). White solid. Mp 107-108 °C. IR (KBr)  $\nu$   $\text{cm}^{-1}$ : 1697, 1596, 1338, 1161, 670, 597, 549.  $^1\text{H}$  NMR (500 MHz,  $\text{CDCl}_3$ )  $\delta$  ppm; 7.76 (d,  $J = 7.5$  Hz, 2H), 7.65 (d,  $J = 8.0$  Hz, 2H), 7.57 (t,  $J = 7.5$  Hz, 1H), 7.42 (dd,  $J = 7.5, 7.5$  Hz, 2H), 7.34 (d,  $J = 8.0$  Hz, 2H), 5.11 (s, 1H), 3.60 (d,  $J = 9.7$  Hz, 1H), 3.51 (d,  $J = 9.7$  Hz, 1H), 3.25 (d,  $J = 9.2$  Hz, 1H), 3.04 (dd,  $J = 9.2, 4.0$  Hz, 1H), 2.45 (s, 3H), 1.56 (td,  $J = 5.7, 4.0$  Hz, 1H), 0.91 (d,  $J = 5.7$  Hz, 2H).  $^{13}\text{C}$ -NMR (125 MHz,  $\text{CDCl}_3$ )  $\delta$  ppm; 192.1, 143.6, 134.6, 133.9, 133.2, 129.6, 128.8, 128.6, 127.4, 60.2, 50.8, 49.8, 29.7, 22.4, 21.5, 14.7. HRMS (FAB,  $m/z$ ): calcd. for  $\text{C}_{20}\text{H}_{21}\text{ClNO}_3\text{S}$  [ $\text{M} + \text{H}$ ], 390.0931; found, 390.0921.

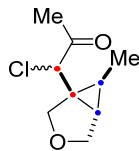

**1-Chloro-1-[(1S\*,5S\*,6S\*)-6-methyl-3-oxabicyclo[3.1.0]hexan-1-yl]propan-2-one (2k):** (a) 51.3 mg (68%, 51:49), (b) 50.4 mg (67%, 61:39), (c) 64.5 mg (85%, 51:49). [**major**]  $R_f = 0.56$  (hexane:AcOEt = 2:1). Colorless oil. IR (neat)  $\nu$   $\text{cm}^{-1}$ : 1726, 1358, 1061, 645, 588.  $^1\text{H}$  NMR (500 MHz,  $\text{CDCl}_3$ )  $\delta$  ppm; 4.48 (s, 1H), 3.90 (d,  $J = 8.0$  Hz, 1H), 3.80 (d,  $J = 8.6$  Hz, 1H), 3.77 (d,  $J = 8.0$  Hz, 1H), 3.72 (dd,  $J = 8.6, 2.9$  Hz, 1H), 2.33 (s, 3H), 1.40 (dd,  $J = 5.2, 2.9$  Hz, 1H), 1.30 (qd,  $J = 6.3, 5.2$  Hz, 1H), 1.19 (d,  $J = 6.3$  Hz, 3H).  $^{13}\text{C}$ -NMR (125 MHz,  $\text{CDCl}_3$ )  $\delta$  ppm; 201.1, 69.3, 68.6, 64.9, 35.0, 32.2, 27.1, 22.6, 12.7. HRMS (ESI,  $m/z$ ): calcd. for  $\text{C}_9\text{H}_{13}\text{O}_2^+$  [ $\text{M} - \text{Cl}$ ] $^+$ , 153.0910; found, 153.0914. [**minor**]  $R_f = 0.48$  (hexane:AcOEt = 2:1). Colorless oil. IR (neat)  $\nu$   $\text{cm}^{-1}$ : 1731, 1359, 1059, 654, 560.  $^1\text{H}$  NMR (500 MHz,  $\text{CDCl}_3$ )  $\delta$  ppm; 4.41 (s, 1H), 3.88 (d,  $J = 8.6$  Hz, 1H), 3.82 (d,  $J = 8.0$  Hz, 1H), 3.79 (dd,  $J = 8.0, 2.9$  Hz, 1H), 3.62 (d,  $J = 8.6$  Hz, 1H), 2.38 (s, 3H), 1.50 (dd,  $J = 4.0, 2.9$  Hz, 1H), 1.19 (d,  $J = 5.7$  Hz, 3H), 1.14 (qd,  $J = 5.7, 4.0$  Hz, 1H).  $^{13}\text{C}$ -NMR (125 MHz,  $\text{CDCl}_3$ )  $\delta$  ppm; 201.8, 70.3, 70.0, 64.7, 35.2, 33.4, 28.2, 18.6, 11.6. HRMS (ESI,  $m/z$ ): calcd. for  $\text{C}_9\text{H}_{13}\text{O}_2^+$  [ $\text{M} - \text{Cl}$ ] $^+$ , 153.0910; found, 153.0909.

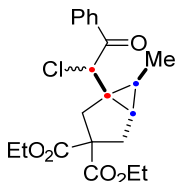

**Diethyl (1S\*,5S\*,6S\*)-1-(1-chloro-2-oxo-2-phenylethyl)-6-methylbicyclo[3.1.0]hexane-3,3-dicarboxylate (2l):** (a) 71.4 mg (45%, 64:36). (b) 42.1 mg (27%, 60:40). (c)  $^1\text{H}$  NMR analysis (20%, 63:37). [**major**]  $R_f = 0.59$  (hexane:AcOEt = 2:1). Colorless oil. IR (neat)  $\nu$   $\text{cm}^{-1}$ : 1729, 1694, 1597, 1251, 1181, 738, 689.  $^1\text{H}$  NMR (500 MHz,  $\text{CDCl}_3$ )  $\delta$  ppm; 7.93 (d,  $J = 7.5$  Hz, 2H), 7.57 (t,  $J = 7.5$  Hz, 1H), 7.46 (dd,  $J = 7.5, 7.5$  Hz, 2H), 5.11 (s, 1H), 4.16 (q,  $J = 7.0$  Hz, 2H), 4.14 (q,  $J = 7.0$  Hz, 2H), 2.96 (d,  $J = 14.3$  Hz, 1H), 2.84 (d,  $J = 14.3$  Hz, 1H), 2.59 (dd,  $J = 13.8, 5.2$  Hz, 1H), 2.44 (d,  $J = 13.8$  Hz, 1H), 1.26 (dd,  $J = 5.2, 4.6$  Hz, 1H), 1.22 (t,  $J = 7.0$  Hz, 3H), 1.20 (t,  $J = 7.0$  Hz, 3H), 1.01-0.94 (m, 1H), 0.97 (d,  $J = 4.6$  Hz, 3H).  $^{13}\text{C}$ -NMR (125 MHz,  $\text{CDCl}_3$ )  $\delta$  ppm; 193.2, 172.7, 171.5, 134.5, 133.6, 128.70, 128.67, 61.6, 61.5, 61.1, 60.8, 37.3, 35.8, 35.5, 33.7, 25.5, 13.92, 13.89, 13.5. HRMS (ESI,  $m/z$ ): calcd. for  $\text{C}_{21}\text{H}_{26}\text{ClO}_5^+$  [ $\text{M} + \text{H}$ ] $^+$ , 393.1463; found, 393.1474. [**minor**]  $R_f = 0.56$  (hexane:AcOEt = 2:1). Colorless oil. IR (neat)  $\nu$   $\text{cm}^{-1}$ : 2980, 2936, 1731, 1697, 1250, 1181.  $^1\text{H}$  NMR (500 MHz,  $\text{CDCl}_3$ )  $\delta$  ppm; 7.83 (d,  $J = 7.5$  Hz, 2H), 7.58 (t,  $J = 7.5$  Hz, 1H), 7.47 (dd,  $J = 7.5, 7.5$  Hz, 2H), 5.18 (s, 1H), 4.16 (q,  $J = 7.1$  Hz, 2H), 4.12 (q,  $J = 7.1$  Hz, 2H), 2.67 (d,  $J = 14.3$  Hz, 1H), 2.64 (d,  $J = 14.3$  Hz, 1H), 2.43 (d,  $J = 14.3$  Hz, 1H), 2.18 (dd,  $J = 14.3, 4.6$  Hz, 1H), 1.22 (t,  $J = 7.1$  Hz, 3H), 1.20 (t,  $J = 7.1$  Hz, 3H), 1.20 (d,  $J = 6.3$  Hz, 3H), 0.97 (dd,  $J = 4.6, 4.6$  Hz, 1H), 0.86 (qd,  $J = 6.3, 4.6$  Hz, 1H).  $^{13}\text{C}$ -NMR (125 MHz,  $\text{CDCl}_3$ )  $\delta$  ppm; 193.6, 172.6, 171.2, 136.1, 133.3, 128.64, 128.56, 61.7, 61.6, 61.5, 59.6, 37.2, 36.3, 35.4, 34.8, 22.5, 14.0, 13.9, 13.0. HRMS (ESI,  $m/z$ ): calcd. for  $\text{C}_{21}\text{H}_{26}\text{ClO}_5^+$  [ $\text{M} + \text{H}$ ] $^+$ , 393.1463; found, 393.1475.

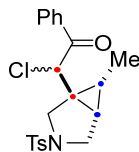

**2-Chloro-2-[(1S\*,5S\*,6R\*)-6-methyl-3-tosyl-3-azabicyclo[3.1.0]hexan-1-yl]-1-phenylethanol (cis-2a):** (a) 98.2 mg (61%, 65:35). [**major**]  $R_f = 0.39$  (hexane:AcOEt = 2:1). White solid. Mp 139-141 °C. IR (KBr)  $\nu$   $\text{cm}^{-1}$ : 1690, 1339, 1164, 667.  $^1\text{H}$  NMR (500 MHz,  $\text{CDCl}_3$ )  $\delta$  ppm; 7.87 (d,  $J = 7.4$  Hz, 2H), 7.73 (d,  $J = 8.0$  Hz, 2H), 7.59 (t,  $J = 7.4$  Hz, 1H), 7.46 (dd,  $J = 7.4, 7.4$  Hz, 2H), 7.31 (d,  $J = 8.0$  Hz, 2H), 4.75 (s, 1H), 3.71 (d,  $J = 10.3$  Hz, 1H), 3.65 (d,  $J = 10.3$  Hz, 1H), 3.44 (dd,  $J = 9.7, 5.2$  Hz, 1H), 3.37 (d,  $J = 9.7$  Hz, 1H), 2.41 (s, 3H), 1.62 (dd,  $J = 8.6, 5.2$  Hz, 1H), 1.22-1.16 (m, 1H), 0.94 (d,  $J = 6.4$  Hz, 3H).  $^{13}\text{C}$ -NMR (125 MHz,  $\text{CDCl}_3$ )  $\delta$  ppm; 192.1, 143.4, 134.01, 133.96, 133.7, 129.6, 128.82, 128.78, 127.4, 63.8, 47.0, 46.6, 34.0, 27.1, 24.5, 21.5, 6.1. HRMS (ESI,  $m/z$ ): calcd. for  $\text{C}_{21}\text{H}_{23}\text{ClNO}_3\text{S}^+$  [ $\text{M} + \text{H}$ ] $^+$ , 404.1082; found, 404.1081. [**minor**]  $R_f = 0.37$  (hexane:AcOEt = 2:1). White solid. Mp 149-151 °C. IR (KBr)  $\nu$   $\text{cm}^{-1}$ : 1693, 1339, 1164, 668.  $^1\text{H}$  NMR (500 MHz,  $\text{CDCl}_3$ )  $\delta$  ppm; 7.70 (d,  $J = 7.4$  Hz, 2H), 7.69 (d,  $J = 8.0$  Hz, 2H), 7.57 (t,  $J = 7.4$  Hz, 1H), 7.42 (dd,  $J = 7.4, 7.4$  Hz, 2H), 7.35 (d,  $J = 8.0$  Hz, 2H), 5.05 (s, 1H), 3.48 (d,  $J = 9.7$  Hz, 1H), 3.44 (d,  $J = 9.7$  Hz, 1H), 3.39 (d,  $J = 9.7$  Hz, 1H), 3.27 (dd,  $J = 9.7, 5.2$  Hz, 1H), 2.47 (s, 3H), 1.54 (dd,  $J = 8.6, 5.2$  Hz, 1H), 1.29-1.23 (m, 1H), 1.08 (d,  $J = 6.3$  Hz, 3H).  $^{13}\text{C}$ -NMR (125 MHz,  $\text{CDCl}_3$ )  $\delta$  ppm; 192.1, 143.5, 134.9, 133.8, 133.5, 129.6, 128.7, 128.5, 127.5, 62.0, 48.5, 47.2, 33.3, 25.9, 22.0, 21.5, 6.0. HRMS (ESI,  $m/z$ ): calcd. for  $\text{C}_{21}\text{H}_{23}\text{ClNO}_3\text{S}^+$  [ $\text{M} + \text{H}$ ] $^+$ , 404.1082; found, 404.1089.

#### 4. Ene-type Reaction of **1m** and **1n** using $\text{Et}_n\text{AlCl}_{(3-n)}$ and Characterization of **4m** and **4n**

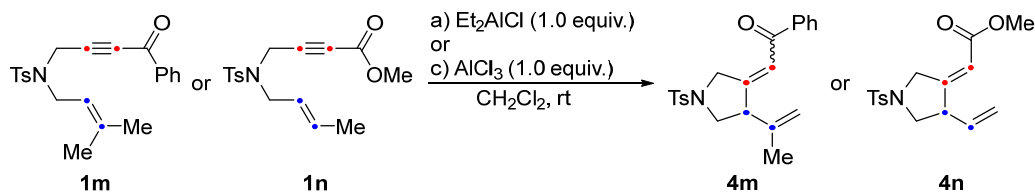

##### Preparation of (Z)- and (E)-1-Phenyl-2-(4-(prop-1-en-2-yl)-1-tosylpyrrolidin-3-ylidene)ethan-1-one (**4m**)

To a solution of enynone **1m** (152.6 mg, 0.4 mmol) in  $\text{CH}_2\text{Cl}_2$  (2 mL) was added  $\text{Et}_2\text{AlCl}$  (1.0 M in hexane solution, 0.4 mL, 0.4 mmol, method **a**) at 0 °C. After being stirred at room temperature for 1 h, the reaction mixture was quenched with sat.  $\text{NaHCO}_3$  and sat. Rochelle salt, and extracted with AcOEt. The organic layer was dried over  $\text{MgSO}_4$  and concentrated in vacuo to dryness. The residue was purified by MPLC (hexane:AcOEt = 85:15) to give **4m** (113.7 mg, 75%) as a mixture of geometric isomers in 90:10 ratio. The major isomer of **4m** was determined to be the Z-isomer by NOESY spectra analysis (See page S11).

**4m**:  $R_f = 0.48$  (hexane:AcOEt = 2:1). Yellow oil.  $^1\text{H}$  NMR (500 MHz,  $\text{CDCl}_3$ , 90:10 mixture of geometric isomers)  $\delta$  ppm: 7.87 (d,  $J = 7.4$  Hz, 2H), 7.76 (d,  $J = 8.0$  Hz, 1.8H), 7.62 (d,  $J = 8.0$  Hz, 0.2H), 7.57 (t,  $J = 7.4$  Hz, 0.1H), 7.54 (t,  $J = 7.4$  Hz, 0.9H), 7.44 (dd,  $J = 7.4, 7.4$  Hz, 2H), 7.33 (d,  $J = 8.0$  Hz, 1.8H), 7.27 (d,  $J = 8.0$  Hz, 0.2H), 6.82 (ddd,  $J = 2.7, 2.7, 1.7$  Hz, 0.9H), 6.41 (ddd,  $J = 1.2, 1.2, 1.2$  Hz, 0.1H), 4.99 (br.s, 0.9H), 4.95 (br.s, 0.9H), 4.71 (br.s, 0.1H), 4.64 (br.s, 0.1H), 4.56 (dd,  $J = 18.9, 2.7$  Hz, 0.9H), 4.29 (ddd,  $J = 18.9, 2.7, 2.7$  Hz, 0.9H), 3.61-3.56 (m, 2.1H), 3.42 (d,  $J = 17.2$  Hz, 0.1H), 3.35 (ddd,  $J = 5.2, 4.6, 4.6$  Hz, 0.1H), 3.13-3.05 (m, 0.9H), 2.41 (s, 3H), 1.62 (s, 2.7H), 1.36 (s, 0.3H).  $^{13}\text{C}$  NMR (125 MHz,  $\text{CDCl}_3$ , 90:10 mixture of geometric isomers)  $\delta$  ppm: 196.4 (minor), 189.5 (major), 160.7, 143.8 (major), 143.0 (minor), 141.7, 138.0 (major), 136.3 (minor), 133.3 (minor), 132.9 (major), 132.4 (minor), 132.2 (major), 129.7 (major), 129.6 (minor), 128.9 (minor), 128.6 (major), 128.2 (minor), 128.1 (major), 127.9 (major), 127.7 (minor), 120.1 (minor), 117.0 (major), 116.2 (major), 114.2 (minor), 53.7 (major), 52.9 (major), 52.6 (minor), 51.5 (minor), 50.3 (major), 35.7 (minor), 21.5, 18.7 (major), 17.7 (minor). The  $^1\text{H}$  and  $^{13}\text{C}$  NMR spectra of **4m** were identical to data reported in the literature.<sup>1</sup>

##### Preparation of (Z)-Methyl 2-(1-tosyl-4-vinylpyrrolidin-3-ylidene)acetate (**4n**)

To a solution of enynone **1n** (128.6 mg, 0.4 mmol) in  $\text{CH}_2\text{Cl}_2$  (2 mL) was added  $\text{AlCl}_3$  (53.3 mg, 0.4 mmol, method **c**) at 0 °C. After being stirred at room temperature for 24 h, the reaction mixture was quenched with sat.  $\text{NaHCO}_3$  and sat. Rochelle salt, and extracted with AcOEt. The organic layer was dried over  $\text{MgSO}_4$  and concentrated in vacuo to dryness. The residue was purified by MPLC (hexane:AcOEt = 85:15) to give **4n** (100.3 mg, 78%). Considering the stereochemistry of major isomer of **4m**, **4n** was determined to be the Z-isomer.

**4n**:  $R_f = 0.47$  (hexane:AcOEt = 2:1). Colorless oil. IR (neat)  $\nu$   $\text{cm}^{-1}$ : 1715, 1351, 1218, 1164.  $^1\text{H}$  NMR (500 MHz,  $\text{CDCl}_3$ )  $\delta$  ppm: 7.73 (d,  $J = 8.3$  Hz, 2H), 7.34 (d,  $J = 8.3$  Hz, 2H), 5.66 (ddd,  $J = 2.9, 2.3, 2.3$  Hz, 1H), 5.48 (ddd,  $J = 17.2, 10.3, 8.3$  Hz, 1H), 5.21 (d,  $J = 10.4$  Hz, 1H), 5.18 (d,  $J = 17.2$  Hz, 1H), 4.48 (dd,  $J = 18.3, 2.3$  Hz, 1H), 4.08 (ddd,  $J = 18.3, 2.3, 2.3$  Hz, 1H), 3.69 (s, 3H), 3.68 (dd,  $J = 9.3, 7.7$  Hz, 1H), 3.43-3.48 (m, 1H), 2.79 (dd,  $J = 9.3, 9.3$  Hz, 1H), 2.43 (s, 3H).  $^{13}\text{C}$ -NMR (125 MHz,  $\text{CDCl}_3$ )  $\delta$  ppm: 166.1, 160.1, 143.9, 134.1, 132.2, 129.8, 128.0, 119.8, 114.1, 52.4, 51.9, 51.4, 49.1, 21.5. HRMS (ESI, m/z): calcd. for  $\text{C}_{16}\text{H}_{20}\text{NO}_4\text{S}^+ [\text{M} + \text{H}]^+$ , 322.1108; found, 322.1098.

#### 5. Skeletal Rearrangement of **1a** using $\text{Me}_n\text{AlX}_{(3-n)}$ and Characterization of **5** and **7**

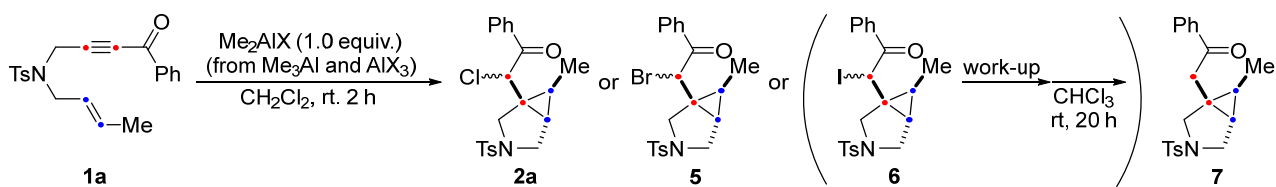

To a solution of  $\text{Me}_2\text{AlX}$ , which was generated from  $\text{Me}_3\text{Al}$  (1.4 M in hexane solution, 0.19 mL, 0.266 mmol) and  $\text{AlX}_3$  (X = Cl, 17.8 mg; X = Br, 35.5 mg; 0.133 mmol) at 60 °C for 30 min,<sup>2</sup> was added  $\text{CH}_2\text{Cl}_2$  (2 mL) and enynone **1a** (147.0 mg, 0.4 mmol) at 0 °C. After being stirred at room temperature for 2 h, the reaction mixture was quenched with sat.  $\text{NaHCO}_3$  and sat. Rochelle salt, and extracted with AcOEt. The organic layer was dried over  $\text{MgSO}_4$  and concentrated in vacuo to dryness. The residue was purified by MPLC (hexane:AcOEt = 88:12) to give **2a** (142.7 mg, 88%, 55:45) or **5** (164.2 mg, 91%, 50:50) as an epimeric mixture. The  $^1\text{H}$  NMR spectra of the obtained **2a** were identical to data of the above-mentioned **2a**.

**[The case of the iodinated **6**]** In the similar manner, the crude product including **6** were prepared from **1a** (147.0 mg, 0.4 mmol) using  $\text{Me}_3\text{Al}$  (1.4 M in hexane solution, 0.19 mL, 0.266 mmol) and  $\text{AlI}_3$  (54.3 mg, 0.133 mmol) in  $\text{CH}_2\text{Cl}_2$  (4 mL). Notably, the molecular ion peak of **6** (HRMS: m/z calcd. for  $\text{C}_{21}\text{H}_{23}\text{INO}_3\text{S}^+ [\text{M} + \text{H}]^+$ , 496.0438; found, 496.0443) was detected

<sup>2</sup> O. T. Beachley, Jr., L. Victoriano, *Organometallics* **1988**, *7*, 63–67.



in ESI-Mass spectrum of the crude product. After the above-mentioned work-up, the crude product (191.0 mg) was dissolved in  $\text{CHCl}_3$  (20 mL) and then the resulting solution was allowed to stand at rt for 20 h. During this time, the color of the solution changed from pale yellow to brown. Subsequently, the solution was quenched with 20%  $\text{Na}_2\text{S}_2\text{O}_3$  aq. and extracted with  $\text{CH}_2\text{Cl}_2$ . After the organic layer was dried over  $\text{MgSO}_4$  and concentrated in vacuo to dryness, the purification of the residue using MPLC (hexane:AcOEt = 88:12) afforded **7** (60.6 mg, 41%).

**2-Bromo-2-[(1*S*\*,5*S*\*,6*S*\*)-6-methyl-3-tosyl-3-azabicyclo[3.1.0]hexan-1-yl]-1-phenylethan-1-one (5):**  $R_f = 0.42$  (hexane:AcOEt = 2:1). Colorless amorphous. IR (neat)  $\nu$   $\text{cm}^{-1}$ ; 1685, 1341, 1165, 667, 548.  $^1\text{H}$  NMR (500 MHz,  $\text{CDCl}_3$ , 50:50 mixture of epimers)  $\delta$  ppm; 7.92 (d,  $J = 7.4$  Hz, 1H), 7.73 (d,  $J = 8.0$  Hz, 1H), 7.70 (d,  $J = 7.4$  Hz, 1H), 7.69 (d,  $J = 8.0$  Hz, 1H), 7.59 (t,  $J = 7.4$  Hz, 0.5H), 7.55 (t,  $J = 7.4$  Hz, 0.5H), 7.47 (dd,  $J = 7.4, 7.4$  Hz, 1H), 7.40 (dd,  $J = 7.4, 7.4$  Hz, 1H), 7.36 (d,  $J = 8.0$  Hz, 1H), 7.32 (d,  $J = 8.0$  Hz, 1H), 5.20 (s, 0.5H), 5.06 (s, 0.5H), 3.98 (d,  $J = 9.7$  Hz, 0.5H), 3.63 (d,  $J = 9.7$  Hz, 0.5H), 3.61 (d,  $J = 9.7$  Hz, 0.5H), 3.56 (d,  $J = 9.2$  Hz, 0.5H), 3.53 (d,  $J = 9.2$  Hz, 0.5H), 3.52 (d,  $J = 9.2$  Hz, 0.5H), 3.16 (dd,  $J = 9.2, 4.0$  Hz, 0.5H), 3.01 (dd,  $J = 9.7, 4.0$  Hz, 0.5H), 2.48 (s, 1.5H), 2.42 (s, 1.5H), 1.45-1.40 (m, 0.5H), 1.33-1.28 (m, 1H), 1.21 (d,  $J = 6.3$  Hz, 1.5H), 1.04-1.02 (m, 0.5H), 1.02 (d,  $J = 6.3$  Hz, 1.5H).  $^{13}\text{C}$ -NMR (125 MHz,  $\text{CDCl}_3$ , 50:50 mixture of epimers)  $\delta$  ppm; 192.01, 191.99, 143.4, 143.3, 134.6, 133.9, 133.7, 133.6, 133.5, 129.61, 129.59, 128.9, 128.70, 128.67, 128.5, 127.52, 127.49, 52.4, 51.6, 50.7, 49.7, 49.0, 47.1, 33.6, 33.1, 32.3, 32.2, 24.9, 21.6, 21.5, 20.6, 12.5, 11.5 (note that one carbon peak of each isomer overlaps with each other). HRMS (ESI,  $m/z$ ): calcd. for  $\text{C}_{21}\text{H}_{23}\text{BrNO}_3\text{S}^+ [\text{M} + \text{H}]^+$ , 448.0577; found, 448.0588.

**2-[(1*S*\*,5*S*\*,6*S*\*)-6-methyl-3-tosyl-3-azabicyclo[3.1.0]hexan-1-yl]-1-phenylethan-1-one (7):**  $R_f = 0.47$  (hexane:AcOEt = 2:1). Colorless amorphous. IR (neat)  $\nu$   $\text{cm}^{-1}$ ; 1686, 1340, 1164, 667.  $^1\text{H}$  NMR (500 MHz,  $\text{CDCl}_3$ )  $\delta$  ppm; 7.86 (d,  $J = 7.5$  Hz, 2H), 7.65 (d,  $J = 8.0$  Hz, 2H), 7.55 (t,  $J = 7.5$  Hz, 1H), 7.43 (dd,  $J = 7.5, 7.5$  Hz, 2H), 7.29 (d,  $J = 8.0$  Hz, 2H), 3.76 (d,  $J = 9.2$  Hz, 1H), 3.54 (d,  $J = 9.2$  Hz, 1H), 3.18 (dd,  $J = 9.2, 3.4$  Hz, 1H), 3.16 (d,  $J = 18.3$  Hz, 1H), 3.10 (d,  $J = 18.3$  Hz, 1H), 2.93 (d,  $J = 9.2$  Hz, 1H), 2.41 (s, 3H), 1.03-0.95 (m, 2H), 0.96 (d,  $J = 5.7$  Hz, 3H).  $^{13}\text{C}$ -NMR (125 MHz,  $\text{CDCl}_3$ )  $\delta$  ppm; 198.2, 143.2, 136.6, 133.7, 133.2, 129.5, 128.6, 127.7, 127.4, 54.3, 50.1, 37.7, 28.4, 27.7, 21.5, 18.5, 12.6. HRMS (ESI,  $m/z$ ): calcd. for  $\text{C}_{21}\text{H}_{24}\text{NO}_3\text{S}^+ [\text{M} + \text{H}]^+$ , 370.1471; found, 370.1478.

## 6. Quenching of Aluminum Enolate with Electrophiles and Characterization of **d-2a**, **8** and **9**

(a) Deuteration of aluminum enolate

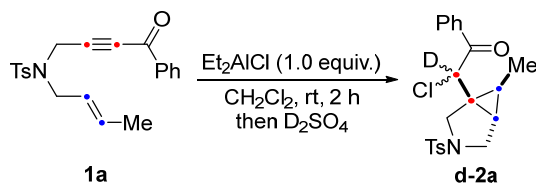

To a solution of enynone **1a** (73.5 mg, 0.2 mmol) in  $\text{CH}_2\text{Cl}_2$  (1 mL) was added  $\text{Et}_2\text{AlCl}$  (1.0 M in hexane solution, 0.2 mL, 0.2 mmol) at 0 °C. After being stirred at room temperature for 2 h,  $\text{D}_2\text{SO}_4$  (96-98 wt.% in  $\text{D}_2\text{O}$ , 99.5%D, 1 mL) was added at 0 °C. After being stirred at room temperature for 1 h, the reaction mixture was quenched with sat.  $\text{NaHCO}_3$  and sat. Rochelle salt, and extracted with AcOEt. The organic layer was dried over  $\text{MgSO}_4$  and concentrated in vacuo to dryness. The residue was purified by MPLC (hexane:AcOEt = 80:20) to give **d-2a** (82.1 mg, quant. >99%D) as an epimeric mixture (72:28).

**2-Chloro-2-[(1*S*\*,5*S*\*,6*S*\*)-6-methyl-3-tosyl-3-azabicyclo[3.1.0]hexan-1-yl]-1-phenylethan-1-one-2-*d* (d-2a):**  $R_f = 0.40$  (hexane:AcOEt = 2:1). White solid. Mp 157-162 °C. IR (KBr)  $\nu$   $\text{cm}^{-1}$ ; 1686, 1596, 1340, 1164, 667, 592, 549.  $^1\text{H}$  NMR (500 MHz,  $\text{CDCl}_3$ , 72:28 mixture of epimers)  $\delta$  ppm; 7.91 (d,  $J = 8.0$  Hz, 1.4H), 7.70 (d,  $J = 8.0$  Hz, 1.4H), 7.63 (d,  $J = 8.6$  Hz, 0.6H), 7.59 (t,  $J = 8.0$  Hz, 0.7H), 7.56-7.51 (m, 0.9H), 7.47 (dd,  $J = 8.0, 8.0$  Hz, 1.4H), 7.38-7.33 (m, 1.2H), 7.30 (d,  $J = 8.0$  Hz, 1.4H), 3.89 (d,  $J = 9.7$  Hz, 0.7H), 3.57-3.52 (m, 1.7H), 3.48 (d,  $J = 9.2$  Hz, 0.3H), 3.21 (d,  $J = 9.2$  Hz, 0.3H), 3.14 (dd,  $J = 9.7, 4.0$  Hz, 0.7H), 2.73 (dd,  $J = 9.2, 3.4$  Hz, 0.3H), 2.48 (s, 0.9H), 2.40 (s, 2.1H), 1.34 (dd,  $J = 4.0, 4.0$  Hz, 0.7H), 1.30-1.23 (m, 1H), 1.21 (d,  $J = 5.7$  Hz, 0.9H), 1.02-0.98 (m, 0.3H), 1.00 (d,  $J = 6.3$  Hz, 2.1H).  $^{13}\text{C}$ -NMR (125 MHz,  $\text{CDCl}_3$ , 72:28 mixture of epimers)  $\delta$  ppm; 192.9 (minor), 192.5 (major), 143.4 (minor), 143.3 (major), 135.3 (minor), 134.0 (major), 133.7 (major), 133.6 (major), 133.5 (minor), 132.9 (minor), 129.6, 128.81 (major), 128.77 (major), 128.6 (minor), 128.2 (minor), 127.5 (minor), 127.4 (major), 58.0 (t,  $J = 21.6$  Hz), 50.8 (minor), 50.2 (major), 50.1 (minor), 49.2 (major), 33.34 (major), 33.31 (minor), 31.8 (minor), 30.6 (major), 23.1 (major), 21.51 (minor), 21.46 (major), 20.4 (minor), 12.4 (major), 11.8 (minor). HRMS (ESI,  $m/z$ ): calcd. for  $\text{C}_{21}\text{H}_{22}\text{DCINO}_3\text{S}^+ [\text{M} + \text{H}]^+$ , 405.1144; found, 405.1137.

(b) Chlorination of aluminum enolate

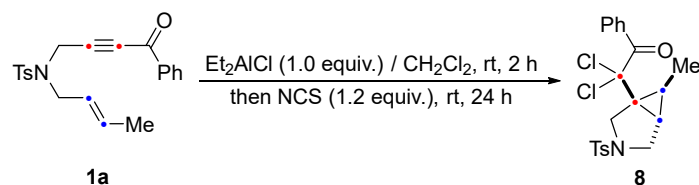

To a solution of enynone **1a** (147 mg, 0.4 mmol) in CH<sub>2</sub>Cl<sub>2</sub> (2 mL) was added Et<sub>2</sub>AlCl (1.0 M in hexane solution, 0.4 mL, 0.4 mmol) at 0 °C. After being stirred at room temperature for 2 h, *N*-chlorosuccinimide (NCS, 64.1 mg, 0.48 mmol) was added at 0 °C. After being stirred at room temperature for 24 h, the reaction mixture was quenched with sat. NaHCO<sub>3</sub> and sat. Rochelle salt, and extracted with AcOEt. The organic layer was dried over MgSO<sub>4</sub> and concentrated in vacuo to dryness. The residue was purified by MPLC (hexane:AcOEt = 80:20) to give **8** (126.2 mg, 72%).

**2,2-Dichloro-2-[(1S\*,5S\*,6S\*)-6-methyl-3-tosyl-3-azabicyclo[3.1.0]hexan-1-yl]-1-phenylethan-1-one (8):** *R*<sub>f</sub> = 0.55 (hexane:AcOEt = 2:1). Colorless amorphous. IR (neat)  $\nu$  cm<sup>-1</sup>; 1701, 1597, 1348, 1168, 667, 609, 550. <sup>1</sup>H NMR (500 MHz, CDCl<sub>3</sub>)  $\delta$  ppm; 8.05 (dd, *J* = 8.0, 1.1 Hz, 2H), 7.60 (d, *J* = 8.0 Hz, 2H), 7.53 (t, *J* = 7.4 Hz, 1H), 7.38 (dd, *J* = 8.0, 7.4 Hz, 2H), 7.28 (d, *J* = 8.0 Hz, 2H), 3.62 (d, *J* = 9.2 Hz, 1H), 3.55 (d, *J* = 9.2 Hz, 1H), 3.21 (dd, *J* = 9.2, 4.0 Hz, 1H), 3.18 (d, *J* = 9.2 Hz, 1H), 2.44 (s, 3H), 1.96 (dd, *J* = 5.2, 4.0 Hz, 1H), 1.42 (d, *J* = 6.3 Hz, 3H), 1.36 (dq, *J* = 6.3, 5.2 Hz, 1H). <sup>13</sup>C-NMR (125 MHz, CDCl<sub>3</sub>, 72:28 mixture of epimers)  $\delta$  ppm; 187.4, 143.5, 133.5, 133.3, 131.8, 130.6, 129.6, 128.1, 127.4, 89.4, 54.0, 50.2, 41.4, 32.2, 24.4, 21.5, 12.1. HRMS (ESI, *m/z*): calcd. for C<sub>21</sub>H<sub>22</sub>Cl<sub>2</sub>NO<sub>3</sub>S<sup>+</sup> [M + H]<sup>+</sup>, 438.0692; found, 438.0693.

(c) Acylation of aluminum enolate

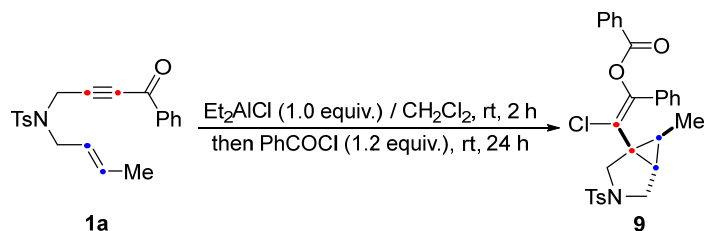

To a solution of enynone **1a** (147 mg, 0.4 mmol) in CH<sub>2</sub>Cl<sub>2</sub> (2 mL) was added Et<sub>2</sub>AlCl (1.0 M in hexane solution, 0.4 mL, 0.4 mmol) at 0 °C. After being stirred at room temperature for 2 h, benzoyl chloride (55.7  $\mu$ L, 0.48 mmol) was added at 0 °C. After being stirred at room temperature for 24 h, the reaction mixture was quenched with sat. NaHCO<sub>3</sub> and sat. Rochelle salt, and extracted with AcOEt. The organic layer was dried over MgSO<sub>4</sub> and concentrated in vacuo to dryness. The residue was purified by MPLC (hexane:AcOEt = 80:20) to give **9** (183.6 mg, 90%).

**(Z)-2-Chloro-2-[(1S\*,5S\*,6S\*)-6-methyl-3-tosyl-3-azabicyclo[3.1.0]hexan-1-yl]-1-phenylvinyl benzoate (9):** *R*<sub>f</sub> = 0.54 (hexane:AcOEt = 2:1). White solid. Mp 192 °C. IR (KBr)  $\nu$  cm<sup>-1</sup>; 1735, 1343, 1166, 667, 606, 546. <sup>1</sup>H NMR (500 MHz, CDCl<sub>3</sub>)  $\delta$  ppm; 8.11 (d, *J* = 8.0 Hz, 2H), 7.74 (d, *J* = 8.0 Hz, 2H), 7.60 (t, *J* = 7.4 Hz, 1H), 7.46 (dd, *J* = 8.0, 7.4 Hz, 2H), 7.41 (d, *J* = 8.0 Hz, 2H), 7.34-7.28 (m, 1H), 7.23-7.07 (m, 4H), 3.86 (d, *J* = 9.7 Hz, 1H), 3.43 (d, *J* = 9.2 Hz, 1H), 3.37 (d, *J* = 9.2 Hz, 1H), 2.95-2.85 (m, 1H), 2.49 (s, 3H), 1.23 (dq, *J* = 6.3, 5.2 Hz, 1H), 1.09-0.95 (m, 3H), 0.90-0.74 (m, 1H). <sup>13</sup>C-NMR (125 MHz, CDCl<sub>3</sub>)  $\delta$  ppm; 163.7, 146.9, 143.7, 134.1, 133.7, 133.5, 130.2, 129.7, 129.6, 129.0, 128.6, 128.4, 128.3, 127.8, 123.7, 54.6, 50.1, 36.0, 33.5, 24.1, 21.5, 12.6. HRMS (ESI, *m/z*): calcd. for C<sub>28</sub>H<sub>26</sub>ClNNO<sub>4</sub>S<sup>+</sup> [M + Na]<sup>+</sup>, 530.1163; found, 530.1160.

## 7. NOESY Spectra Analysis of *cis*-2a and 4m

*cis*-2a (major epimer)

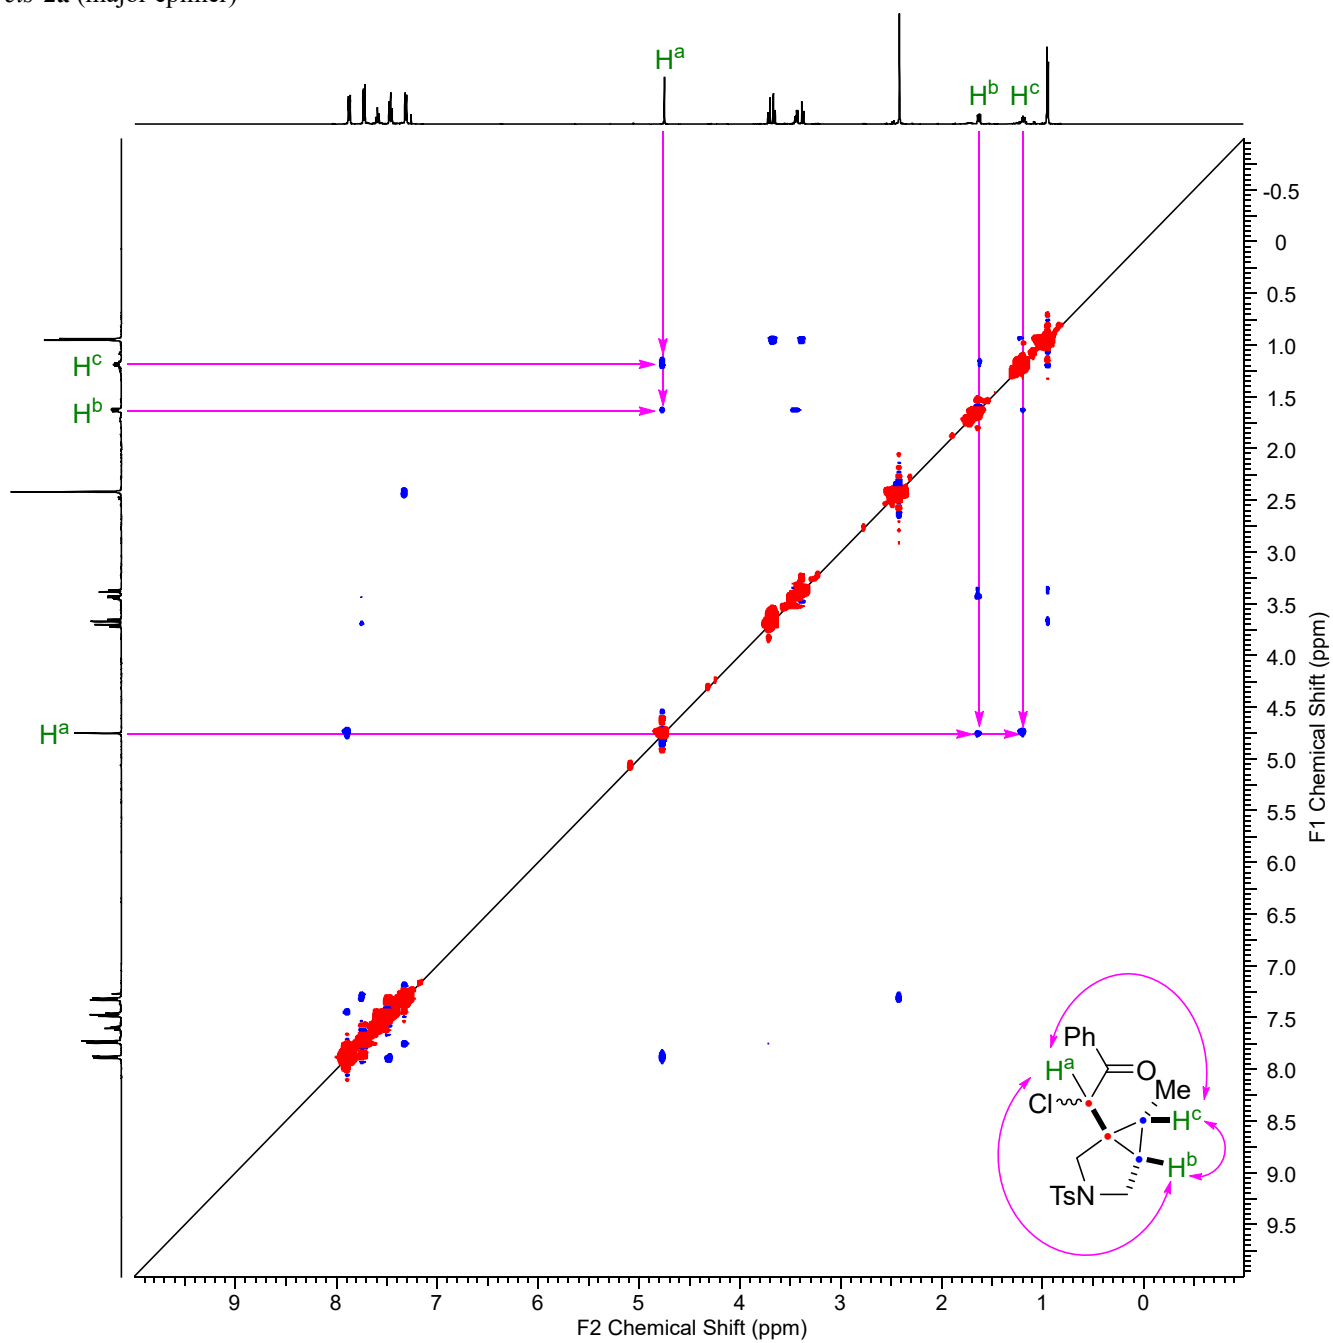

*cis*-**2a** (minor epimer)

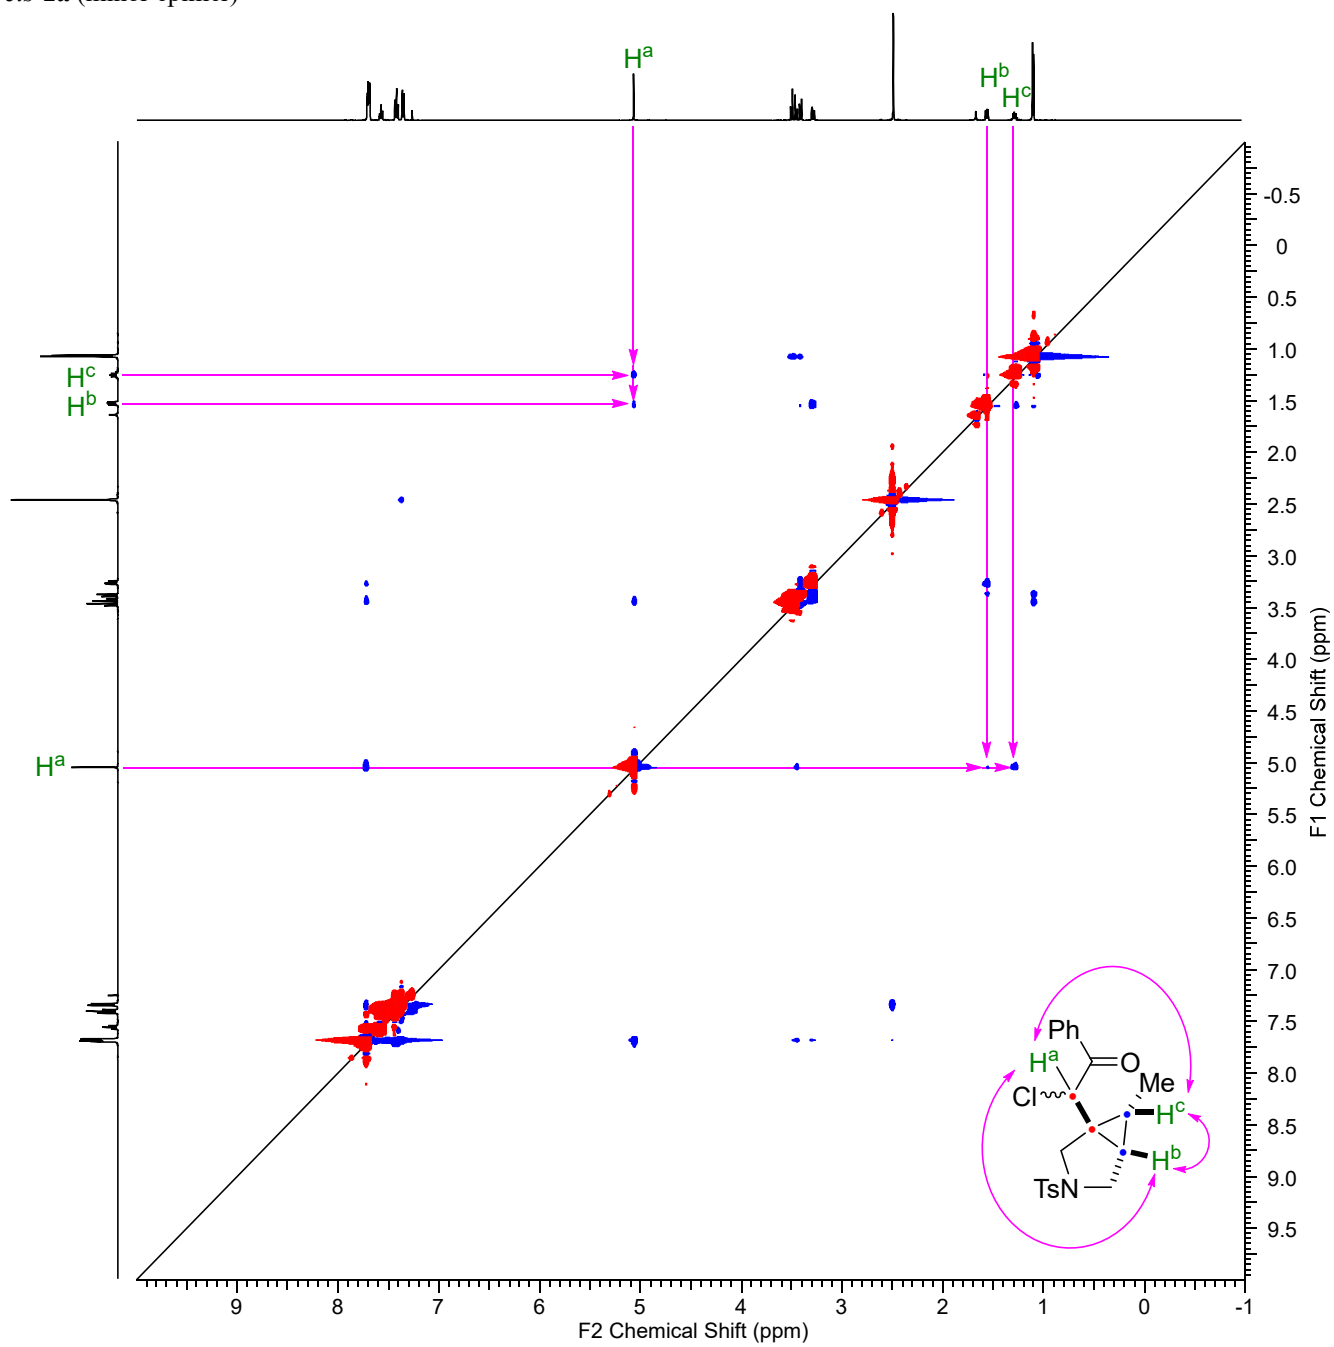

4m

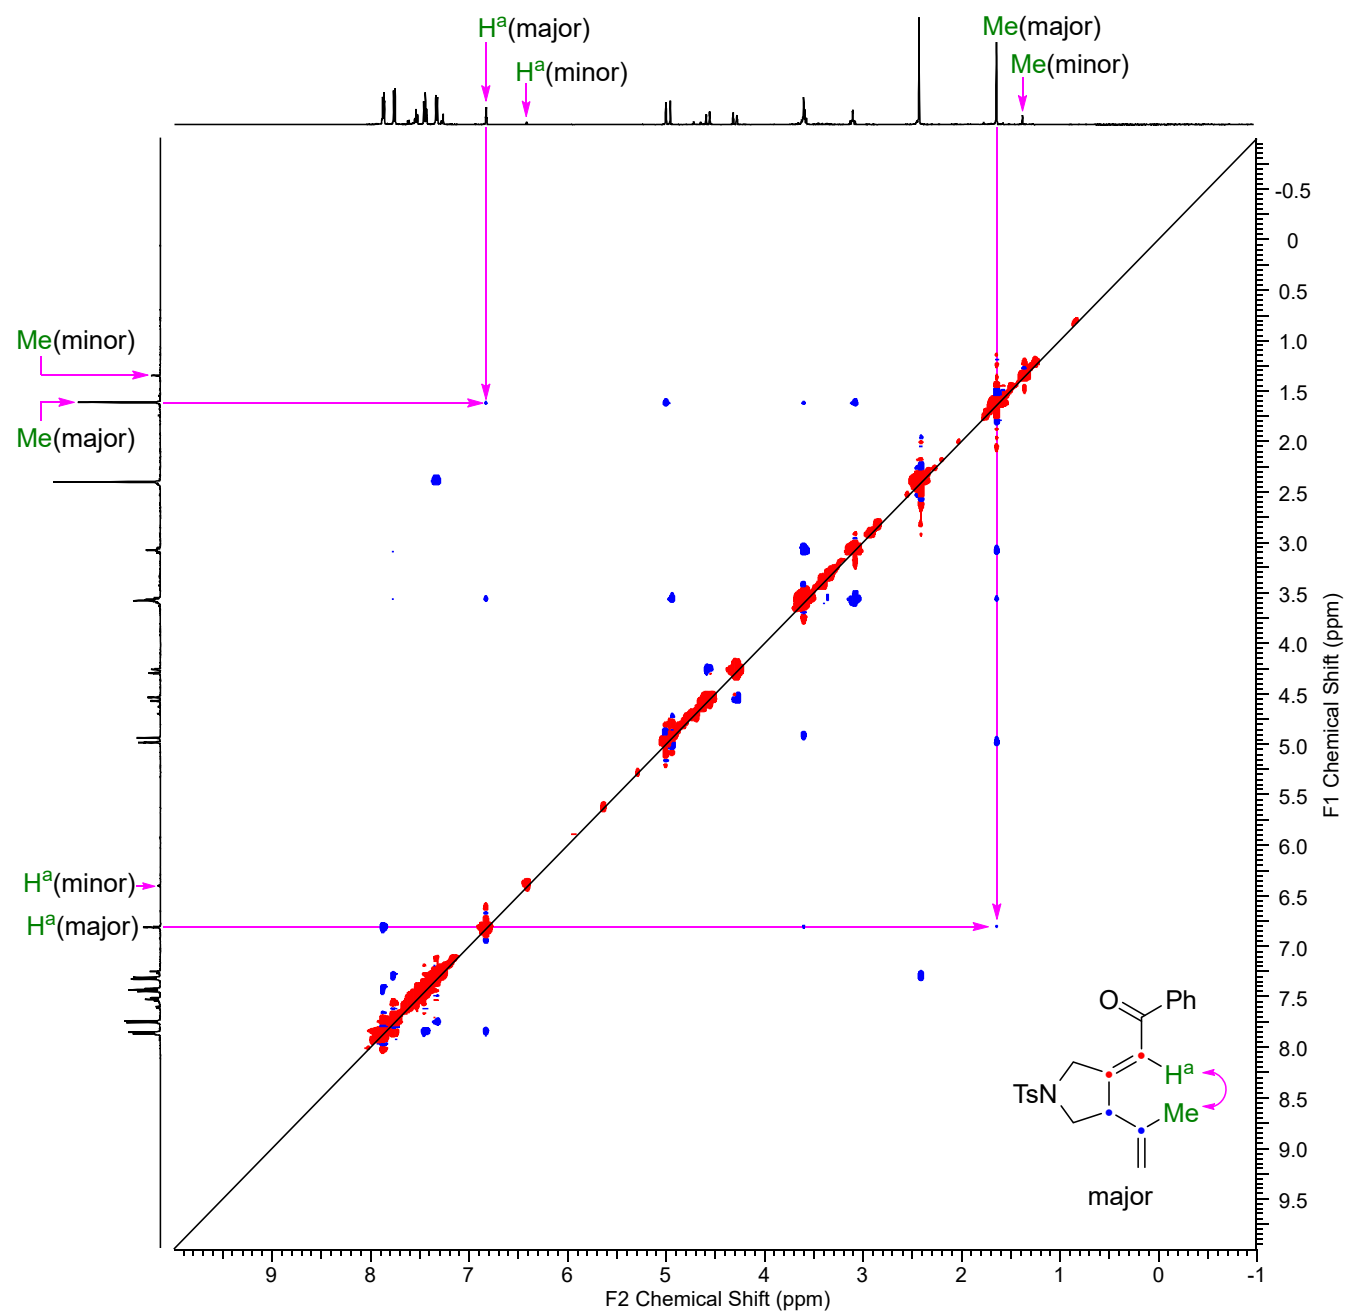

## 8. X-ray structure of 2a

Crystals were grown from a solution of **2a-major** in hexane-CH<sub>2</sub>Cl<sub>2</sub>. Crystal: colorless block (size: 0.60 x 0.25 x 0.15 mm). Formula: C<sub>21</sub>H<sub>22</sub>ClNO<sub>3</sub>S. Formula weight = 403.90. Crystal system: monoclinic. Space group: *P*2<sub>1</sub>/*c* (No. 14). Cell: *a* = 7.92368(14) Å, *b* = 37.6716(7) Å, *c* = 7.55990(14) Å,  $\alpha$  = 90°,  $\beta$  = 121.2790(7)°,  $\gamma$  = 90°, *V* = 1928.61(6) Å<sup>3</sup>, *Z* = 4.

*D*<sub>X</sub> = 1.391 Mg m<sup>-3</sup>,  $\mu$ (CuK $\alpha$ ) = 2.945 mm<sup>-1</sup>, *T* = 203(2) K.

The diffraction data were collected using graphite monochromatized CuK $\alpha$  radiation with Rigaku *R*-AXIS RAPID diffractometer ( $\omega$ -scan mode). The unit cell dimensions were determined using 31518 reflections with  $3.52 \leq \theta \leq 68.22^\circ$ . The diffraction data of 34311 within  $4.70 \leq \theta \leq 68.22^\circ$  were collected and merged to give 3519 unique reflections with the *R*int of 0.0475. The structure was solved by a direct method and refined on *F*<sup>2</sup> by a least-squares method by the programs SIR2004 and SHELXL2014, respectively. The final *R*(*F*) and the *wR*(*F*<sup>2</sup>) values are 0.0519 and 0.1367 for all reflections, respectively.

Crystals were grown from a solution of **2a-minor** in hexane-CH<sub>2</sub>Cl<sub>2</sub>. Crystal: colorless block (size: 0.45 x 0.45 x 0.30 mm). Formula: C<sub>21</sub>H<sub>22</sub>ClNO<sub>3</sub>S. Formula weight = 403.90. Crystal system: orthorhombic. Space group: *Pbca* (No. 61). Cell: *a* = 7.83618(14) Å, *b* = 18.4100(3) Å, *c* = 28.3095(5) Å,  $\alpha$  = 90°,  $\beta$  = 90°,  $\gamma$  = 90°, *V* = 4084.04(13) Å<sup>3</sup>, *Z* = 8.

*D*<sub>X</sub> = 1.314 Mg m<sup>-3</sup>,  $\mu$ (CuK $\alpha$ ) = 2.781 mm<sup>-1</sup>, *T* = 203(2) K.

The diffraction data were collected using graphite monochromatized CuK $\alpha$  radiation with Rigaku *R*-AXIS RAPID diffractometer ( $\omega$ -scan mode). The unit cell dimensions were determined using 66871 reflections with  $3.12 \leq \theta \leq 68.18^\circ$ . The diffraction data of 67774 within  $3.12 \leq \theta \leq 68.18^\circ$  were collected and merged to give 3735 unique reflections with the *R*int of 0.0446. The structure was solved by a direct method and refined on *F*<sup>2</sup> by a least-squares method by the programs SIR2004 and SHELXL2014, respectively. The final *R*(*F*) and the *wR*(*F*<sup>2</sup>) values are 0.0421 and 0.1065 for all reflections, respectively.

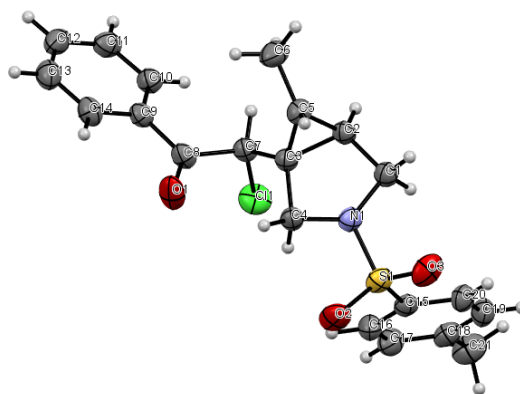

**Figure S1.** ORTEP representation of **2a-major** (CCDC 2210449), with thermal ellipsoids at the 50% probability level.

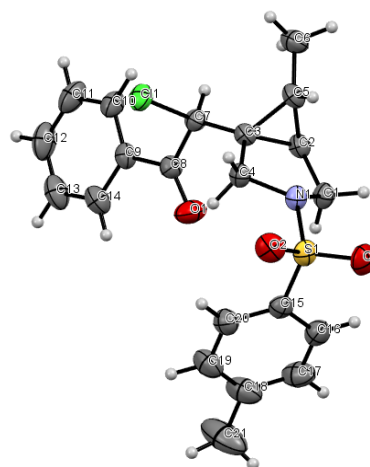

**Figure S2.** ORTEP representation of **2a-minor** (CCDC 2210451), with thermal ellipsoids at the 50% probability level.

## 9. Computational Details

All calculations were carried with the Gaussian 16 program package,<sup>3</sup> GRRM11,<sup>4</sup> and GRRM17<sup>5</sup> program. Structure optimizations were carried out at the M062X level<sup>6</sup> in the gas phase using the 6-31+G\* basis set for INT1a–INT4a' and INT2b. The vibrational frequencies were computed at the same level to check whether each optimized structure is an energy minimum (no imaginary frequency) or a transition state (one imaginary frequency) and to evaluate its zero-point vibrational energy (ZPVE) and thermal corrections at 298 K. Intrinsic reaction coordinates (IRC) were calculated to confirm the connection between the transition states and the reactants/products. The Gibbs free energy used for discussion in this study was calculated by adding the gas-phase Gibbs free energy correction.

<sup>3</sup> Gaussian 16, Revision C.01, Frisch, M. J.; Trucks, G. W.; Schlegel, H. B.; Scuseria, G. E.; Robb, M. A.; Cheeseman, J. R.; Scalmani, G.; Barone, V.; Petersson, G. A.; Nakatsuji, H.; Li, X.; Caricato, M.; Marenich, A. V.; Bloino, J.; Janesko, B. G.; Gomperts, R.; Mennucci, B.; Hratchian, H. P.; Ortiz, J. V.; Izmaylov, A. F.; Sonnenberg, J. L.; Williams-Young, D.; Ding, F.; Lipparini, F.; Egidi, F.; Goings, J.; Peng, B.; Petrone, A.; Henderson, T.; Ranasinghe, D.; Zakrzewski, V. G.; Gao, J.; Rega, N.; Zheng, G.; Liang, W.; Hada, M.; Ehara, M.; Toyota, K.; Fukuda, R.; Hasegawa, J.; Ishida, M.; Nakajima, T.; Honda, Y.; Kitao, O.; Nakai, H.; Vreven, T.; Throssell, K.; Montgomery, J. A., Jr.; Peralta, J. E.; Ogliaro, F.; Bearpark, M. J.; Heyd, J. J.; Brothers, E. N.; Kudin, K. N.; Staroverov, V. N.; Keith, T. A.; Kobayashi, R.; Normand, J.; Raghavachari, K.; Rendell, A. P.; Burant, J. C.; Iyengar, S. S.; Tomasi, J.; Cossi, M.; Millam, J. M.; Klene, M.; Adamo, C.; Cammi, R.; Ochterski, J. W.; Martin, R. L.; Morokuma, K.; Farkas, O.; Foresman, J. B.; Fox, D. J. Gaussian, Inc., Wallingford CT, 2016.

<sup>4</sup> Maeda, S.; Osada, Y.; Morokuma, K.; and Ohno, K. GRRM11, version 11.01, 2011.

<sup>5</sup> Maeda, S.; Harabuchi, Y.; Sumiya, Y.; Takagi, M.; Suzuki, K.; Hatanaka, M.; Osada, Y.; Taketsugu, T.; Morokuma, K.; Ohno, K. GRRM17, see [http://iqce.jp/GRRM/index\\_e.shtml](http://iqce.jp/GRRM/index_e.shtml) (accessed date 24 August, 2018); Maeda, S.; Ohno, K.; Morokuma, K. *Phys. Chem. Chem. Phys.* **2013**, *15*, 3683.

<sup>6</sup> Zhao, Y.; Truhlar, D. G. *Theor. Chem. Acc.* **2008**, *120*, 215–241.

## 10. Cartesian Coordinates and Absolute Electronic Energies of Intermediates and Transition States

### INT1a

Gibbs Free Energy = -2123.325031 A.U.

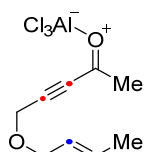

|    |             |             |             |
|----|-------------|-------------|-------------|
| O  | 3.66533008  | -0.90097265 | -0.56778708 |
| H  | 2.07408294  | -2.15391185 | -0.09716768 |
| H  | 3.54585687  | -2.31685058 | 0.87276601  |
| C  | 2.87545239  | -1.58964927 | 0.40023428  |
| C  | 3.02234923  | -0.65347550 | -1.78258627 |
| H  | 3.75012699  | -0.15807544 | -2.43041800 |
| C  | 2.29640844  | -0.66701726 | 1.43640038  |
| C  | 1.81070460  | 0.18620647  | -1.66745973 |
| C  | 0.76855056  | 0.79966866  | -1.59645979 |
| C  | -0.47237184 | 1.49977590  | -1.55966005 |
| O  | -1.45416575 | 1.06961960  | -0.93077464 |
| C  | -0.59049978 | 2.78816138  | -2.30353992 |
| H  | -0.26545064 | 2.64782255  | -3.33885931 |
| H  | 0.08759387  | 3.51807073  | -1.84681024 |
| H  | -1.61778893 | 3.14952189  | -2.26202174 |
| H  | 2.70459796  | -1.58968928 | -2.26974334 |
| H  | 1.58469390  | -1.12766197 | 2.12245034  |
| C  | 2.61052412  | 0.62197326  | 1.56152591  |
| H  | 3.32516978  | 1.05212828  | 0.85894249  |
| H  | 2.85625361  | 2.02222403  | 3.17293626  |
| C  | 2.05077821  | 1.53713161  | 2.60982941  |
| H  | 1.44729537  | 2.33333668  | 2.15637169  |
| H  | 1.41046216  | 0.99532849  | 3.31015792  |
| Al | -1.86612051 | -0.40423458 | 0.18466332  |
| Cl | -1.22544065 | 0.30853136  | 2.07077435  |
| Cl | -0.75177249 | -2.04558930 | -0.58346761 |
| Cl | -3.94874192 | -0.57363739 | -0.09207354 |

### TS1a

Gibbs Free Energy = -2123.311206 A.U.

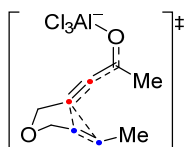

|   |             |             |             |
|---|-------------|-------------|-------------|
| O | 3.67269715  | -1.30212182 | -0.53324697 |
| H | 2.22961044  | -2.44981758 | 0.42688622  |
| H | 3.70805540  | -2.05309453 | 1.34499012  |
| C | 2.96736702  | -1.66476277 | 0.64043392  |
| C | 2.77490479  | -0.77510357 | -1.47398472 |
| H | 3.36589891  | -0.29335593 | -2.25585387 |
| C | 2.27257790  | -0.43912072 | 1.17417690  |
| C | 1.81628947  | 0.21830874  | -0.87522965 |
| C | 0.79063988  | 0.90628738  | -1.04798892 |
| C | -0.38319824 | 1.60495960  | -1.18767312 |

|    |             |             |             |
|----|-------------|-------------|-------------|
| O  | -1.52266129 | 1.08107676  | -0.93413801 |
| C  | -0.38710147 | 3.02131140  | -1.67465824 |
| H  | 0.61812396  | 3.37605622  | -1.90475958 |
| H  | -0.84113543 | 3.65247706  | -0.90383353 |
| H  | -1.01940846 | 3.08248450  | -2.56589031 |
| H  | 2.15463303  | -1.57050837 | -1.91361551 |
| H  | 1.29730682  | -0.55478479 | 1.64639177  |
| C  | 2.82432365  | 0.80047017  | 1.06173277  |
| H  | 3.82145579  | 0.88990771  | 0.62918892  |
| H  | 2.67984238  | 2.41709660  | 2.43995986  |
| C  | 2.15292541  | 2.03851262  | 1.55588563  |
| H  | 2.18650502  | 2.82695452  | 0.79556248  |
| H  | 1.11175972  | 1.84319986  | 1.82833864  |
| Al | -1.92463122 | -0.42119050 | 0.03983022  |
| Cl | -1.24490194 | 0.12138862  | 2.00571463  |
| Cl | -0.76584303 | -2.05704733 | -0.72305766 |
| Cl | -4.00905965 | -0.67528884 | -0.14076499 |

### INT2a

Gibbs Free Energy = -2123.326304 A.U.

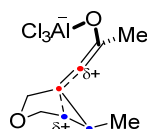

|    |             |             |             |
|----|-------------|-------------|-------------|
| O  | 3.61598830  | -1.38460408 | -0.57859169 |
| H  | 2.06217479  | -2.48083583 | 0.27826255  |
| H  | 3.45567529  | -2.07220153 | 1.33238165  |
| C  | 2.80365103  | -1.71332394 | 0.53140457  |
| C  | 2.83297430  | -0.58648751 | -1.44815614 |
| H  | 3.51696167  | -0.02015110 | -2.08439483 |
| C  | 2.08833275  | -0.43302244 | 0.92553998  |
| C  | 1.98987263  | 0.30594819  | -0.53809814 |
| C  | 0.79430409  | 0.83190939  | -0.84897284 |
| C  | -0.32628198 | 1.49120231  | -1.11224509 |
| O  | -1.54663673 | 1.04670527  | -0.95693113 |
| C  | -0.18255359 | 2.89280490  | -1.65472994 |
| H  | 0.86075701  | 3.19340676  | -1.77676275 |
| H  | -0.68563970 | 3.57598945  | -0.96465411 |
| H  | -0.69005459 | 2.93394840  | -2.62265701 |
| H  | 2.16102122  | -1.19916177 | -2.06267733 |
| H  | 1.14855055  | -0.48705355 | 1.47171277  |
| C  | 2.76190873  | 0.82524289  | 0.77966280  |
| H  | 3.82530743  | 0.78253660  | 0.54392999  |
| H  | 2.73541276  | 2.15669330  | 2.43917157  |
| C  | 2.24867761  | 2.06477911  | 1.46317028  |
| H  | 2.47830979  | 2.96095671  | 0.88011823  |
| H  | 1.16903037  | 2.00631920  | 1.62663108  |
| Al | -1.97821494 | -0.38545144 | 0.04767033  |
| Cl | -1.31270128 | 0.14741936  | 2.03079837  |
| Cl | -0.67488768 | -1.94819568 | -0.68615241 |
| Cl | -4.03739491 | -0.77759920 | -0.13529795 |

**TS2a**

Gibbs Free Energy = -2123.320176 A.U.

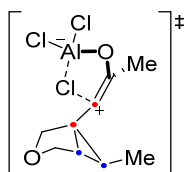

|    |             |             |             |
|----|-------------|-------------|-------------|
| O  | -3.37932300 | -1.75678000 | 0.75260200  |
| H  | -2.39622300 | -2.54496400 | -0.90670100 |
| H  | -4.11909000 | -2.09233500 | -1.11319100 |
| C  | -3.17178700 | -1.81256400 | -0.64604500 |
| C  | -2.30932800 | -1.01342700 | 1.30971600  |
| H  | -2.64165300 | -0.62320400 | 2.27461800  |
| C  | -2.70345200 | -0.42108600 | -1.04395400 |
| C  | -2.00541100 | 0.07855800  | 0.28220800  |
| C  | -0.80996800 | 0.73882100  | 0.20209400  |
| C  | 0.19353700  | 1.53958400  | 0.55349400  |
| O  | 1.45736000  | 1.47316900  | 0.24809600  |
| C  | -0.22990300 | 2.72654700  | 1.39678100  |
| H  | -1.29831500 | 2.73321300  | 1.62278400  |
| H  | 0.03726400  | 3.63724400  | 0.85337400  |
| H  | 0.34345800  | 2.68749500  | 2.32705600  |
| H  | -1.41173500 | -1.63221300 | 1.44359100  |
| H  | -2.12207000 | -0.28945300 | -1.95190500 |
| C  | -3.29289800 | 0.73068300  | -0.39501800 |
| H  | -4.14438400 | 0.53650400  | 0.25678800  |
| H  | -3.21771800 | 2.88196100  | -0.22657300 |
| C  | -3.19720100 | 2.10688600  | -0.99784300 |
| H  | -2.28234200 | 2.22001500  | -1.58521800 |
| H  | -4.05275000 | 2.26639100  | -1.66182600 |
| Al | 2.23417400  | -0.11678700 | -0.10146000 |
| Cl | 0.61053300  | -0.98848800 | -1.28010200 |
| Cl | 2.35128400  | -1.17019300 | 1.74287700  |
| Cl | 4.02615100  | 0.15647200  | -1.16795200 |

**INT3a**

Gibbs Free Energy = -2123.343355 A.U.

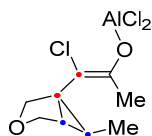

|   |             |             |             |
|---|-------------|-------------|-------------|
| O | -4.03624898 | -1.23185491 | 0.50388824  |
| H | -3.32135415 | -2.57645208 | -0.91793663 |
| H | -4.65979027 | -1.49855905 | -1.41264616 |
| C | -3.72761788 | -1.55675293 | -0.84462259 |
| C | -2.85059261 | -0.76707467 | 1.12332981  |
| H | -3.14459849 | -0.12333248 | 1.95831708  |
| C | -2.67948048 | -0.54305332 | -1.26359806 |
| C | -2.06853258 | -0.04114846 | 0.02955906  |
| C | -0.63004181 | 0.17345534  | 0.21558383  |
| C | 0.03779116  | 1.17940135  | 0.81364554  |
| O | 1.36506425  | 1.20802686  | 0.92738102  |
| C | -0.66606985 | 2.35671597  | 1.41793941  |

|    |             |             |             |
|----|-------------|-------------|-------------|
| H  | -1.75013253 | 2.28097664  | 1.32021759  |
| H  | -0.31599666 | 3.27405136  | 0.93431030  |
| H  | -0.40082185 | 2.41728851  | 2.47803107  |
| H  | -2.24743820 | -1.60439141 | 1.50784234  |
| H  | -2.04639687 | -0.74525499 | -2.12382816 |
| C  | -2.90527724 | 0.87440353  | -0.85091237 |
| H  | -3.89100124 | 1.09862016  | -0.44257309 |
| H  | -2.12864917 | 2.88800826  | -1.04755548 |
| C  | -2.25671027 | 1.98136744  | -1.64751915 |
| H  | -1.27116564 | 1.67989625  | -2.01581716 |
| H  | -2.87809249 | 2.23533061  | -2.51212172 |
| Al | 2.42080242  | 0.01210442  | 0.20186456  |
| Cl | 0.43458956  | -1.17484521 | -0.37430613 |
| Cl | 3.51373989  | -1.20769963 | 1.50325089  |
| Cl | 3.31901860  | 0.54748296  | -1.61446509 |

**TS2a'**

Gibbs Free Energy = -2123.315828 A.U.

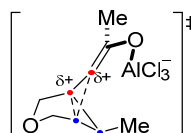

|    |             |             |             |
|----|-------------|-------------|-------------|
| O  | 3.37829082  | -1.52739045 | -0.79555624 |
| H  | 1.36277302  | -1.98899784 | -1.11552300 |
| H  | 2.13237451  | -2.67886609 | 0.34053173  |
| C  | 2.07536151  | -1.80003259 | -0.30509100 |
| C  | 3.39843711  | -0.19469571 | -1.27094318 |
| H  | 4.43786462  | 0.14043166  | -1.28667122 |
| C  | 1.65861716  | -0.56437703 | 0.48140790  |
| C  | 2.55815016  | 0.60594430  | -0.26524417 |
| C  | 1.25769412  | 0.92486535  | -0.54480346 |
| C  | 0.13495466  | 1.40852288  | -1.08454747 |
| O  | -1.02596062 | 0.81805973  | -1.12134487 |
| C  | 0.19589155  | 2.78539714  | -1.69599438 |
| H  | 1.20185810  | 3.20972314  | -1.67636289 |
| H  | -0.48784706 | 3.43757597  | -1.14485557 |
| H  | -0.15669114 | 2.71527921  | -2.72894681 |
| H  | 2.95036628  | -0.11060363 | -2.26813693 |
| H  | 0.68851419  | -0.49696047 | 0.98172698  |
| C  | 2.76788978  | 0.24496619  | 1.16392284  |
| H  | 3.68737768  | -0.31861911 | 1.31353635  |
| H  | 2.13921915  | 0.58323008  | 3.18876203  |
| C  | 2.34074550  | 1.16300292  | 2.28429856  |
| H  | 3.13415035  | 1.88320178  | 2.50146019  |
| H  | 1.42849946  | 1.70450583  | 2.01967120  |
| Al | -1.98874011 | -0.18841393 | 0.00462636  |
| Cl | -1.36884949 | 0.52188838  | 1.95234750  |
| Cl | -1.29884906 | -2.21586311 | -0.21188535 |
| Cl | -4.03394526 | 0.07977839  | -0.43197109 |

**INT3a'**

Gibbs Free Energy = -2123.316843 A.U.



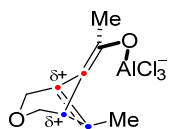

|    |             |             |             |
|----|-------------|-------------|-------------|
| O  | 3.33195898  | -1.48509130 | -0.82132236 |
| H  | 1.32702287  | -1.89361351 | -1.24487772 |
| H  | 2.01290441  | -2.63319450 | 0.22903665  |
| C  | 1.99921755  | -1.73856954 | -0.39474039 |
| C  | 3.43683490  | -0.13539740 | -1.23464769 |
| H  | 4.49147775  | 0.14654429  | -1.19081169 |
| C  | 1.55605254  | -0.50111163 | 0.39449135  |
| C  | 2.59155102  | 0.65186075  | -0.22408442 |
| C  | 1.22334215  | 0.81386455  | -0.47765007 |
| C  | 0.15939193  | 1.35715549  | -1.09425042 |
| O  | -1.03177285 | 0.82602004  | -1.13233410 |
| C  | 0.29404303  | 2.69235670  | -1.77301445 |
| H  | 1.31969291  | 3.06669014  | -1.75316057 |
| H  | -0.36628986 | 3.40972569  | -1.27682617 |
| H  | -0.04312959 | 2.59011255  | -2.80876925 |
| H  | 3.03389311  | 0.01683152  | -2.24251397 |
| H  | 0.74561702  | -0.54035768 | 1.13247642  |
| C  | 2.77549833  | 0.27602509  | 1.16266045  |
| H  | 3.64186262  | -0.35934376 | 1.34133091  |
| H  | 2.02944476  | 0.48210817  | 3.16816176  |
| C  | 2.29262583  | 1.11632896  | 2.31786376  |
| H  | 3.09309759  | 1.79460342  | 2.62750645  |
| H  | 1.41300664  | 1.70147975  | 2.03808733  |
| Al | -1.97517082 | -0.18323377 | 0.00691542  |
| Cl | -1.35898104 | 0.52194526  | 1.96201814  |
| Cl | -1.28743970 | -2.21481294 | -0.19664598 |
| Cl | -4.02697721 | 0.07288019  | -0.41074354 |

### TS3a'

Gibbs Free Energy = -2123.31428 A.U.

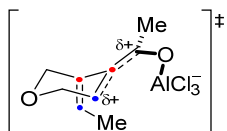

|   |             |             |             |
|---|-------------|-------------|-------------|
| O | 0.88438262  | 0.94740688  | -0.35133470 |
| H | -0.87754180 | 0.18426657  | 0.45593038  |
| H | 0.54797471  | -0.89838211 | 0.45121672  |
| C | 0.20890152  | 0.12773293  | 0.59023132  |
| C | 0.80310457  | 2.28765650  | 0.09471790  |
| H | 1.56620464  | 2.86135088  | -0.43656026 |
| C | 0.53380884  | 0.64616348  | 2.00012273  |
| C | 1.05792644  | 2.23375192  | 1.60280322  |
| C | -0.06101840 | 1.89246473  | 2.48239689  |
| C | -0.92948577 | 2.39525354  | 3.38496031  |
| O | -1.74743476 | 1.66646112  | 4.10020262  |
| C | -1.04572924 | 3.87641170  | 3.60300813  |
| H | -0.37158867 | 4.44204624  | 2.95568319  |
| H | -2.07858846 | 4.18422386  | 3.41426640  |
| H | -0.82250757 | 4.10075574  | 4.65074849  |
| H | -0.18956917 | 2.71494208  | -0.09122286 |
| H | 1.01854373  | -0.01721800 | 2.72127927  |

|    |             |             |            |
|----|-------------|-------------|------------|
| C  | 2.31550271  | 1.80114507  | 2.01403344 |
| H  | 3.04364369  | 1.62101008  | 1.21879007 |
| H  | 3.49158284  | 2.53669259  | 3.57577043 |
| C  | 2.79893206  | 1.69910525  | 3.41601199 |
| H  | 1.98506095  | 1.76519899  | 4.14141414 |
| H  | 3.36750471  | 0.77866954  | 3.57595564 |
| Al | -1.61717816 | -0.04686108 | 4.59757426 |
| Cl | -3.11661926 | -0.45682232 | 6.02432657 |
| Cl | -1.76339974 | -1.25761124 | 2.81182249 |
| Cl | 0.40701849  | -0.24802238 | 5.34704183 |

### INT4a'

Gibbs Free Energy = -2123.386482 A.U.

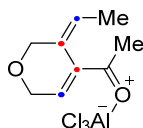

|    |             |             |             |
|----|-------------|-------------|-------------|
| O  | 1.74914938  | 0.61684624  | 0.13481940  |
| H  | -0.10516367 | 0.11442891  | -0.64256659 |
| H  | 0.65961276  | -1.05396051 | 0.44771603  |
| C  | 0.48718218  | 0.01606445  | 0.28470525  |
| C  | 1.72749891  | 2.02135369  | 0.34051101  |
| H  | 2.73461880  | 2.37911727  | 0.12048541  |
| C  | -0.32136373 | 0.55500638  | 1.41910708  |
| C  | 1.33665283  | 2.30846168  | 1.76926346  |
| C  | 0.07848609  | 1.62694619  | 2.13834474  |
| C  | -0.87187485 | 2.17052808  | 3.11263330  |
| O  | -1.59034640 | 1.43471824  | 3.82113207  |
| C  | -1.10811115 | 3.64461527  | 3.22214561  |
| H  | -0.40350508 | 4.22257346  | 2.62568260  |
| H  | -2.13047239 | 3.83248256  | 2.87413093  |
| H  | -1.06502776 | 3.94470896  | 4.27306409  |
| H  | 1.01877060  | 2.48801319  | -0.36338234 |
| H  | -1.27976314 | 0.07313099  | 1.60668400  |
| C  | 2.12190988  | 2.99296337  | 2.61159995  |
| H  | 3.03456599  | 3.42215999  | 2.19819886  |
| H  | 1.59381696  | 4.21555562  | 4.31541508  |
| C  | 1.91483304  | 3.19214381  | 4.08348008  |
| H  | 1.18849697  | 2.49057623  | 4.50674914  |
| H  | 2.85899963  | 3.02769546  | 4.61173617  |
| Al | -1.62097626 | -0.29677621 | 4.53437157  |
| Cl | -2.42438155 | 0.01181096  | 6.45962267  |
| Cl | -2.87027377 | -1.36590211 | 3.18500944  |
| Cl | 0.42094072  | -0.89042537 | 4.50670501  |

### INT2b

Gibbs Free Energy = -824.642142 A.U.

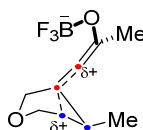

|   |             |             |             |
|---|-------------|-------------|-------------|
| O | 0.96822289  | 0.71224603  | -0.37014823 |
| H | -0.25126064 | -0.67323427 | 0.60429597  |

|   |             |             |             |       |             |             |            |
|---|-------------|-------------|-------------|-------|-------------|-------------|------------|
| H | 1.47456263  | -1.11091473 | 0.38257393  | H     | 0.65037506  | -0.08828723 | 2.85027466 |
| C | 0.77919416  | -0.29639483 | 0.60375712  | C     | 2.06794618  | 1.38512916  | 2.03873561 |
| C | 0.36105045  | 1.89417705  | 0.12352286  | H     | 2.71419743  | 1.51638314  | 1.17112869 |
| H | 0.82471516  | 2.74003234  | -0.38960576 | H     | 2.89905342  | 2.85013349  | 3.38682080 |
| C | 1.07448093  | 0.34345285  | 1.94584414  | C     | 2.61862538  | 1.79299535  | 3.38141436 |
| C | 0.62177567  | 1.89387563  | 1.62934056  | H     | 1.88779848  | 1.61105663  | 4.17421374 |
| C | -0.24951659 | 2.32386354  | 2.56193492  | H     | 3.51109992  | 1.19922620  | 3.60062402 |
| C | -0.90734612 | 2.73424370  | 3.63997889  | B     | -1.78771133 | 0.54341078  | 4.07265865 |
| O | -1.77369187 | 2.03538628  | 4.32196962  | F     | -0.55610841 | 0.03868396  | 4.53318945 |
| C | -0.66531288 | 4.14718684  | 4.10616562  | F     | -2.85996843 | 0.01311564  | 4.72247630 |
| H | 0.06554657  | 4.67300482  | 3.48742536  | F     | -1.83484821 | 0.35202119  | 2.67369424 |
| H | -0.31453902 | 4.10726817  | 5.14103088  | ----- |             |             |            |
| H | -1.61756501 | 4.68422766  | 4.07976548  |       |             |             |            |
| H | -0.72212271 | 1.89380235  | -0.05113391 |       |             |             |            |

# 11. $^1\text{H}$ and $^{13}\text{C}$ NMR Spectra of Compounds 2a-2l, 4m, 4n, 5, 6 and d-2a

$^1\text{H}$  NMR (500 MHz,  $\text{CDCl}_3$ ) of **2a** (major epimer)

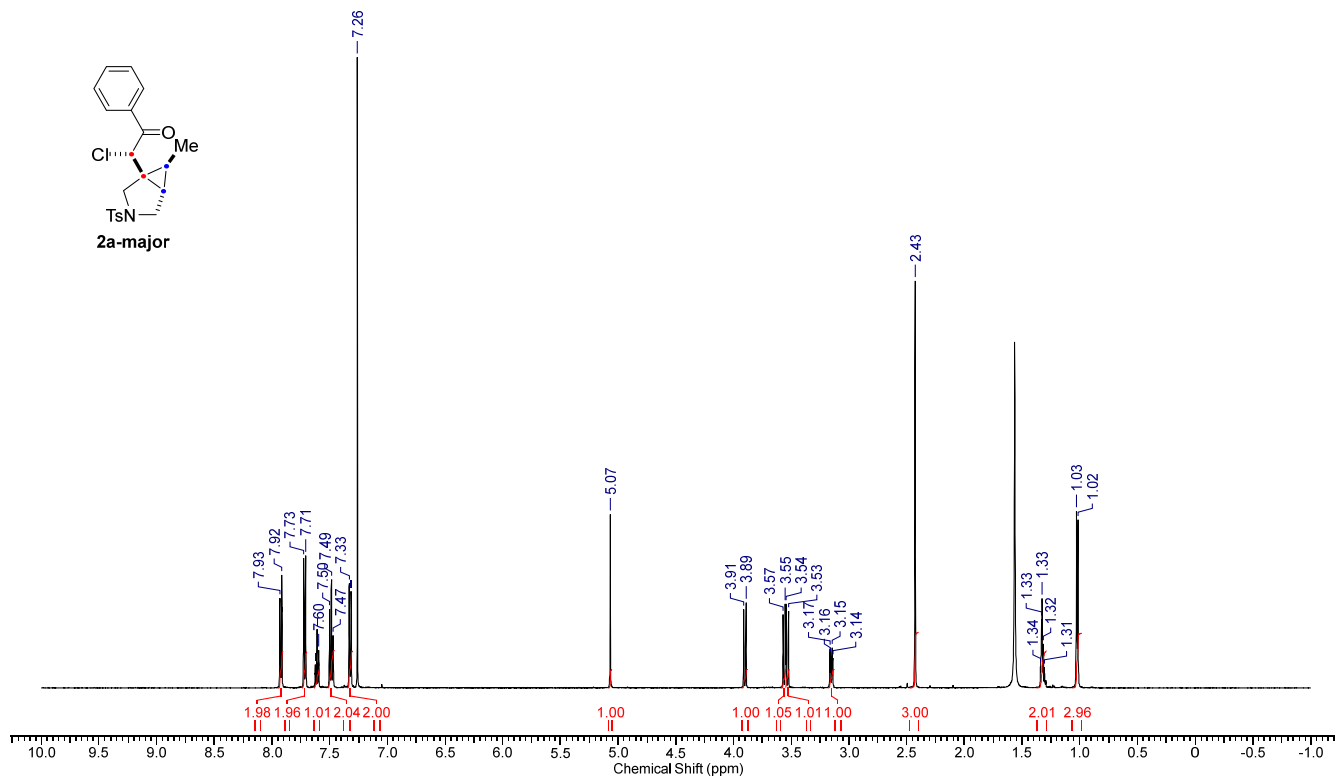

$^{13}\text{C}$  NMR (125 MHz,  $\text{CDCl}_3$ ) of **2a** (major epimer)

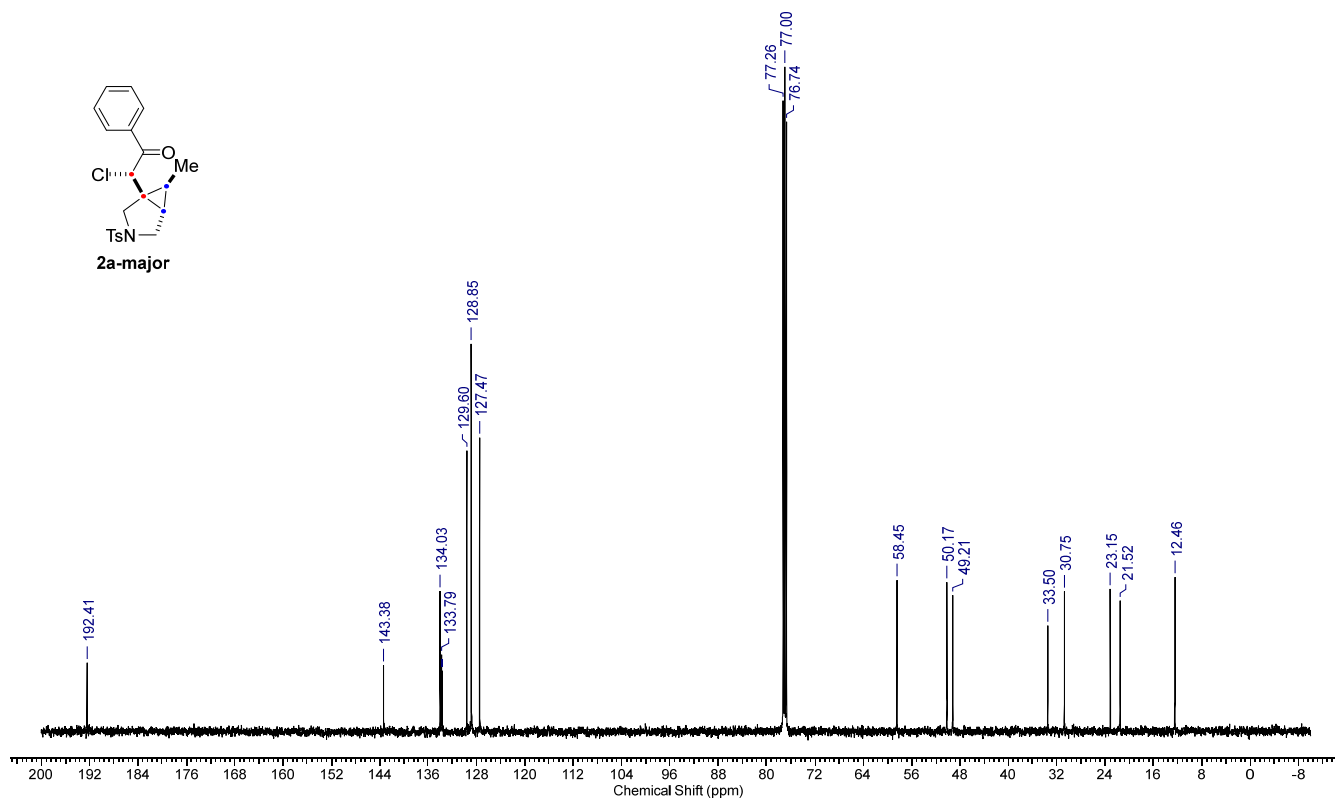

<sup>1</sup>H NMR (500 MHz, CDCl<sub>3</sub>) of **2a** (minor epimer)

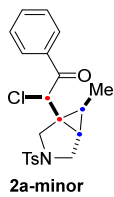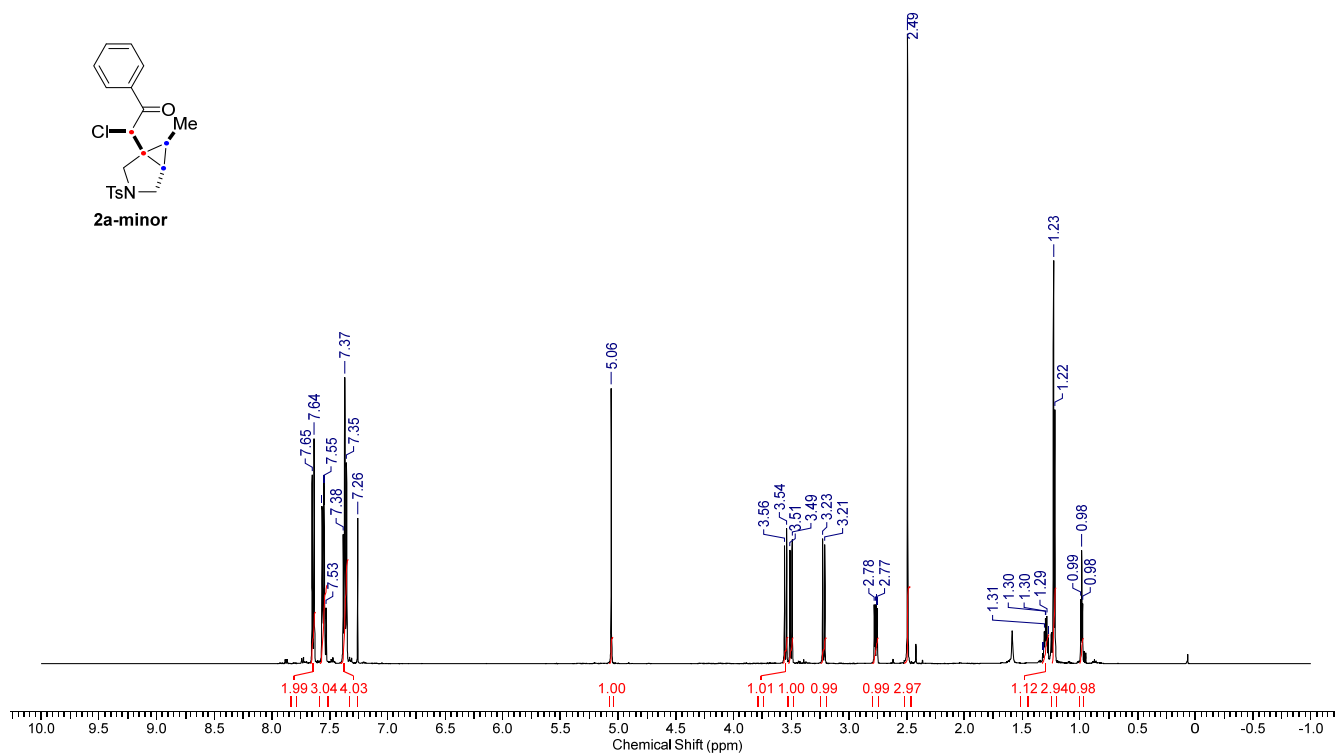

<sup>13</sup>C NMR (125 MHz, CDCl<sub>3</sub>) of **2a** (minor epimer)

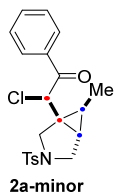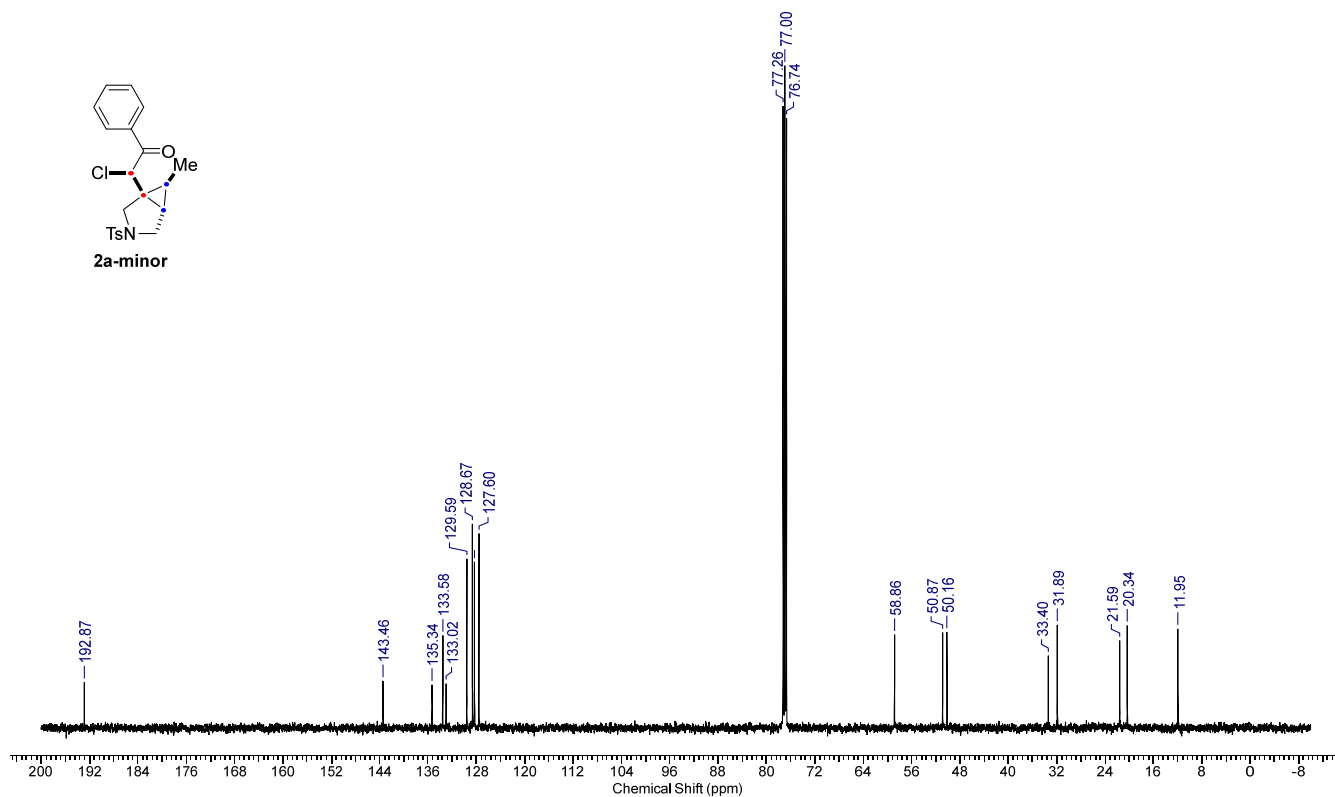

$^1\text{H}$  NMR (500 MHz,  $\text{CDCl}_3$ ) of **2b** (major epimer-rich)

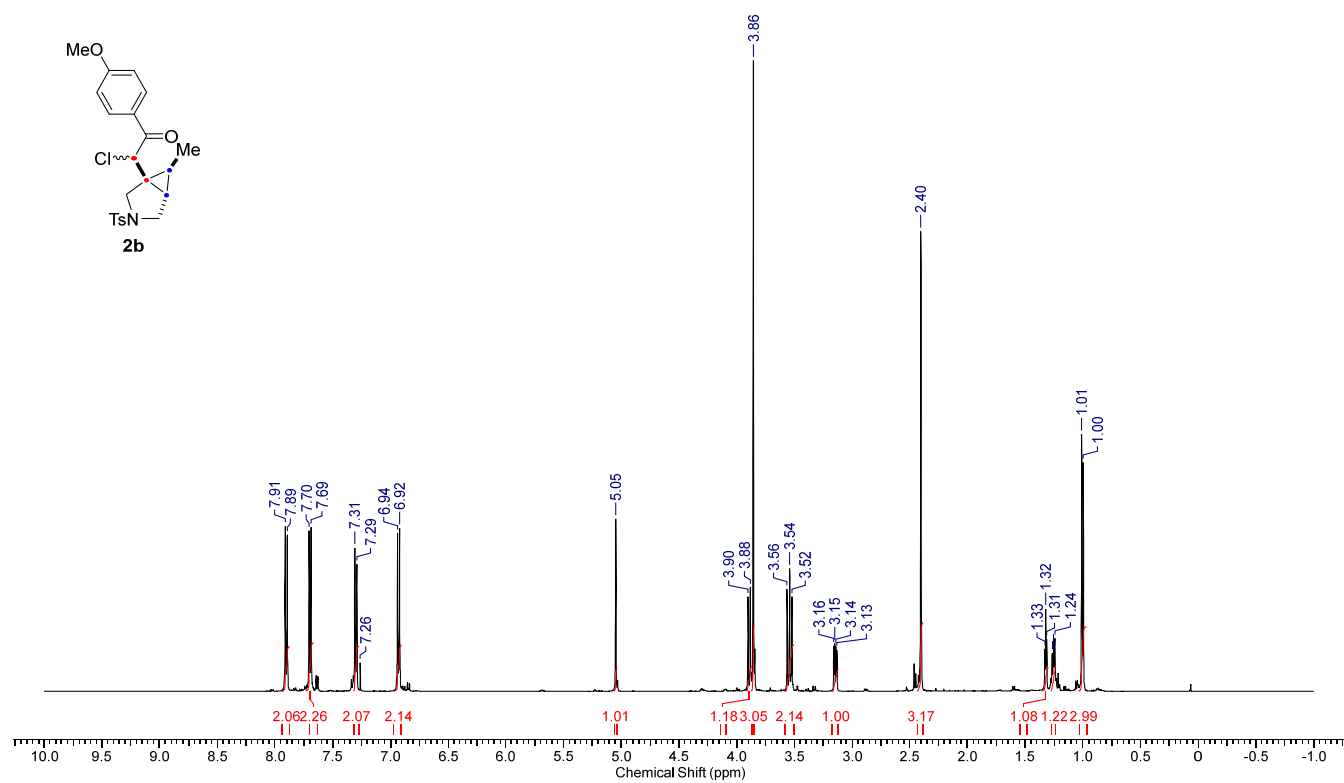

$^{13}\text{C}$  NMR (125 MHz,  $\text{CDCl}_3$ ) of **2b** (major epimer-rich)

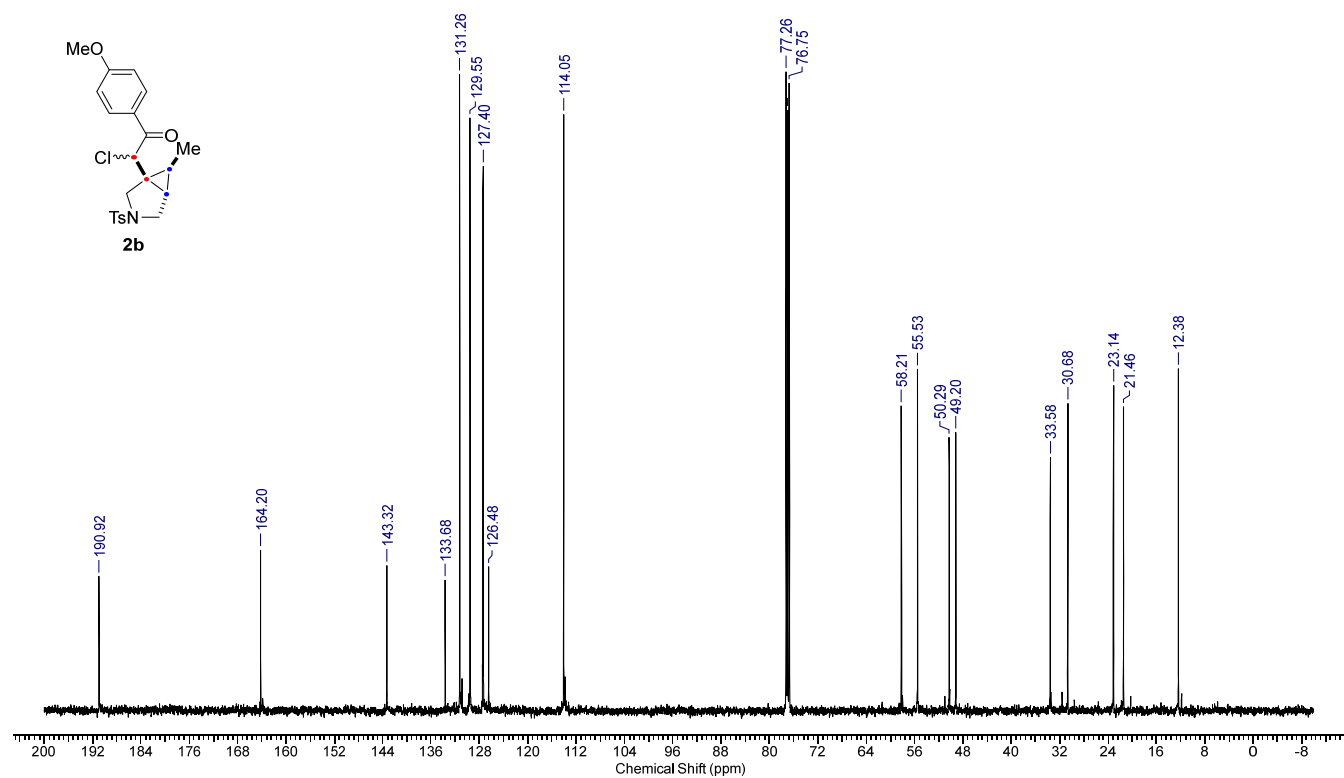

<sup>1</sup>H NMR (500 MHz, CDCl<sub>3</sub>) of **2b** (minor epimer-rich)

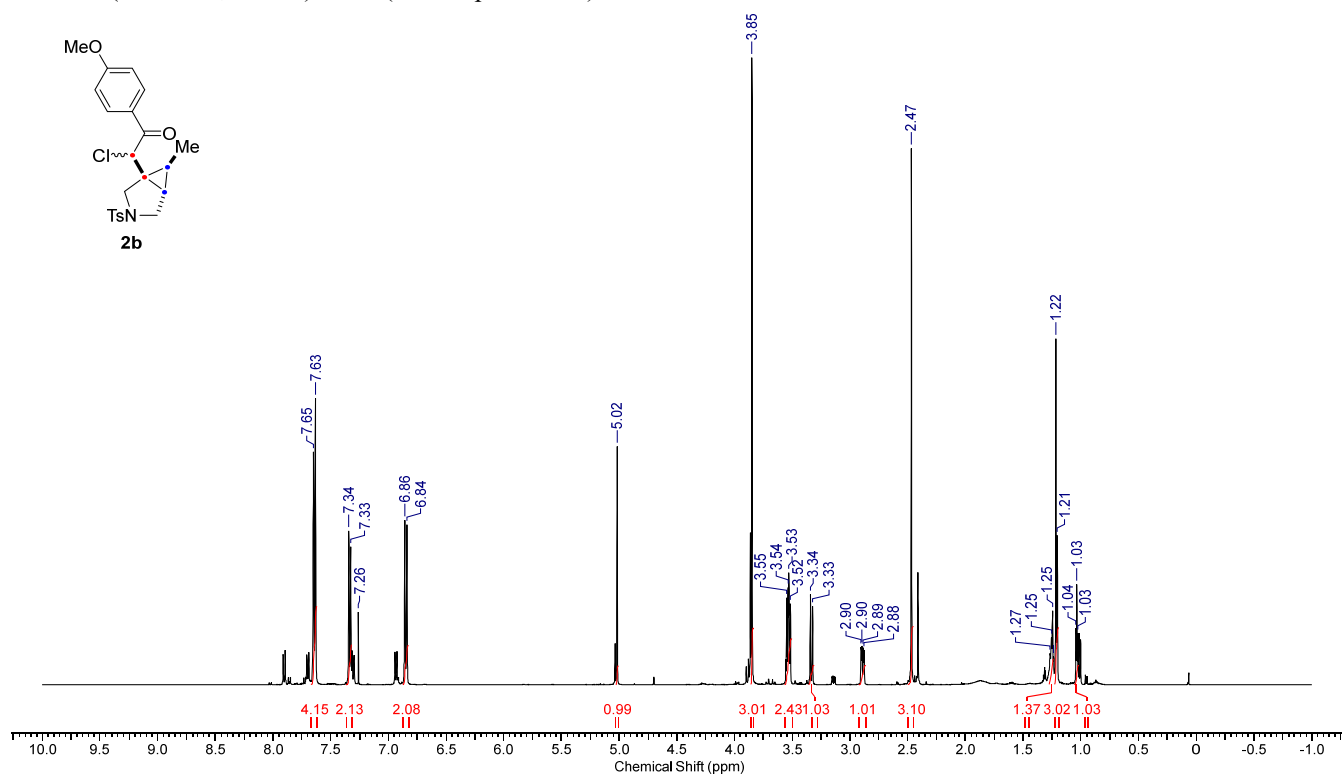

<sup>13</sup>C NMR (125 MHz, CDCl<sub>3</sub>) of **2b** (minor epimer-rich)

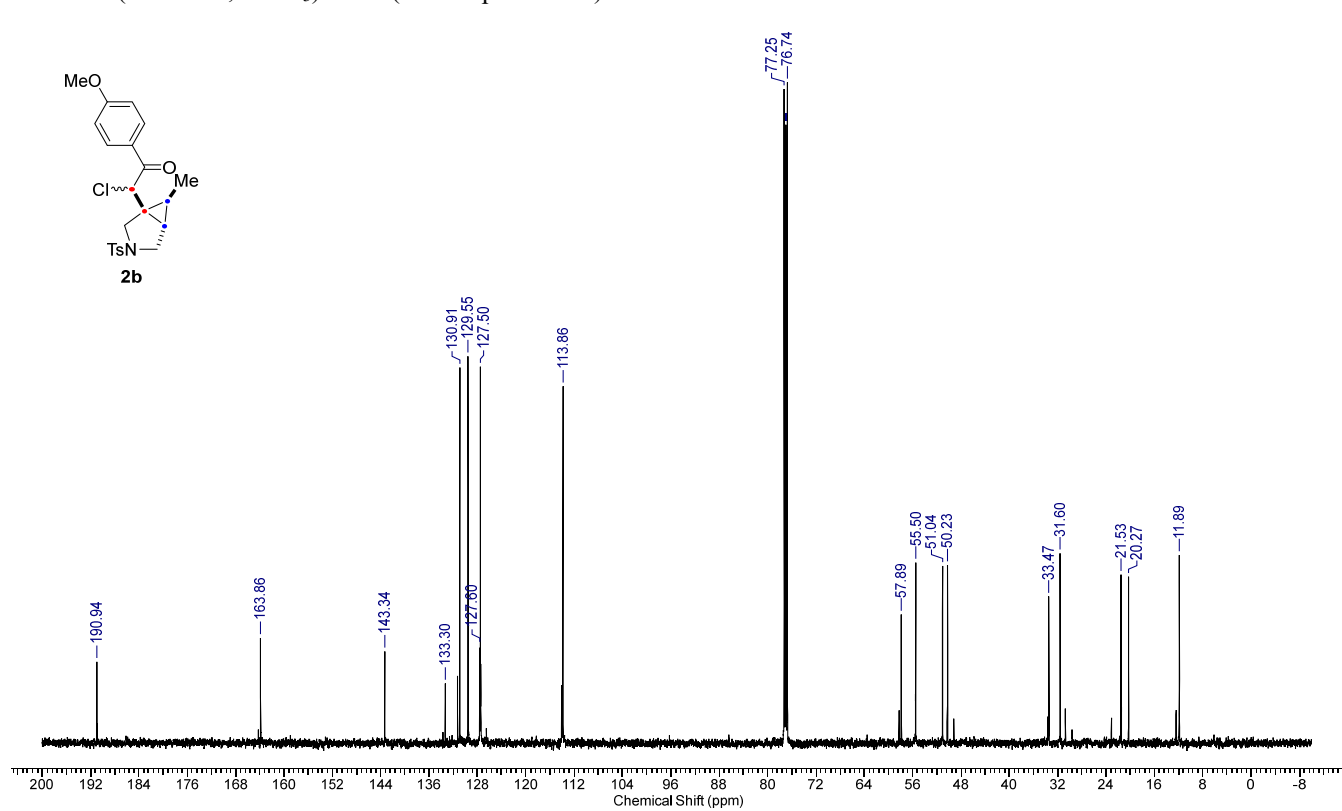

$^1\text{H}$  NMR (500 MHz,  $\text{CDCl}_3$ ) of **2c** (69:31 mixture of epimers)

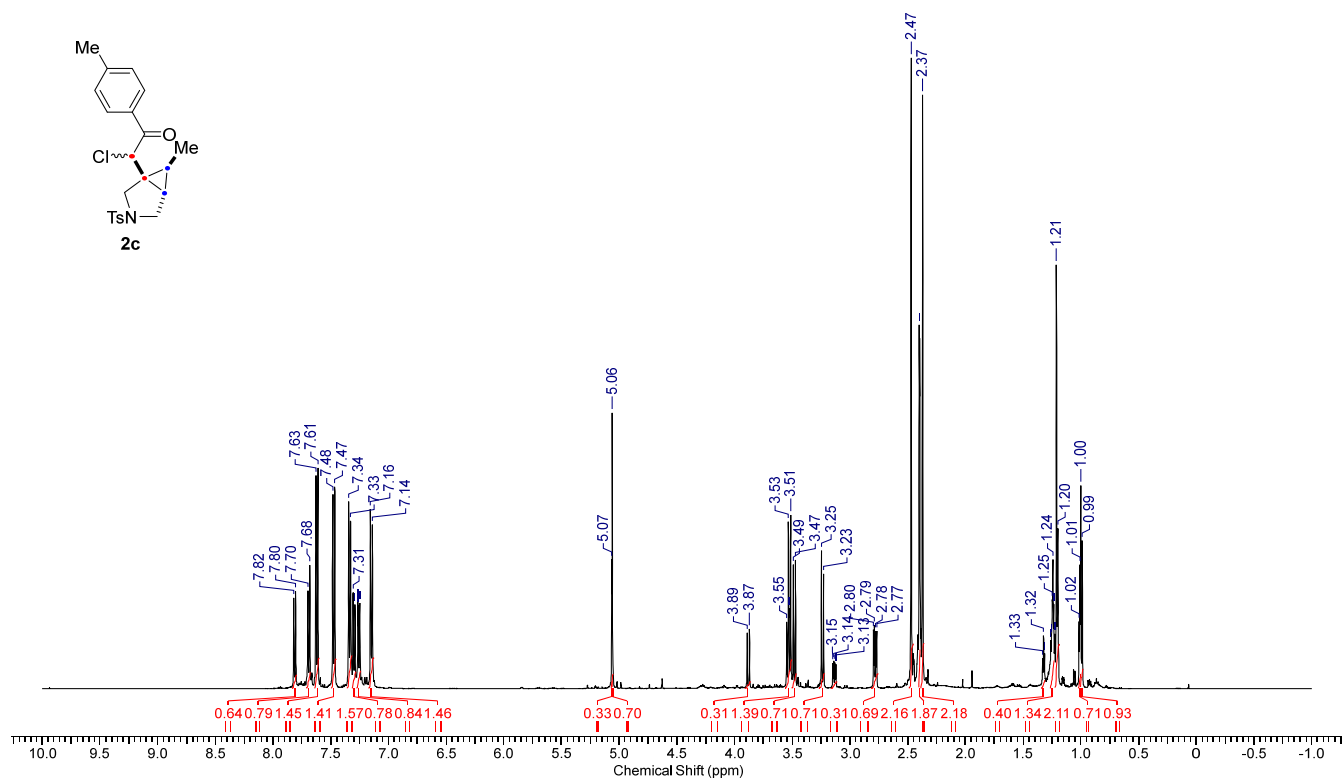

$^{13}\text{C}$  NMR (125 MHz,  $\text{CDCl}_3$ ) of **2c** (69:31 mixture of epimers)

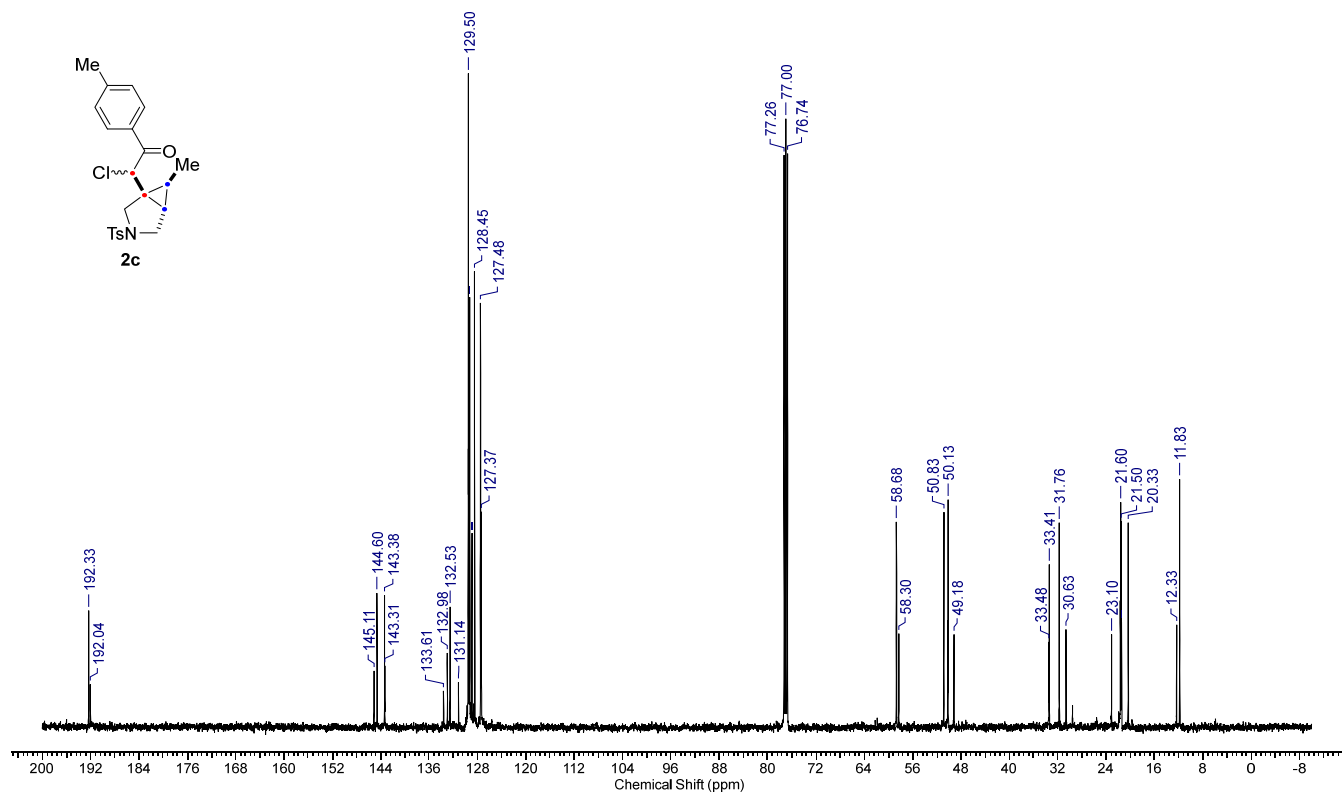

$^1\text{H}$  NMR (500 MHz,  $\text{CDCl}_3$ ) of **2d** (71:29 mixture of epimers)

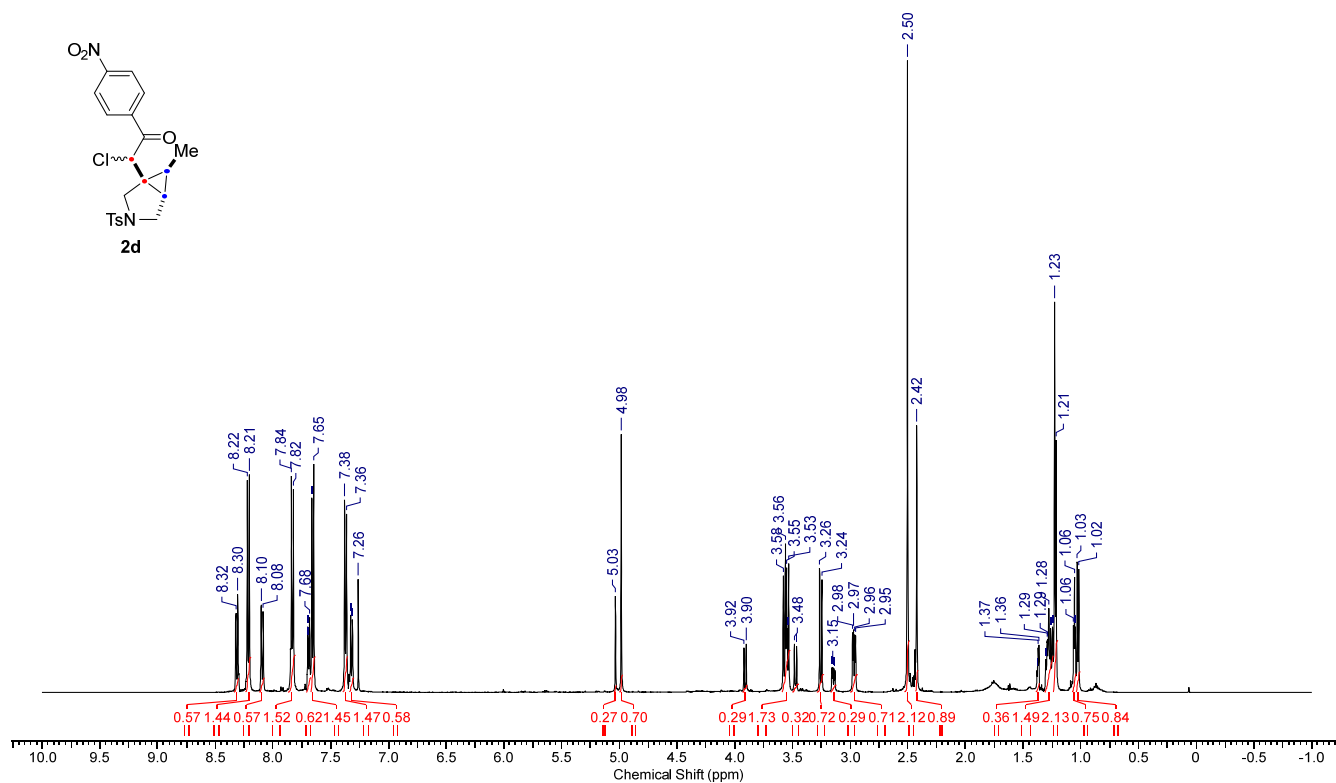

$^{13}\text{C}$  NMR (125 MHz,  $\text{CDCl}_3$ ) of **2d** (71:29 mixture of epimers)

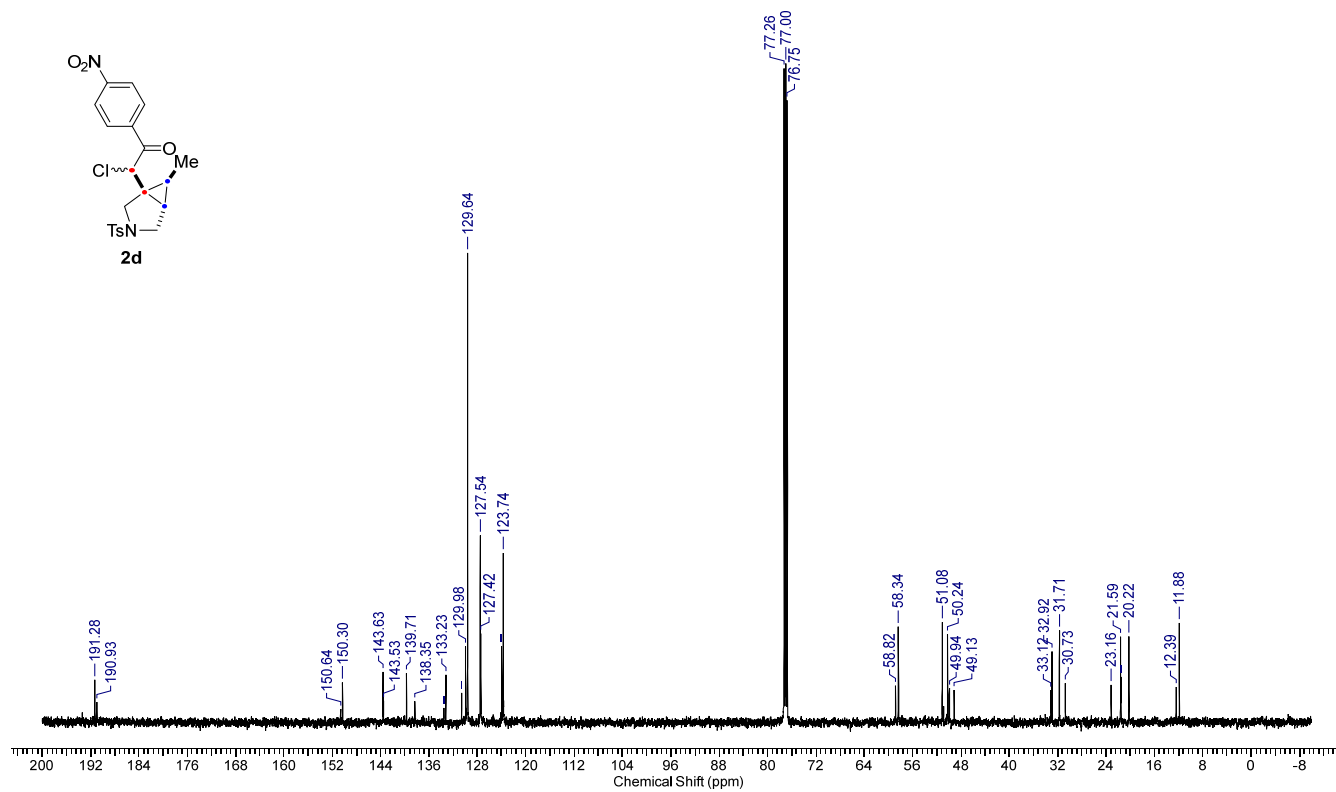



$^1\text{H}$  NMR (500 MHz,  $\text{CDCl}_3$ ) of **2e** (major epimer-rich)

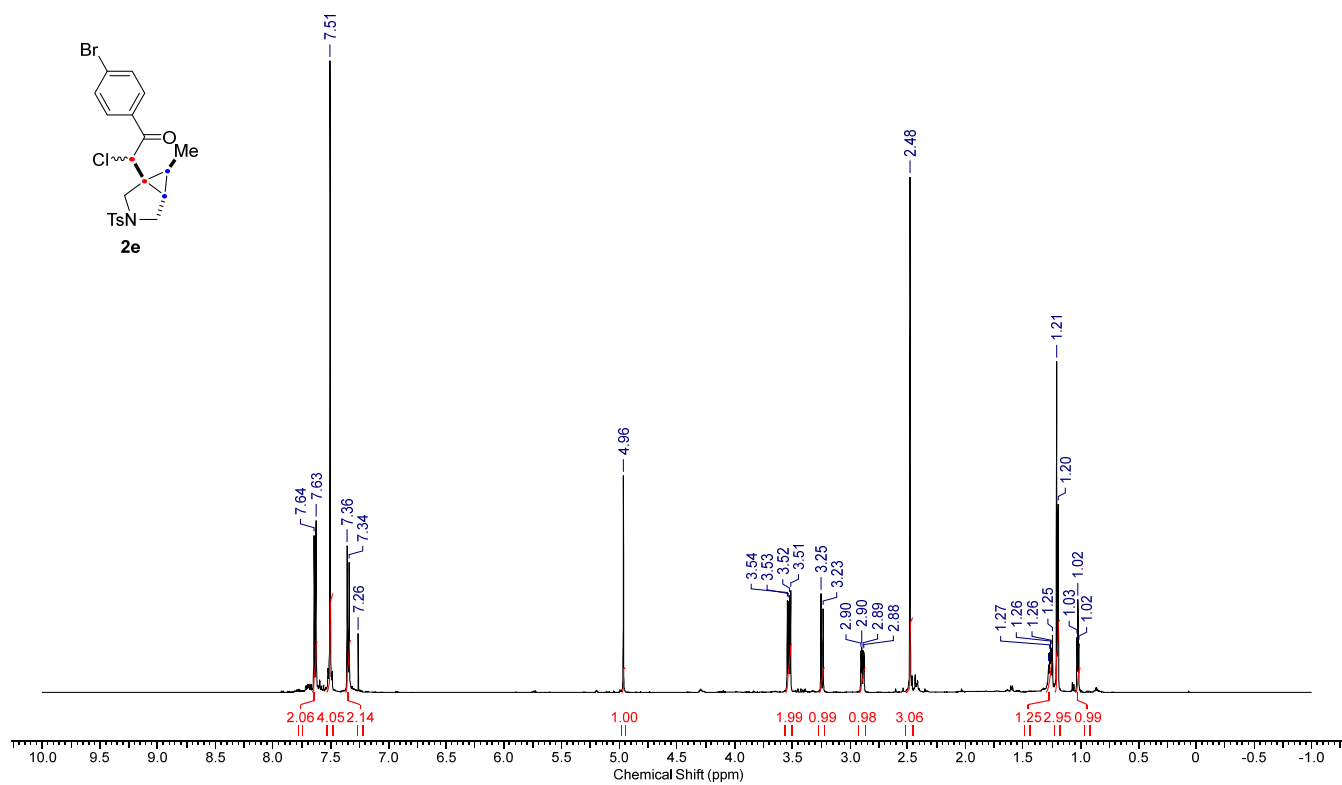

$^{13}\text{C}$  NMR (125 MHz,  $\text{CDCl}_3$ ) of **2e** (major epimer-rich)

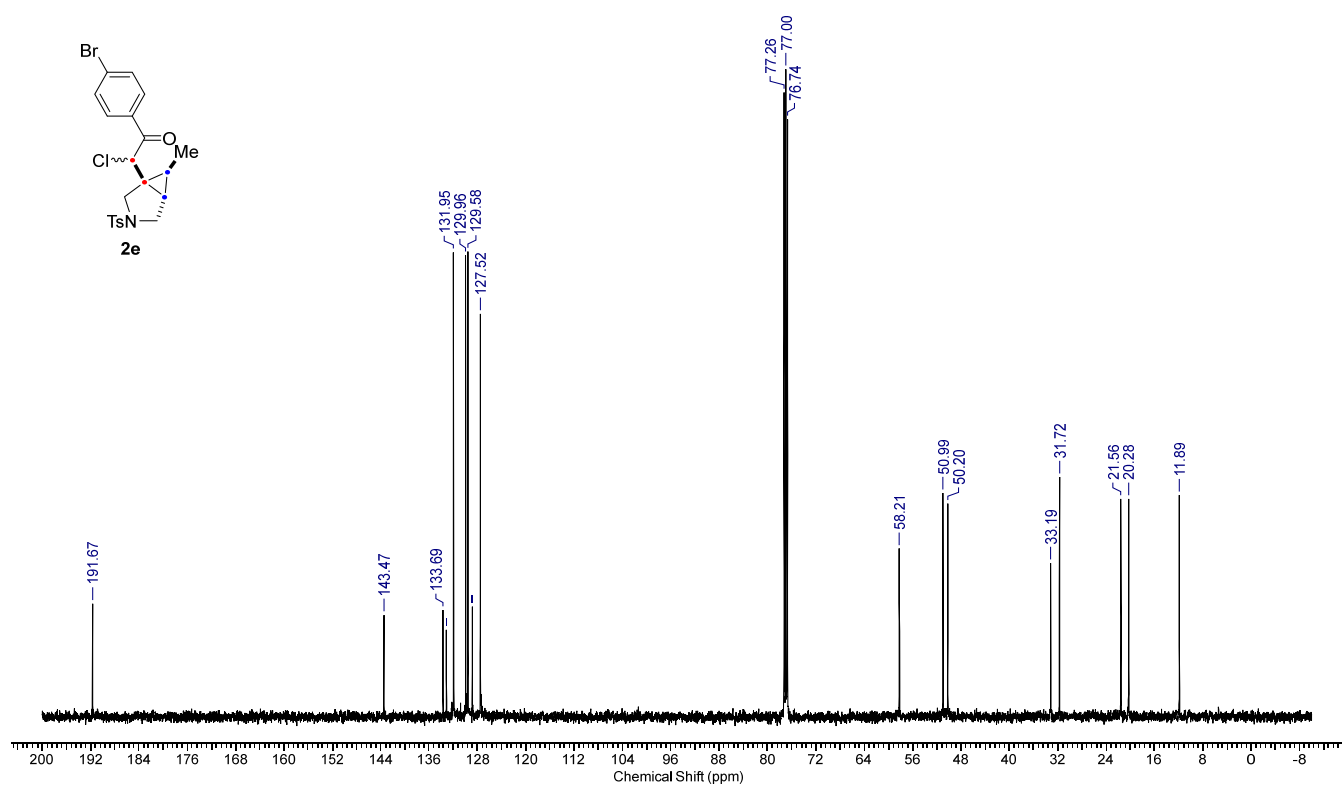

$^1\text{H}$  NMR (500 MHz,  $\text{CDCl}_3$ ) of **2e** (minor epimer-rich)

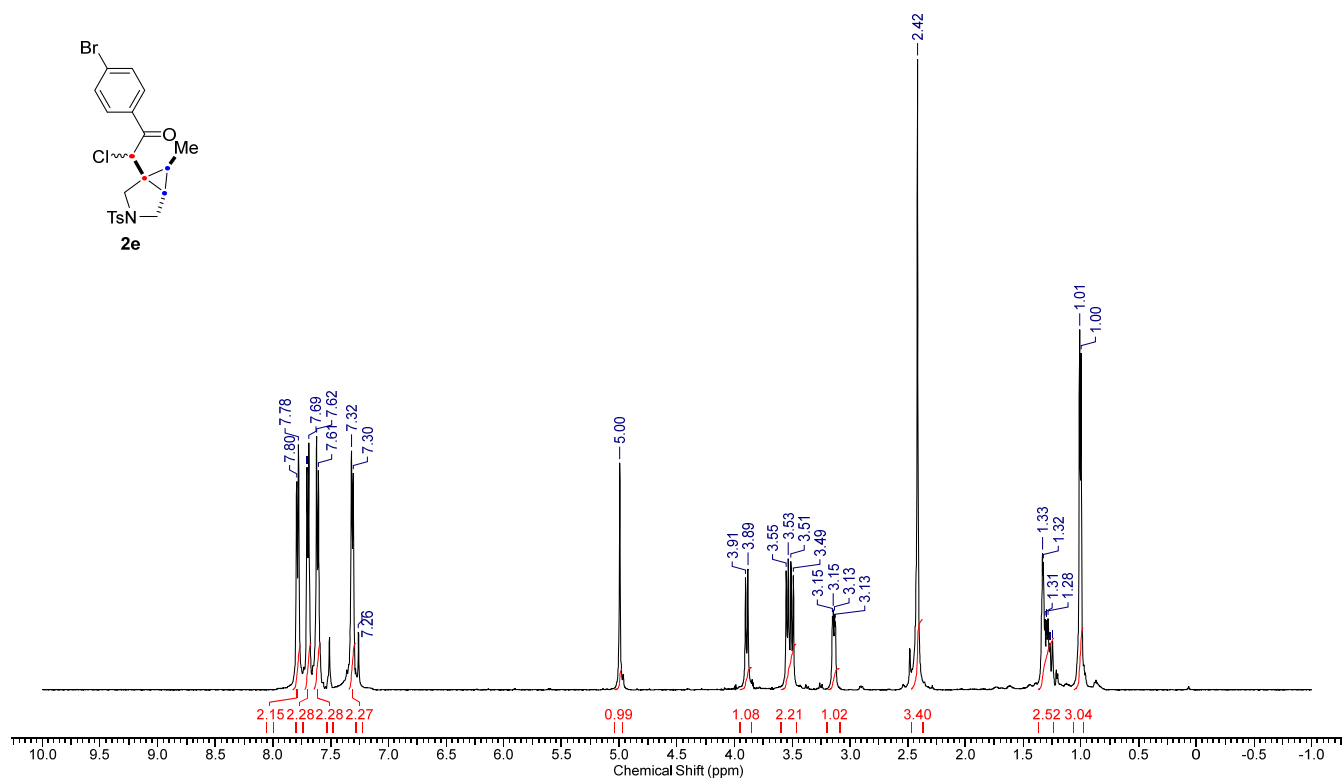

$^{13}\text{C}$  NMR (125 MHz,  $\text{CDCl}_3$ ) of **2e** (minor epimer-rich)

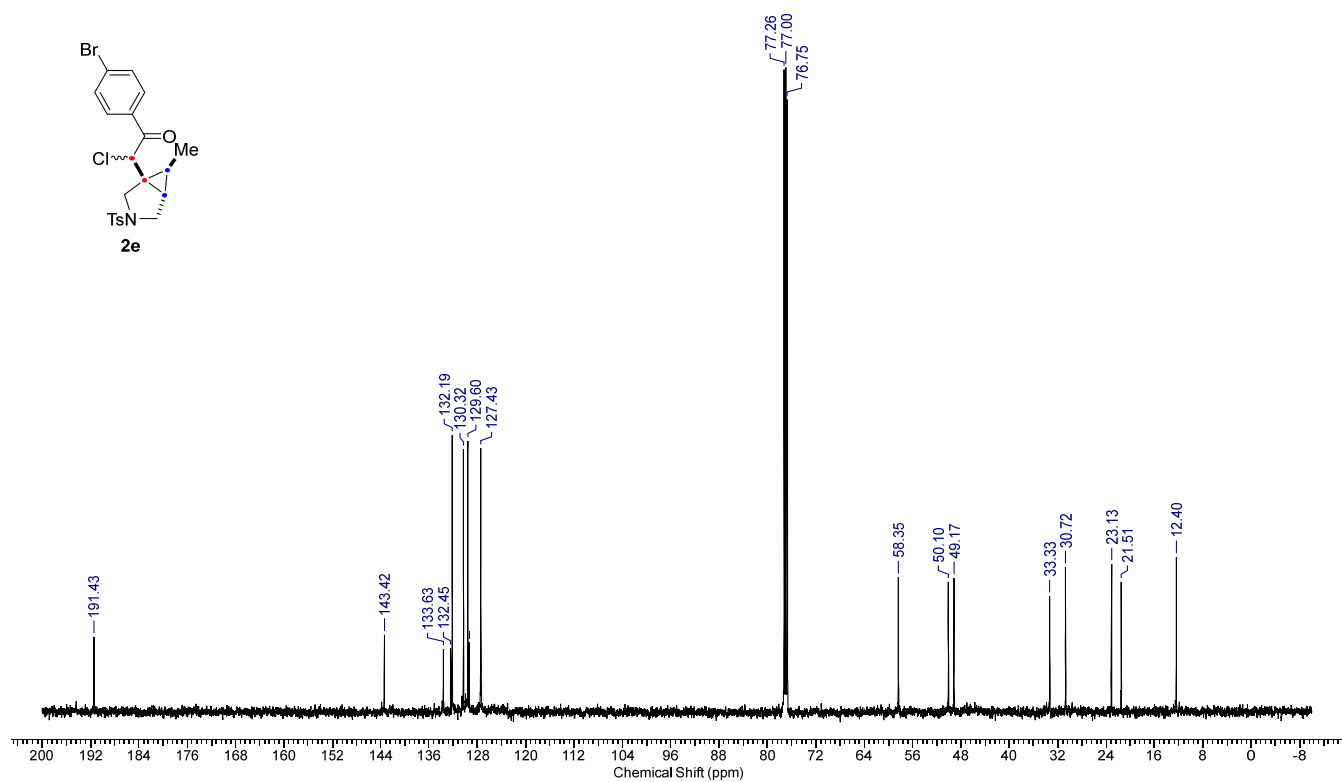

$^1\text{H}$  NMR (500 MHz,  $\text{CDCl}_3$ ) of **2f** (61:39 mixture of epimers)

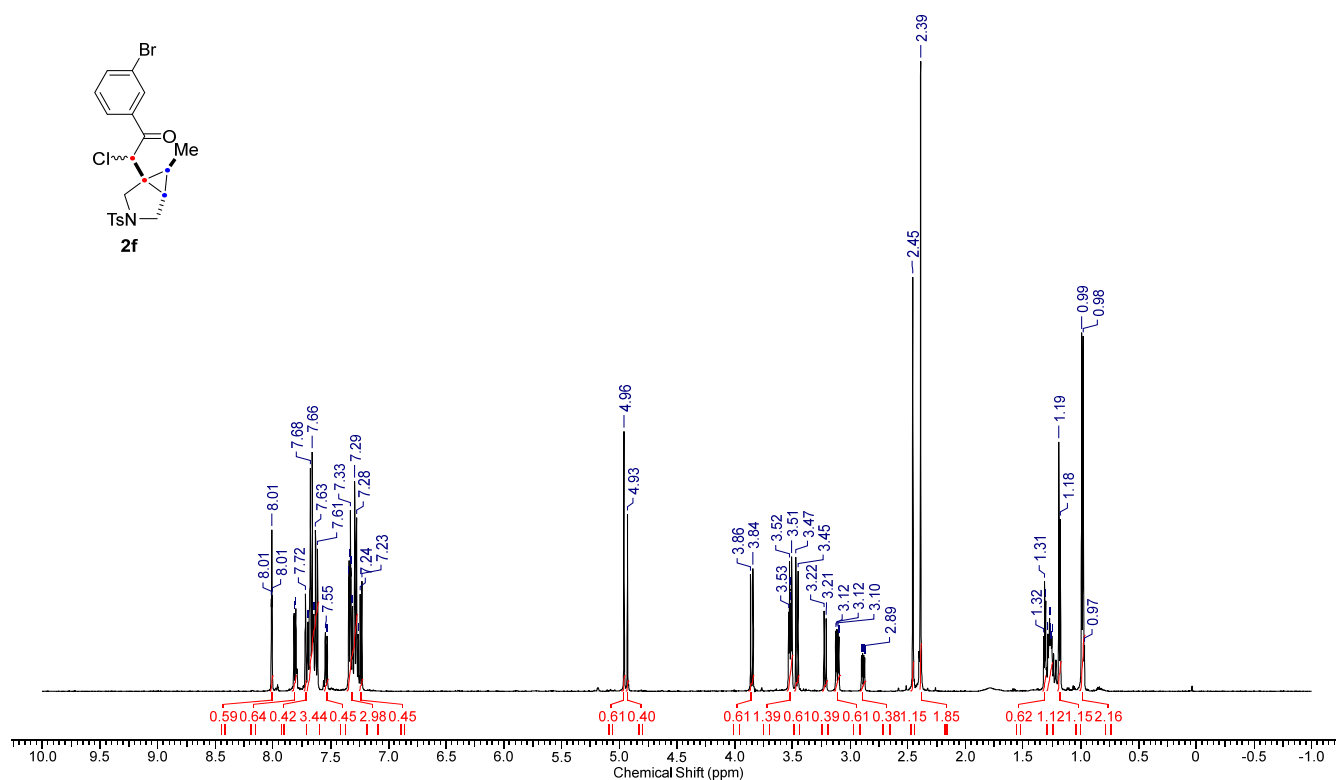

$^{13}\text{C}$  NMR (125 MHz,  $\text{CDCl}_3$ ) of **2f** (61:39 mixture of epimers)

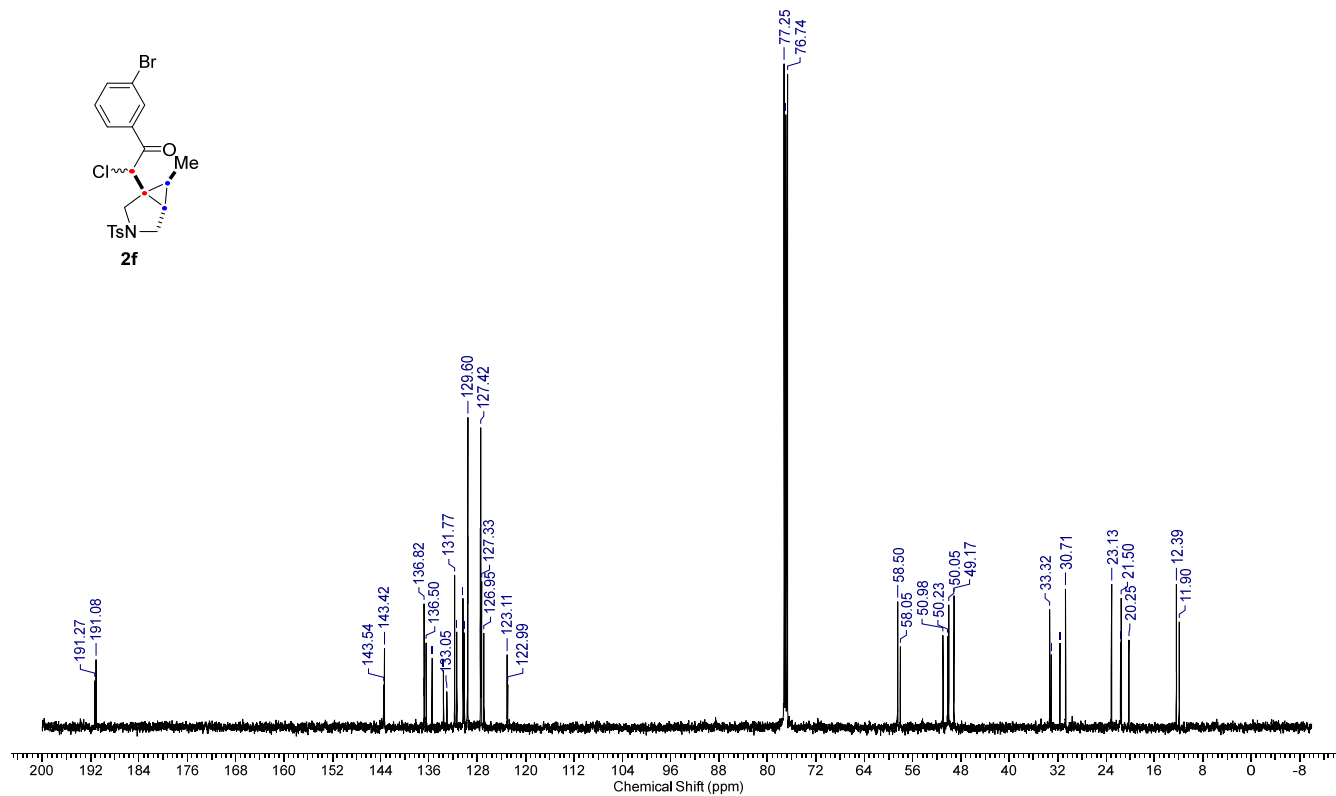

$^1\text{H}$  NMR (500 MHz,  $\text{CDCl}_3$ ) of **2g** (major epimer)

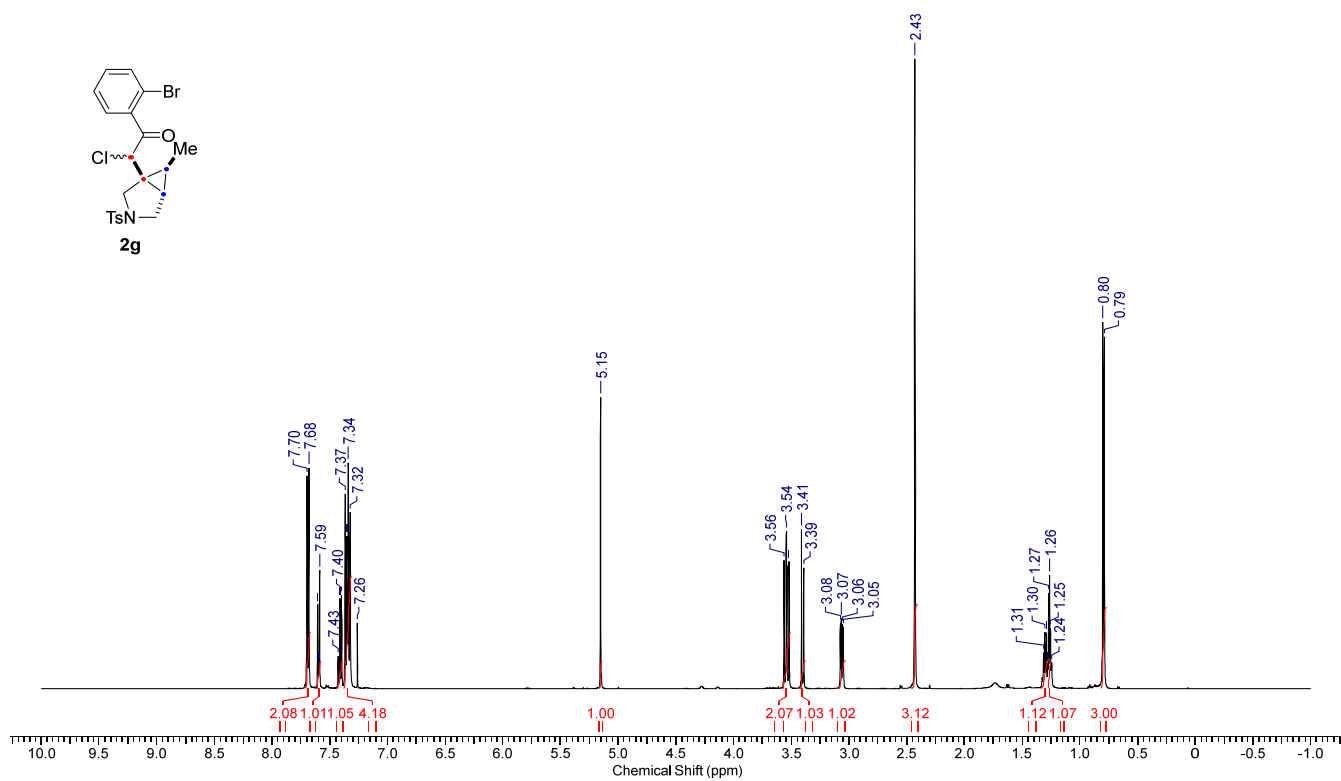

$^{13}\text{C}$  NMR (125 MHz,  $\text{CDCl}_3$ ) of **2g** (major epimer)

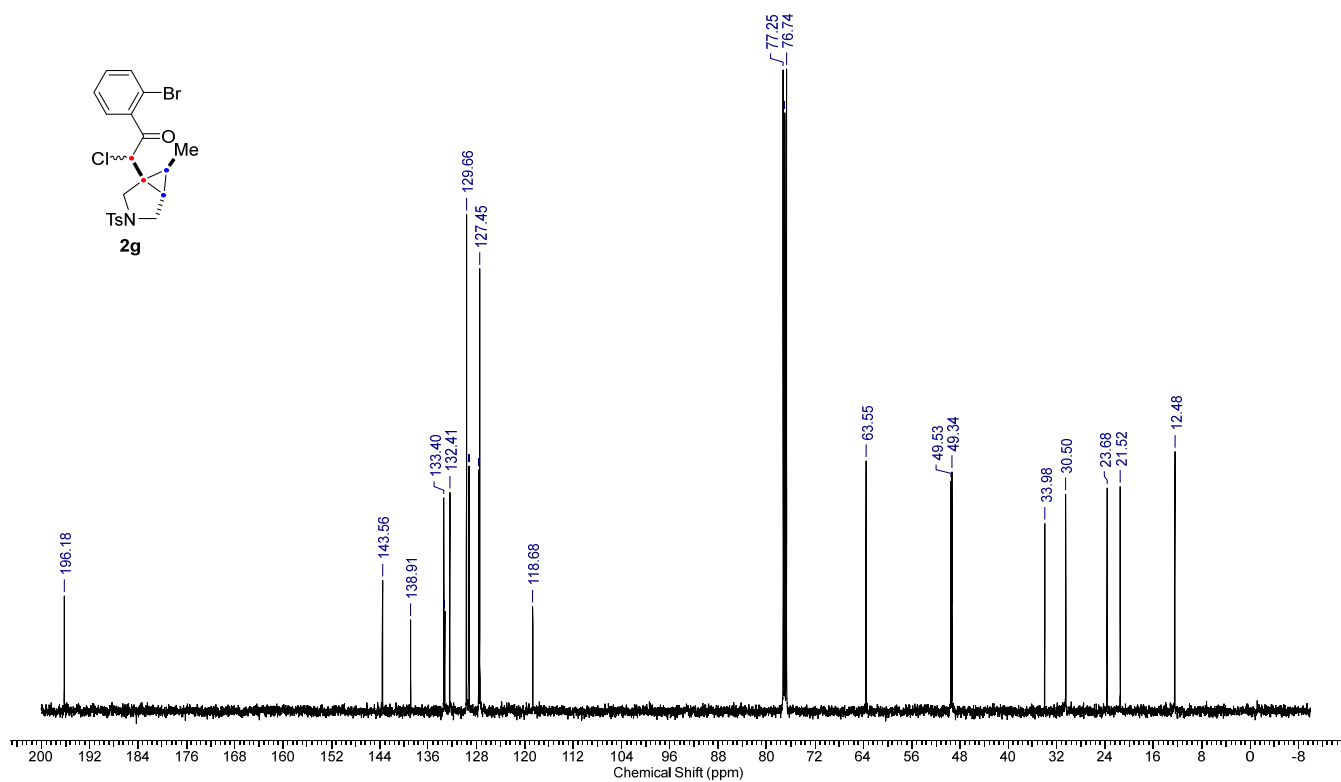

$^1\text{H}$  NMR (500 MHz,  $\text{CDCl}_3$ ) of **2g** (minor epimer)

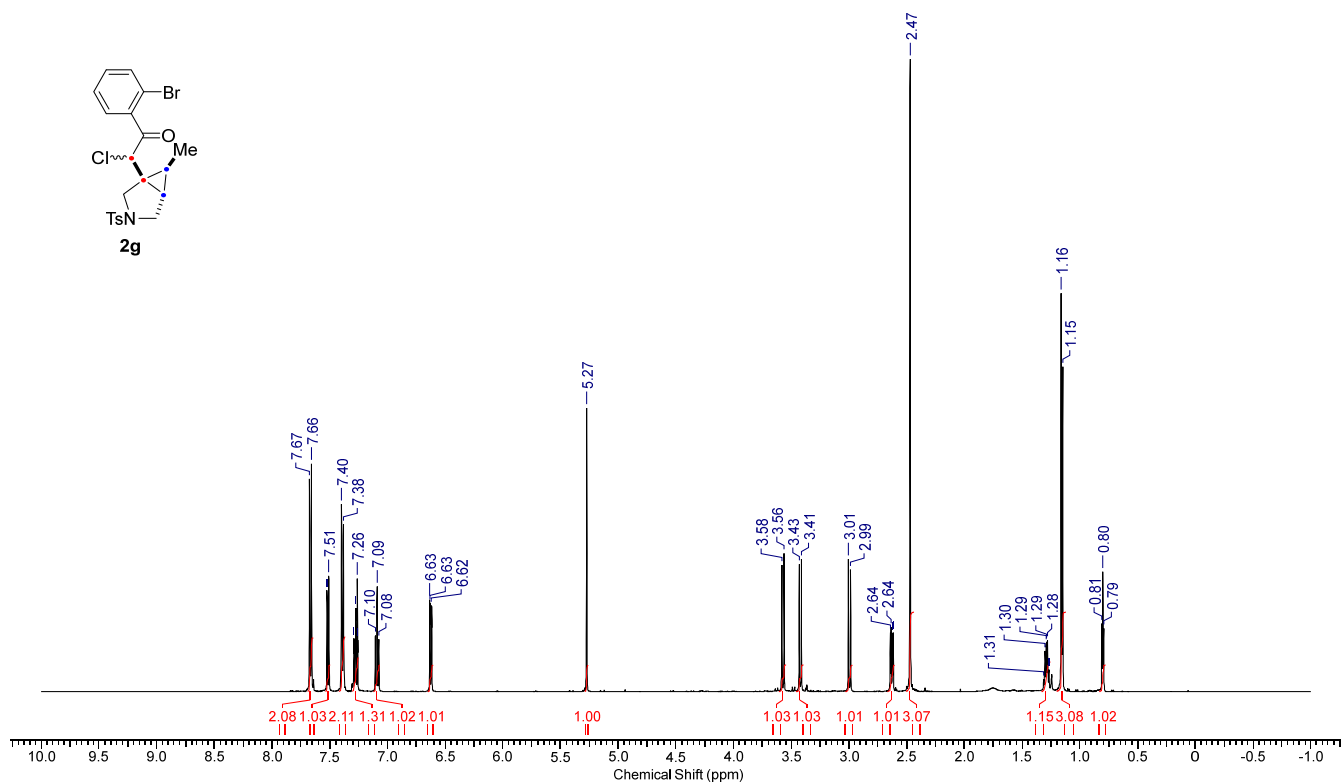

$^{13}\text{C}$  NMR (125 MHz,  $\text{CDCl}_3$ ) of **2g** (minor epimer)

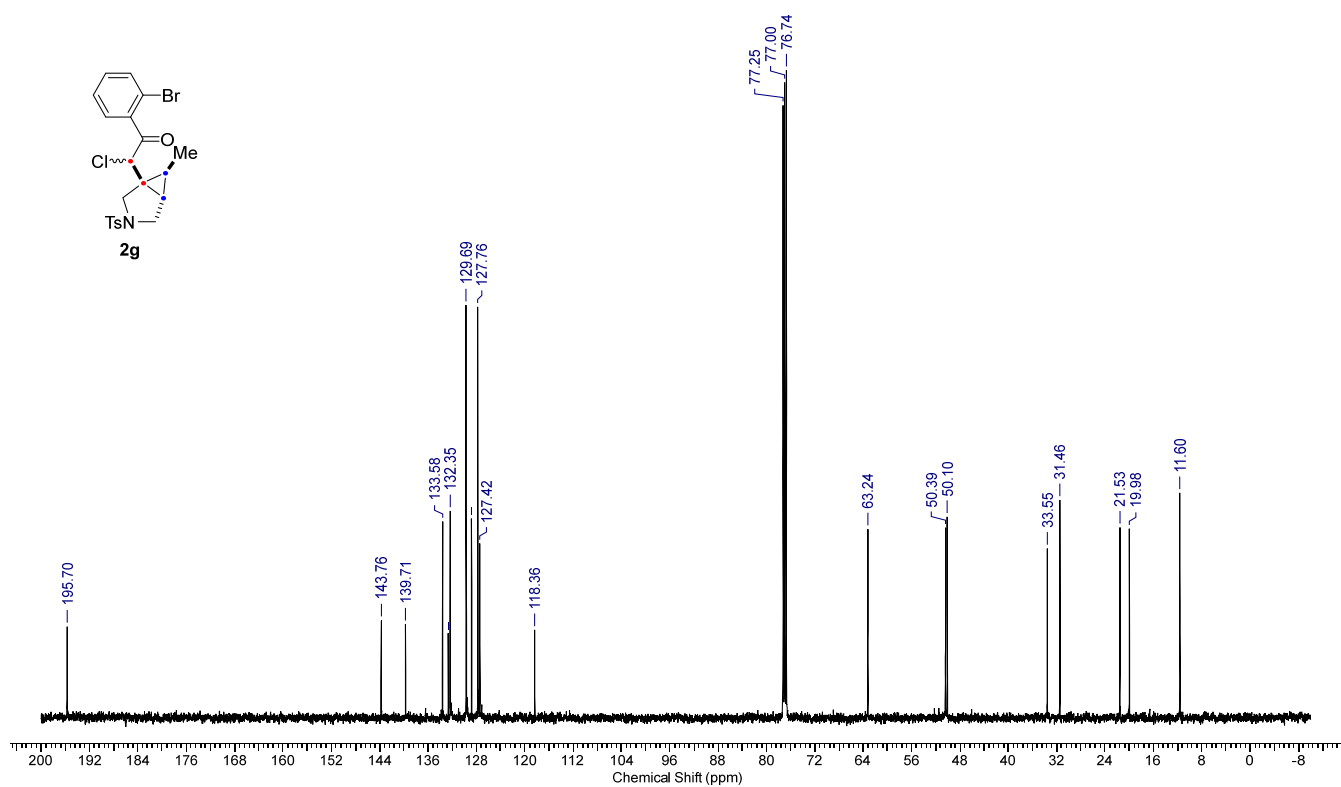

$^1\text{H}$  NMR (500 MHz,  $\text{CDCl}_3$ ) of **2h** (60:40 mixture of epimers)

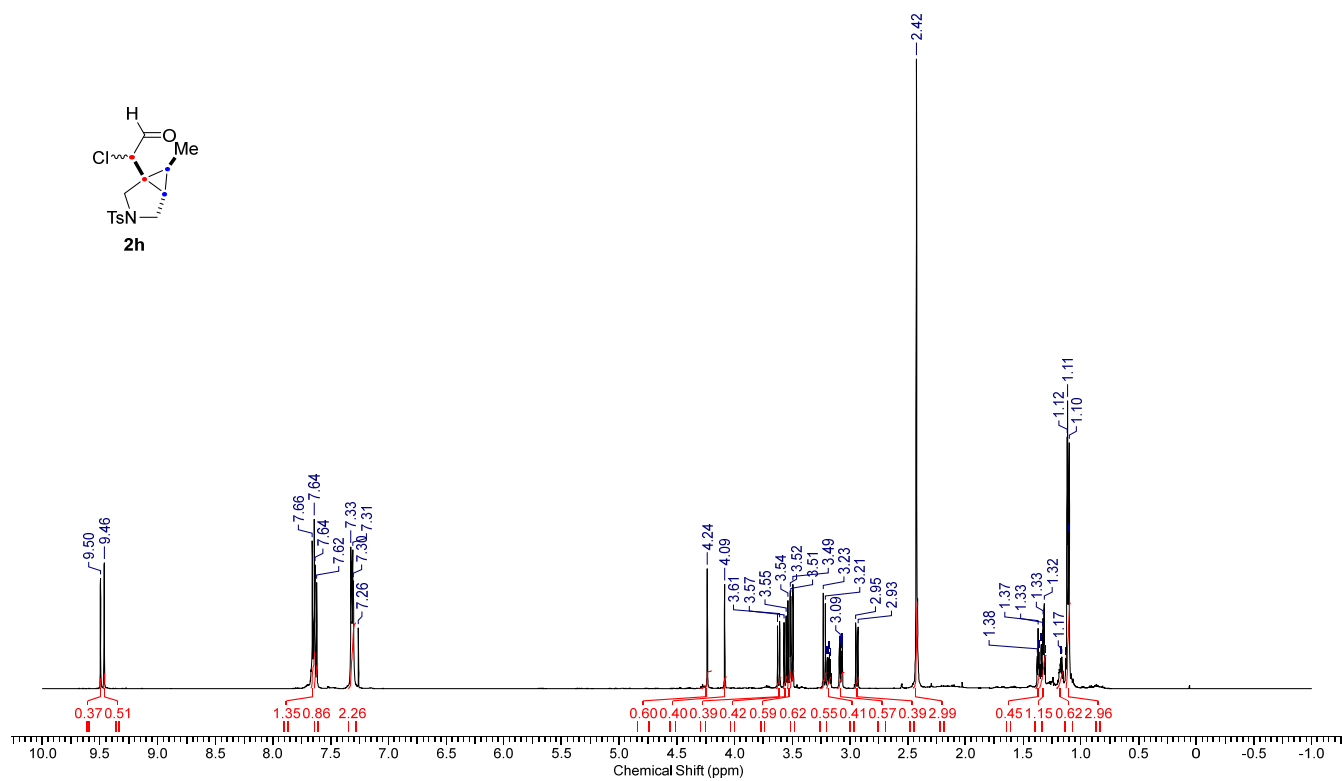

$^{13}\text{C}$  NMR (125 MHz,  $\text{CDCl}_3$ ) of **2h** (60:40 mixture of epimers)

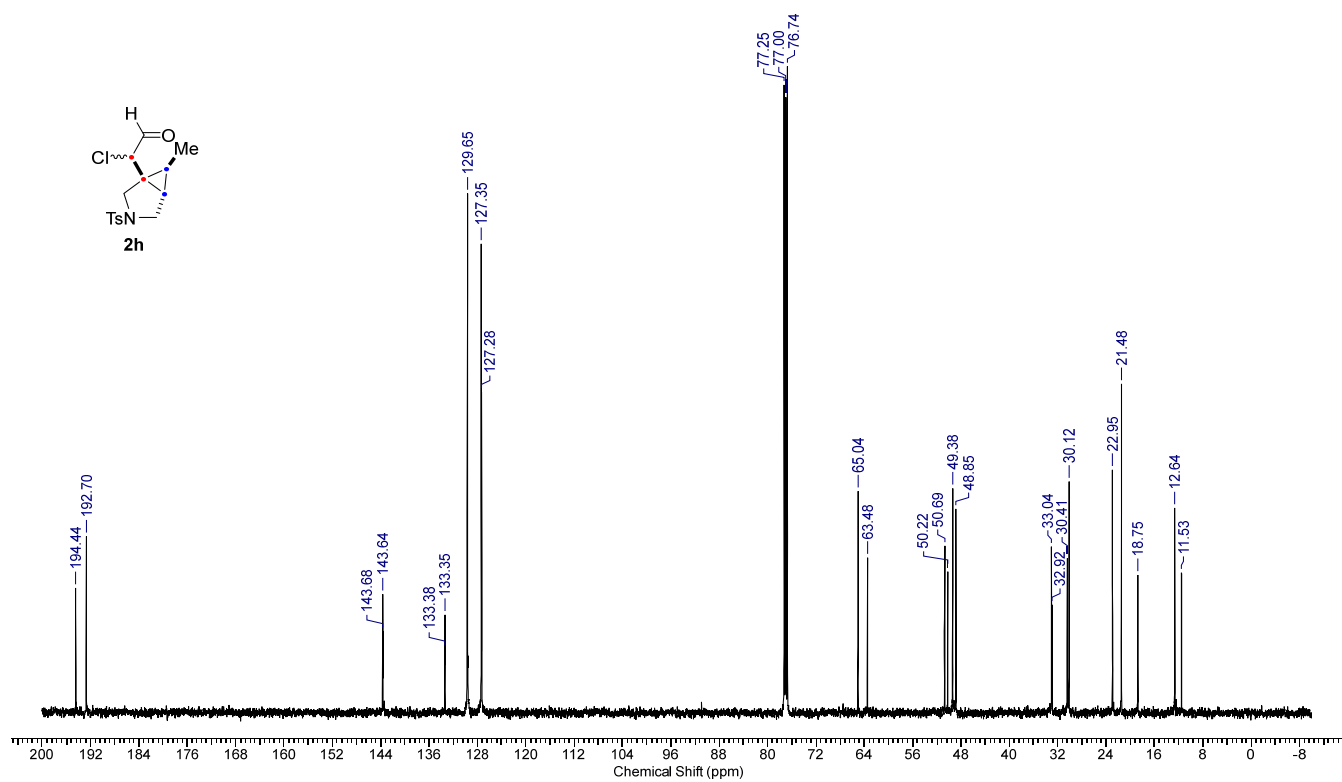

$^1\text{H}$  NMR (500 MHz,  $\text{CDCl}_3$ ) of **2i** (major epimer)

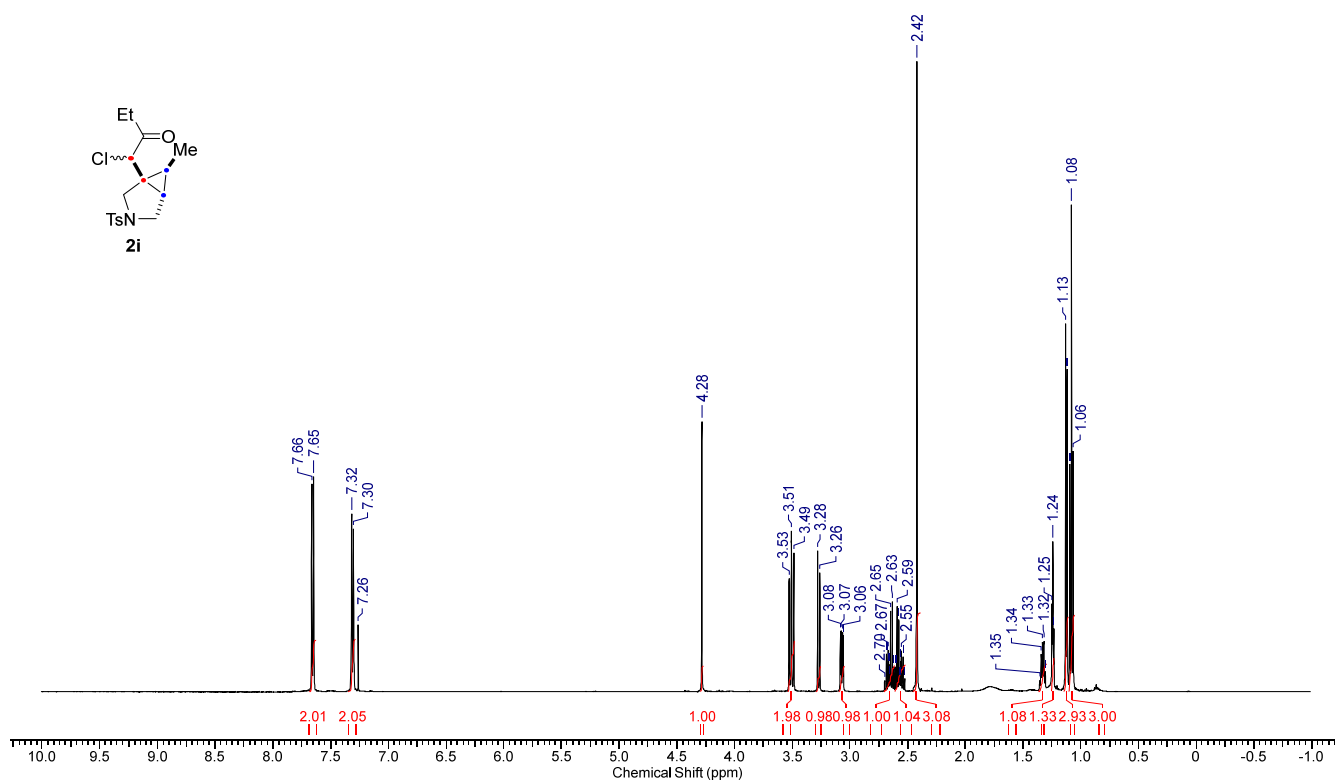

$^{13}\text{C}$  NMR (125 MHz,  $\text{CDCl}_3$ ) of **2i** (major epimer)

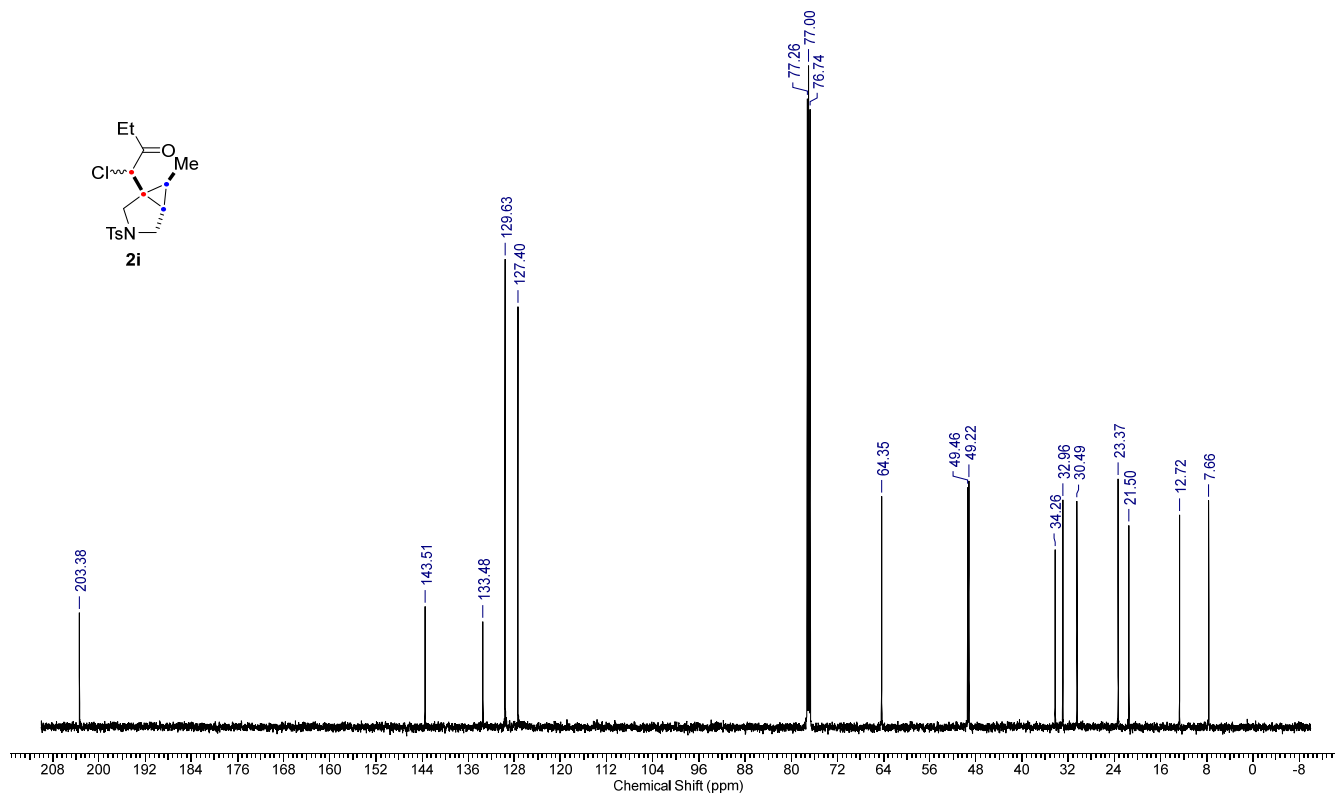

$^1\text{H}$  NMR (500 MHz,  $\text{CDCl}_3$ ) of **2i** (minor epimer)

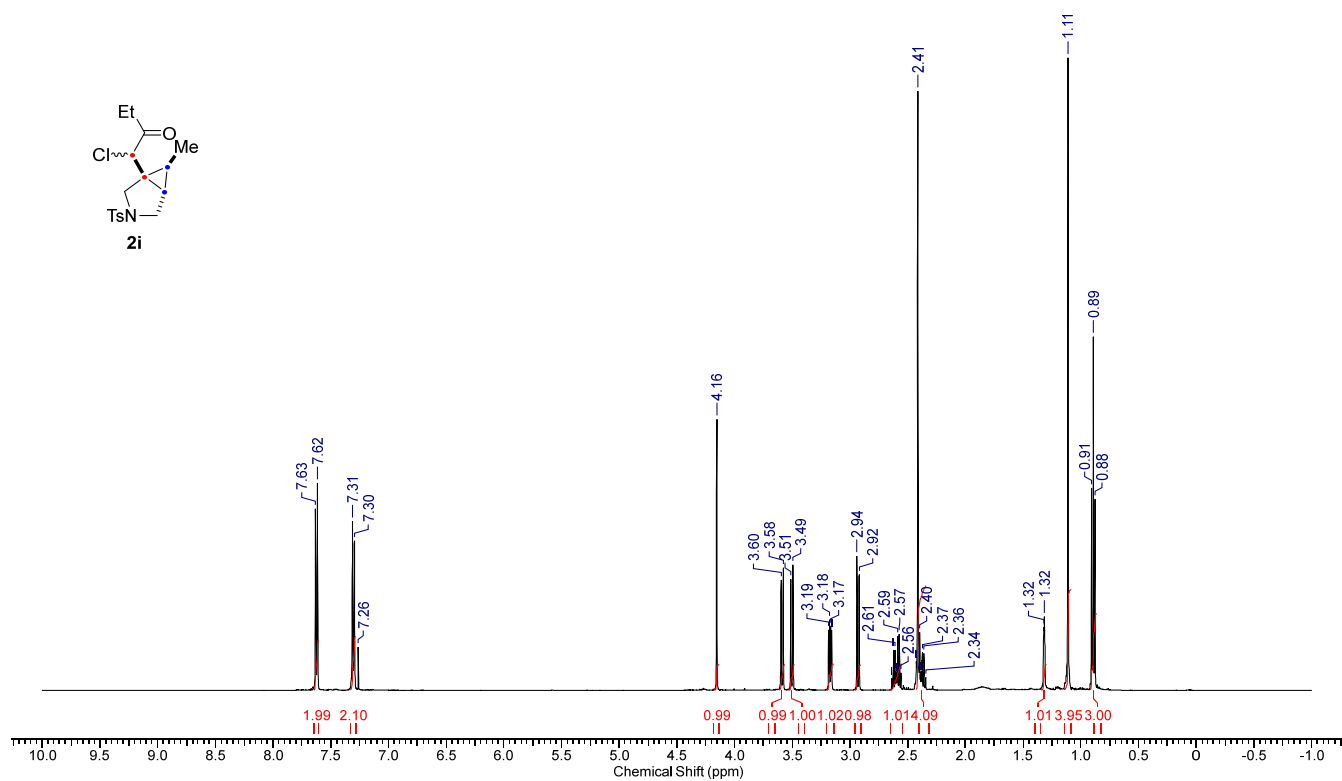

$^{13}\text{C}$  NMR (125 MHz,  $\text{CDCl}_3$ ) of **2i** (minor epimer)

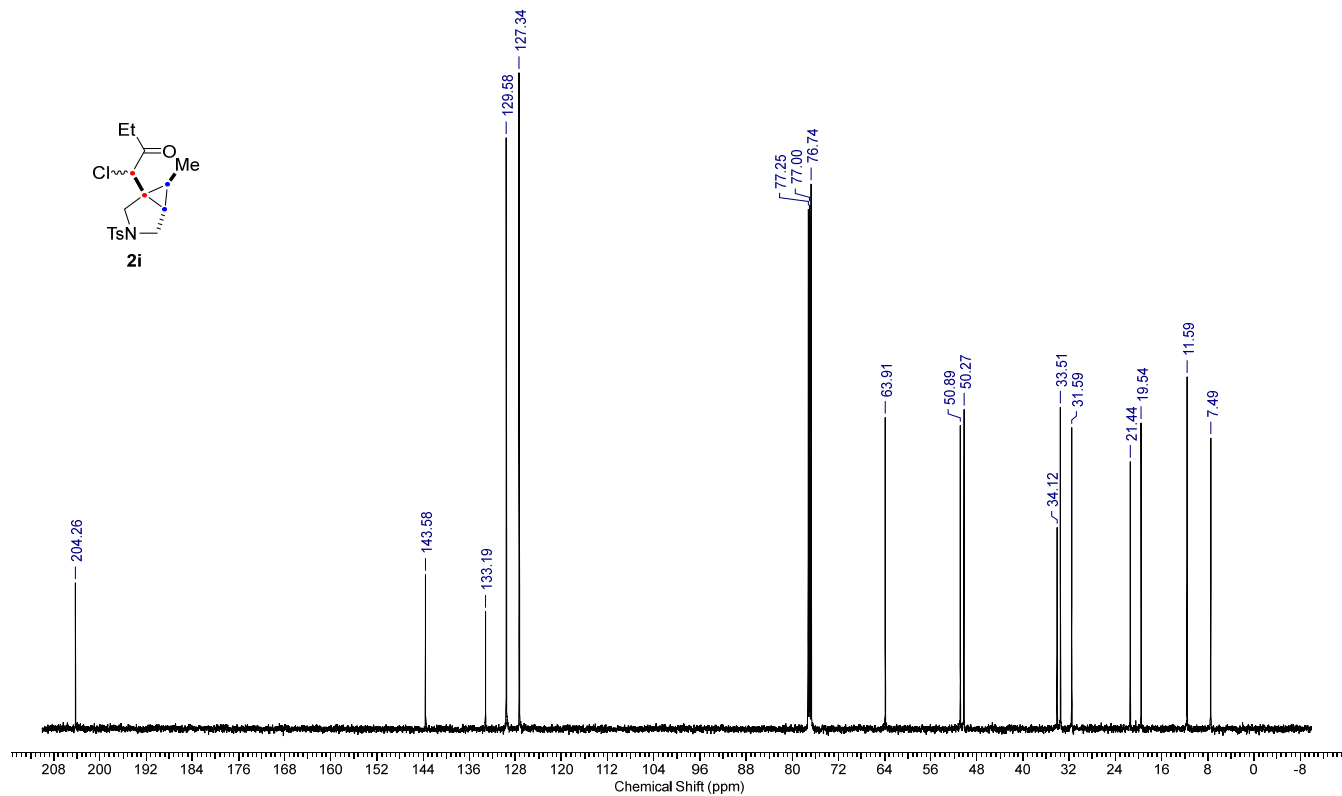



$^1\text{H}$  NMR (500 MHz,  $\text{CDCl}_3$ ) of **2j** (major epimer-rich)

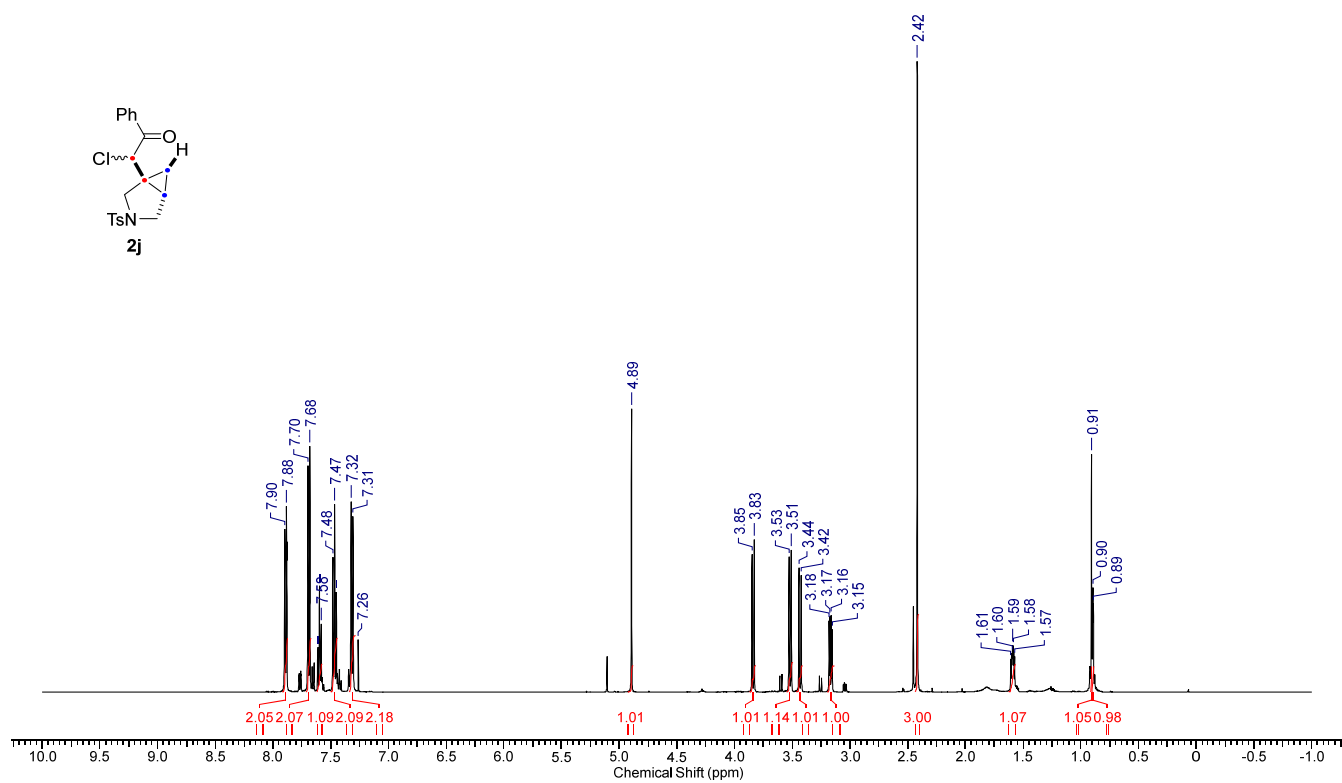

$^{13}\text{C}$  NMR (125 MHz,  $\text{CDCl}_3$ ) of **2j** (major epimer-rich)

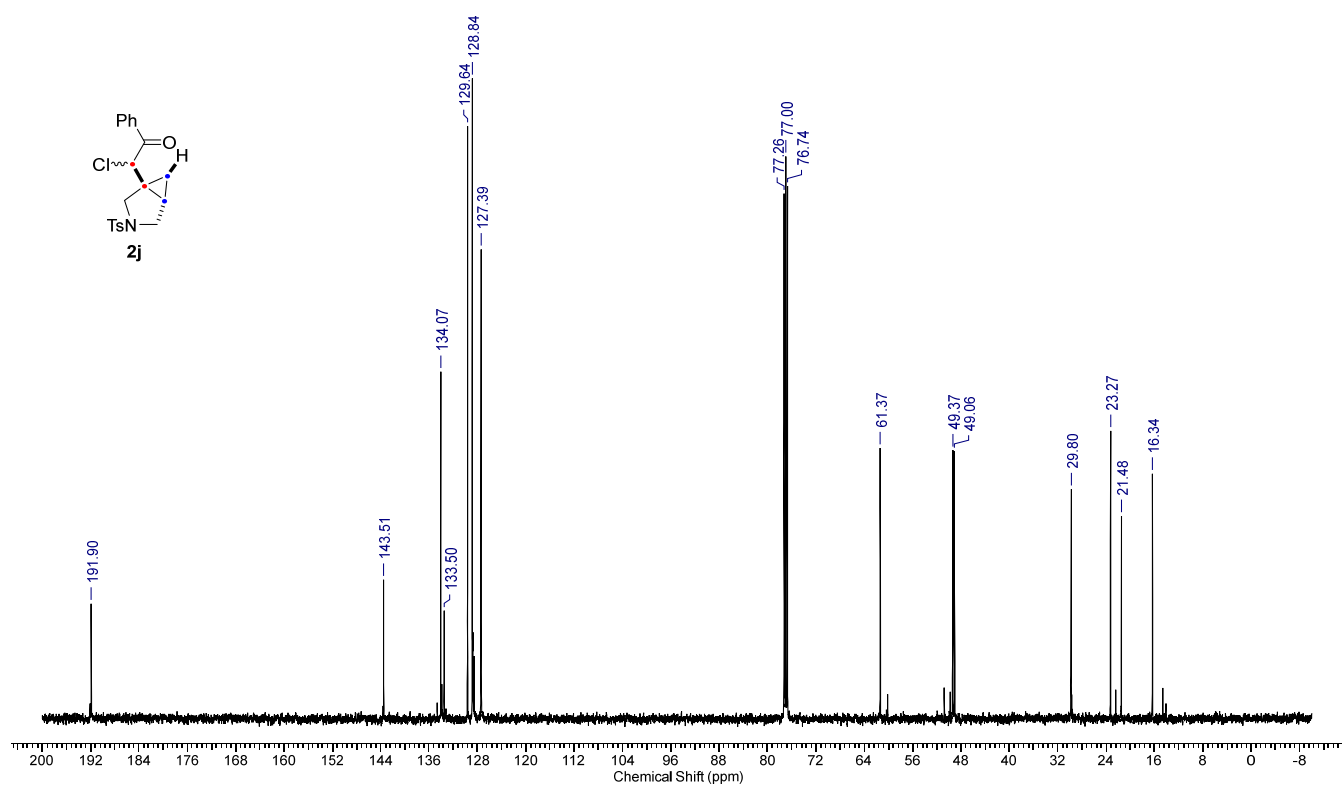

$^1\text{H}$  NMR (500 MHz,  $\text{CDCl}_3$ ) of **2j** (minor epimer)

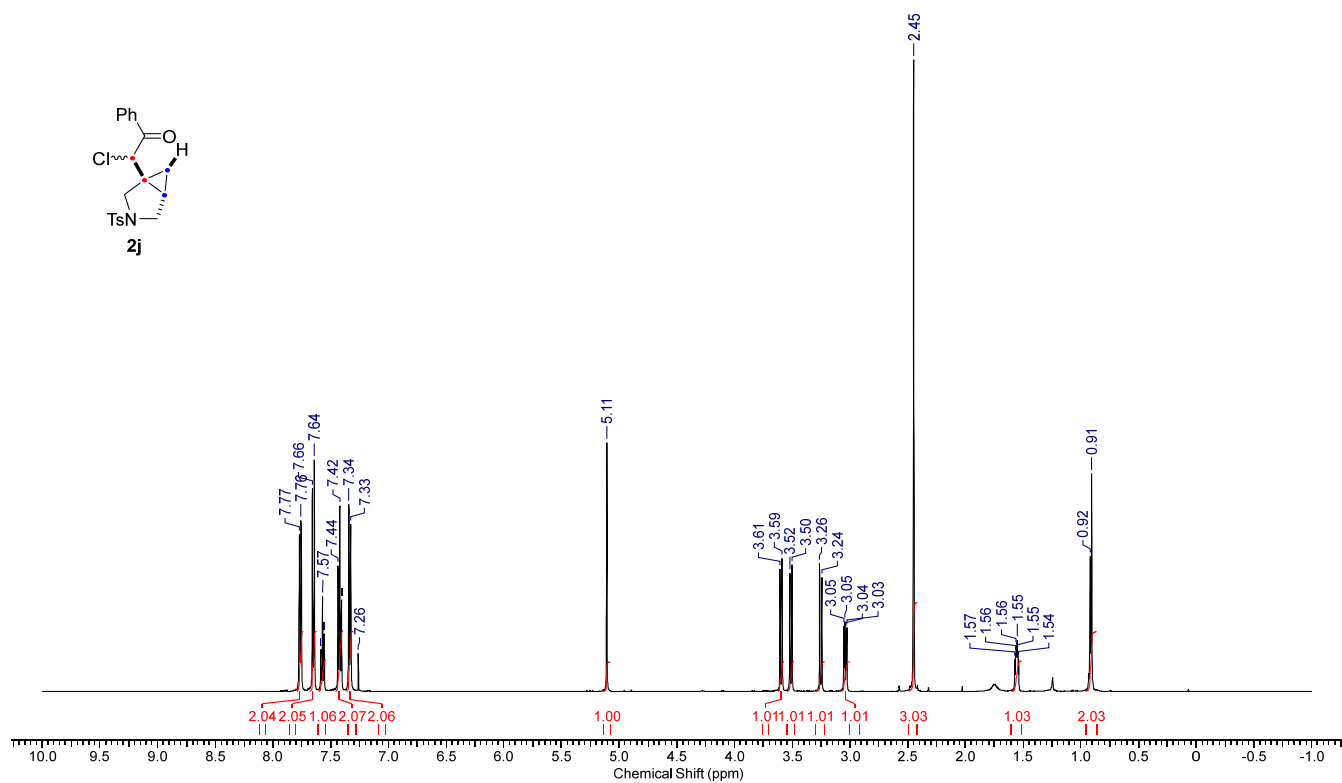

$^{13}\text{C}$  NMR (125 MHz,  $\text{CDCl}_3$ ) of **2j** (minor epimer)

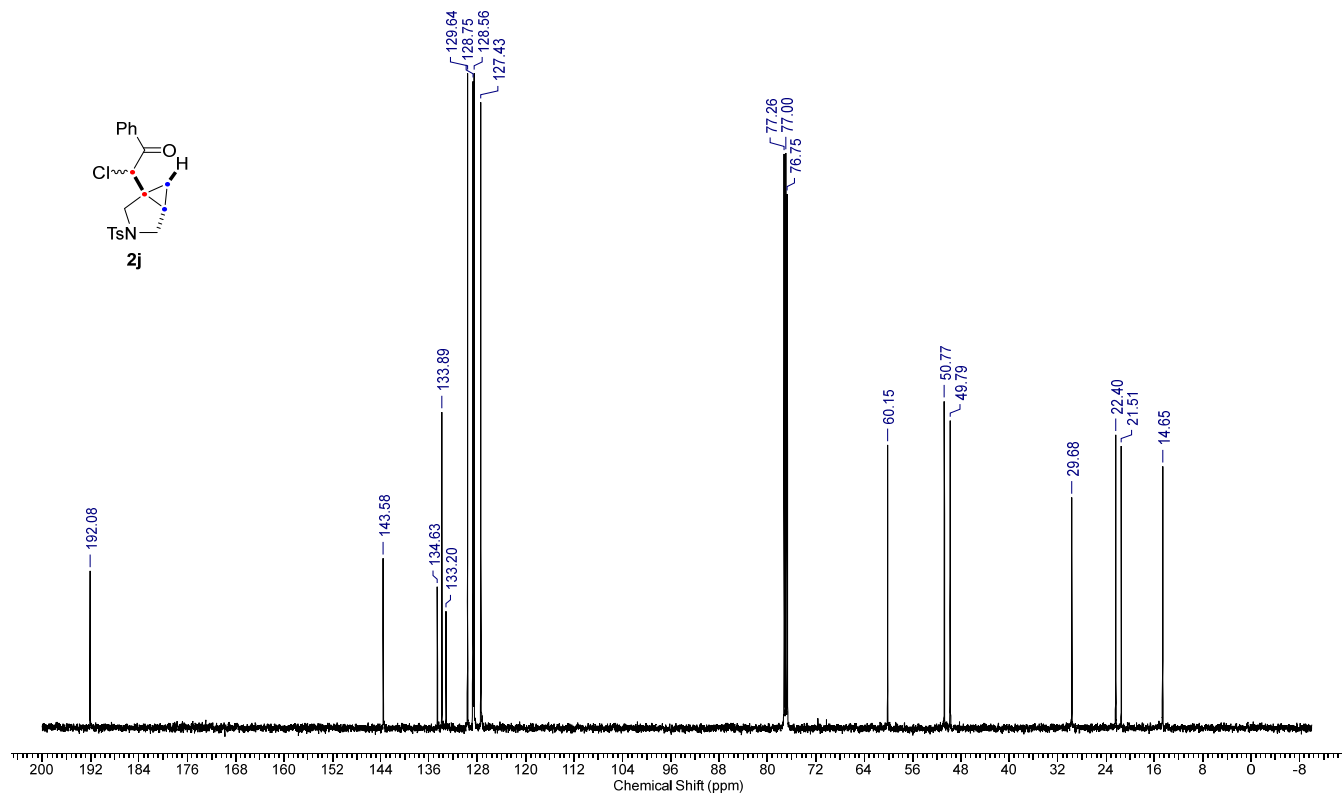

$^1\text{H}$  NMR (500 MHz,  $\text{CDCl}_3$ ) of **2k** (major epimer)

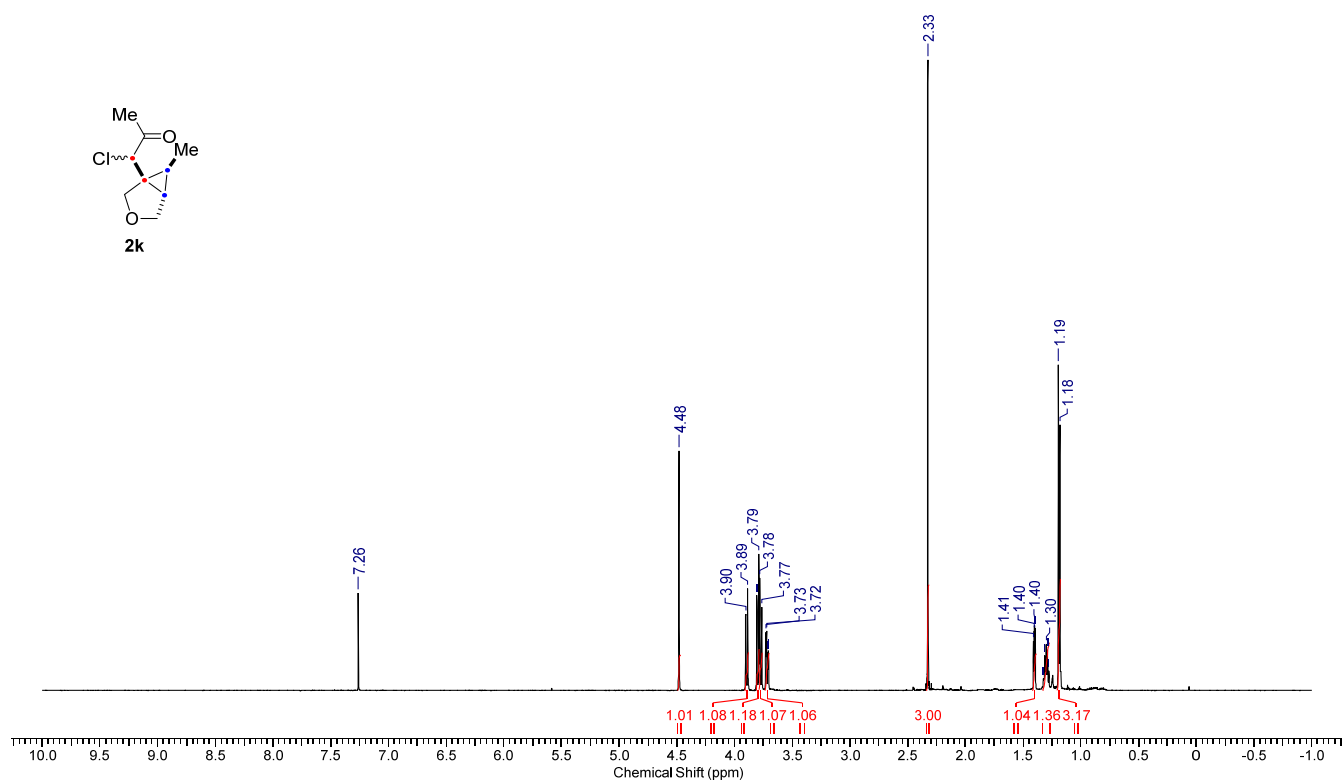

$^{13}\text{C}$  NMR (125 MHz,  $\text{CDCl}_3$ ) of **2k** (major epimer)

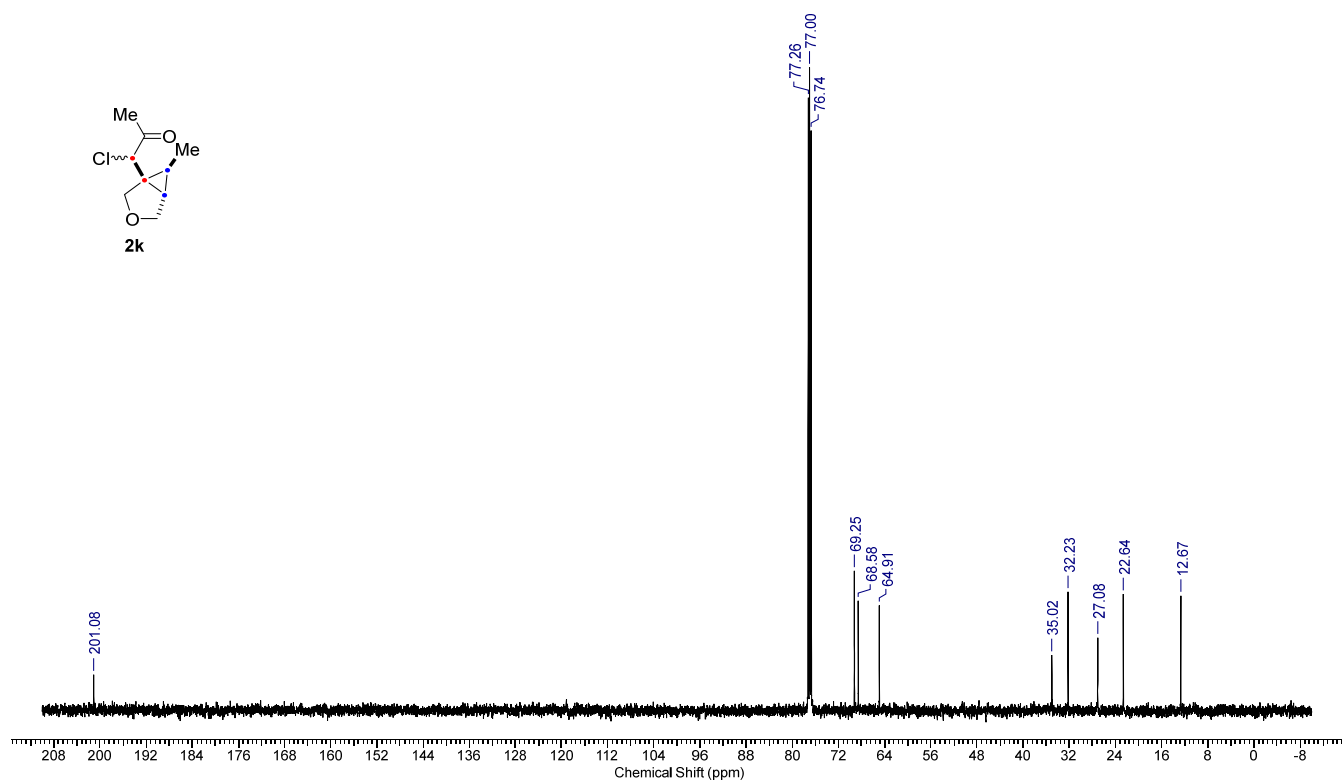

<sup>1</sup>H NMR (500 MHz, CDCl<sub>3</sub>) of **2k** (minor epimer)

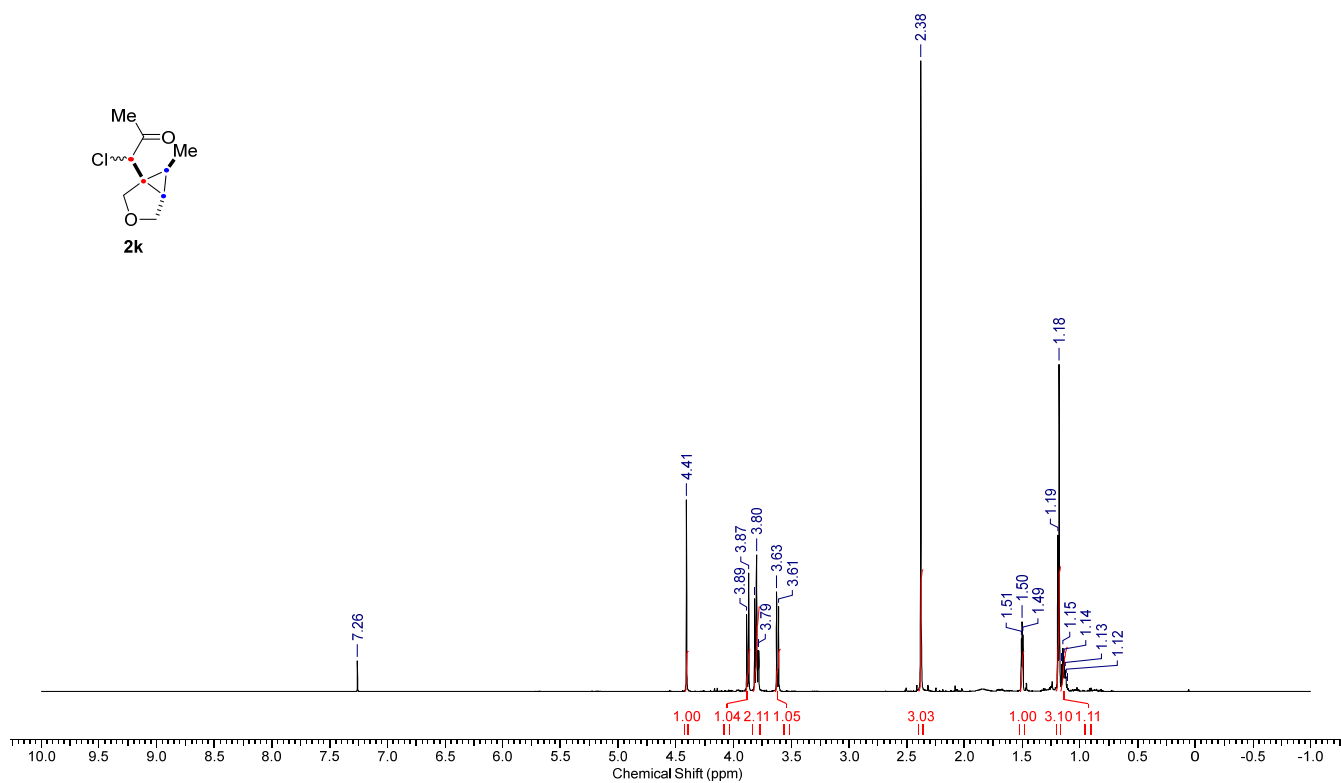

<sup>13</sup>C NMR (125 MHz, CDCl<sub>3</sub>) of **2k** (minor epimer)

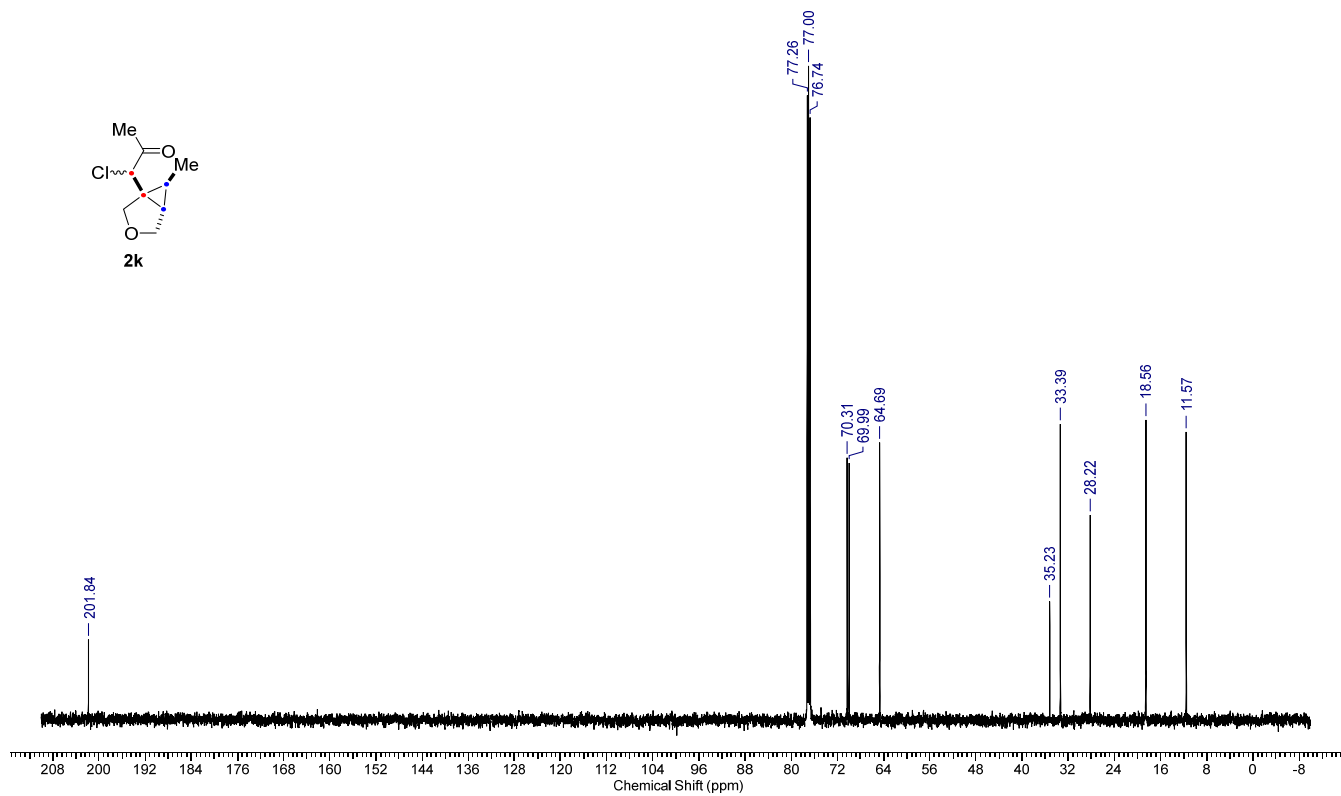

<sup>1</sup>H NMR (500 MHz, CDCl<sub>3</sub>) of **2I** (major epimer-rich)

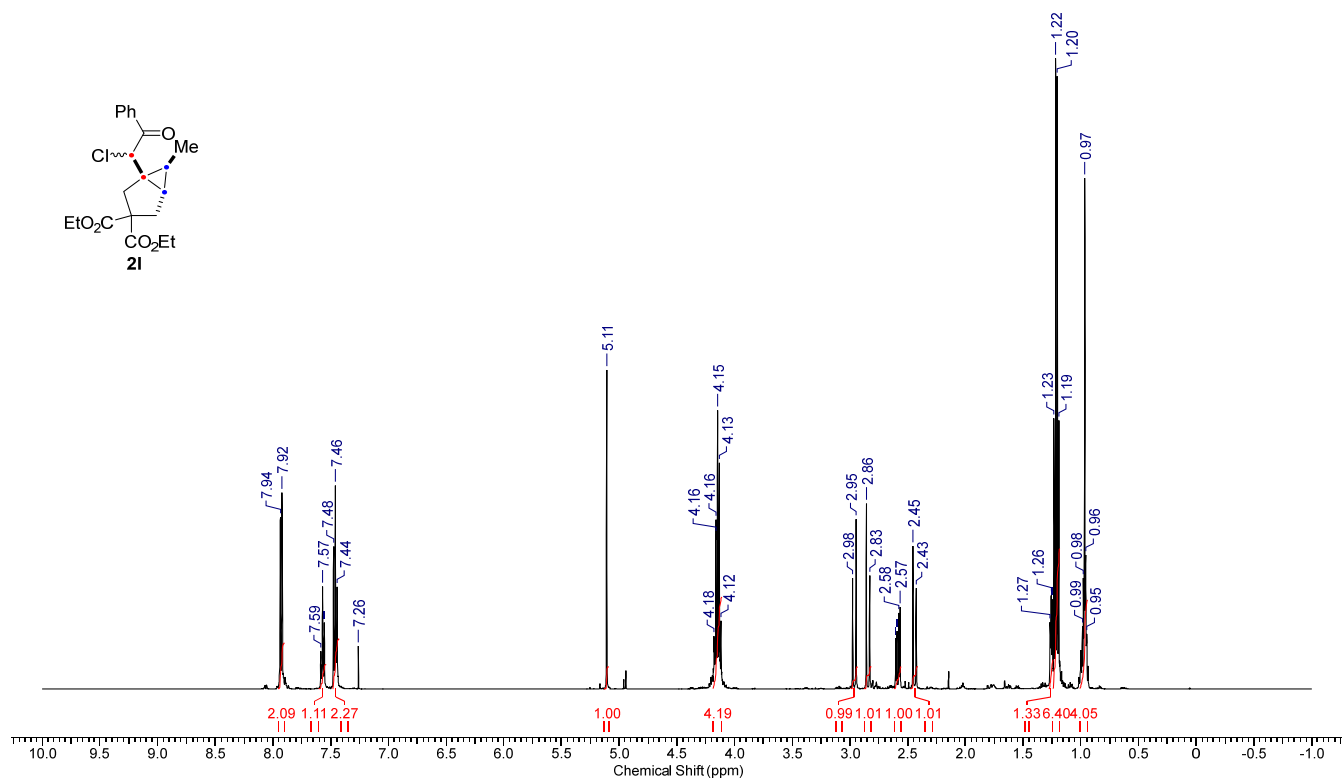

<sup>13</sup>C NMR (125 MHz, CDCl<sub>3</sub>) of **2I** (major epimer-rich)

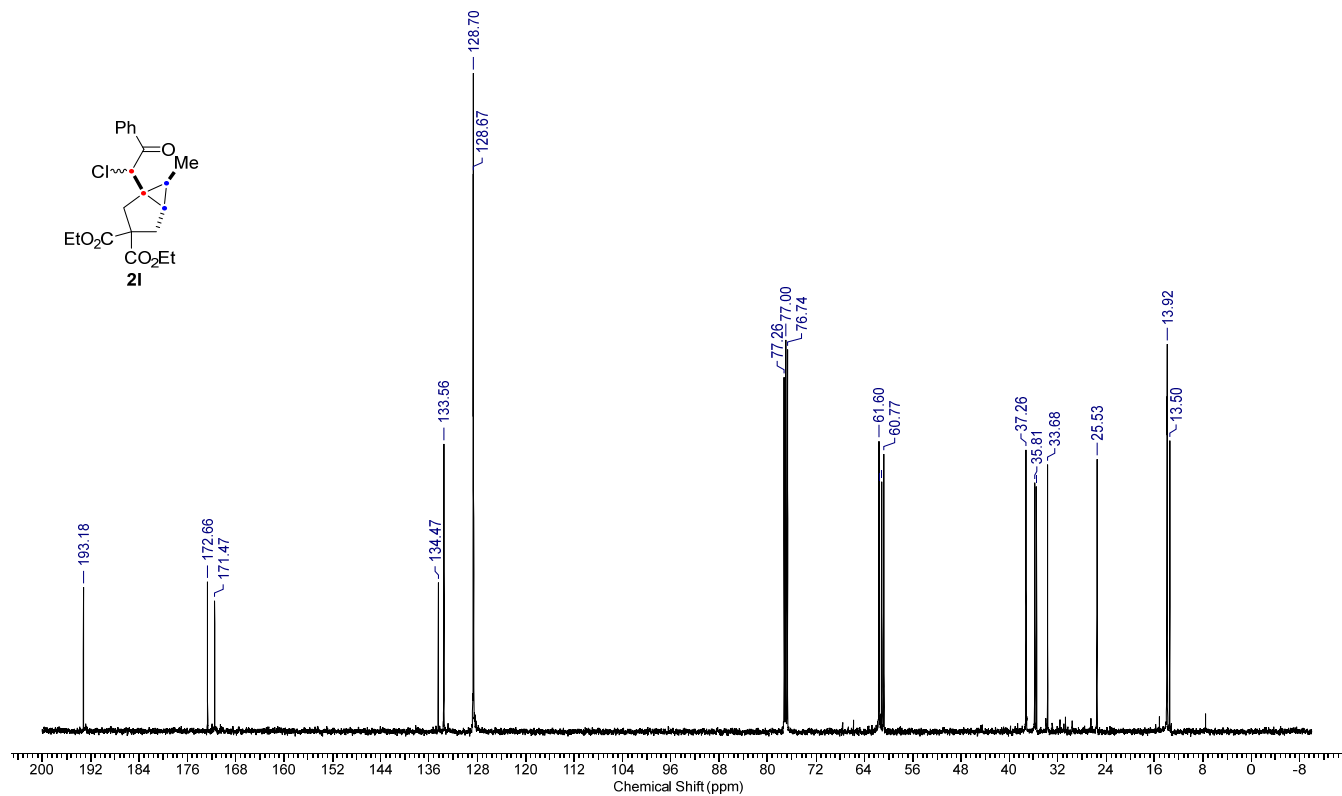

$^1\text{H}$  NMR (500 MHz,  $\text{CDCl}_3$ ) of **2I** (minor epimer-rich)

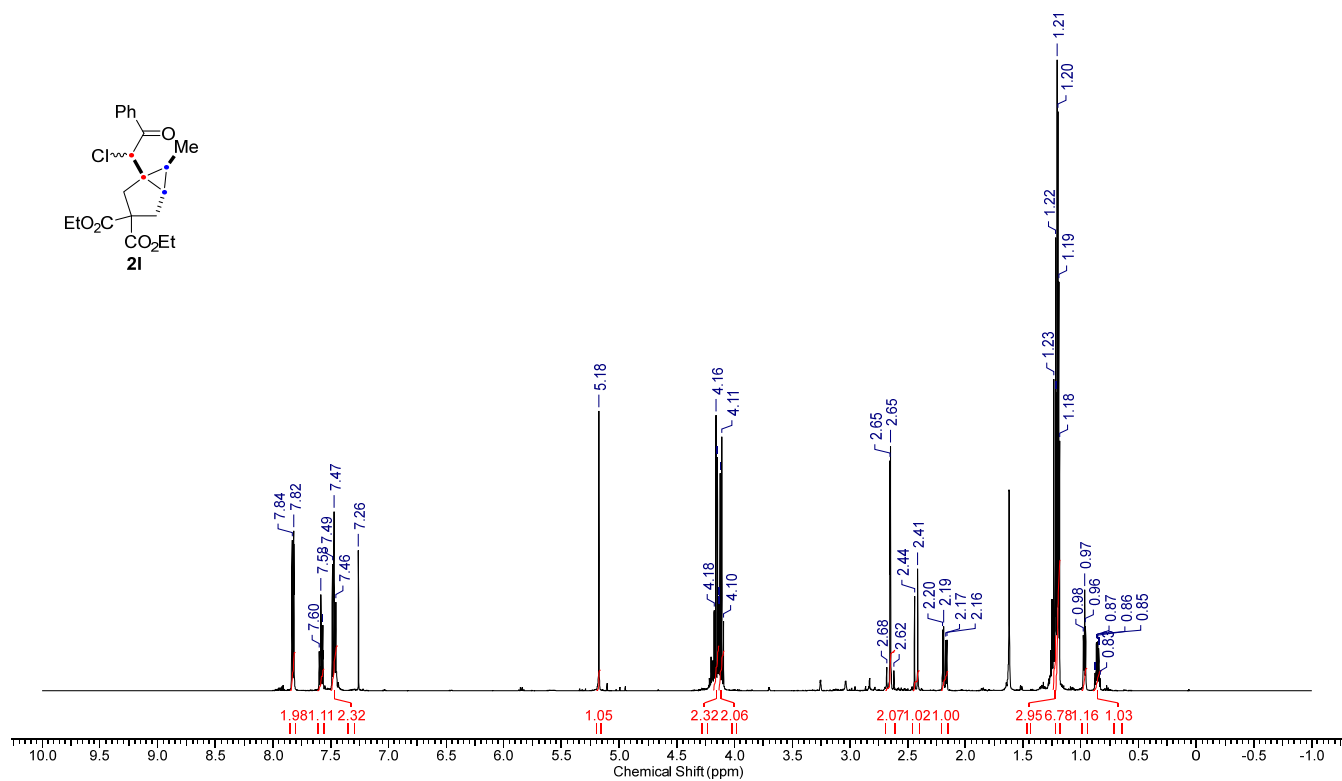

$^{13}\text{C}$  NMR (125 MHz,  $\text{CDCl}_3$ ) of **2I** (minor epimer-rich)

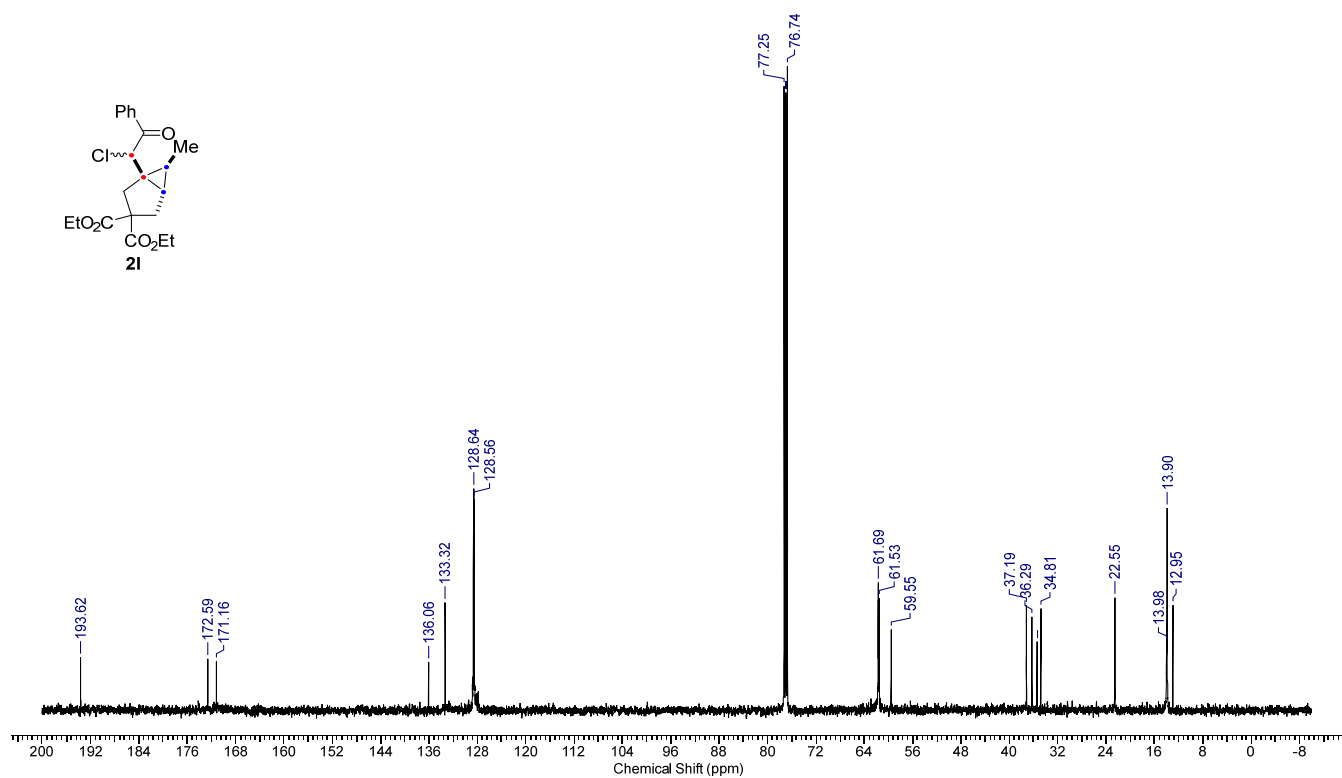

$^1\text{H}$  NMR (500 MHz,  $\text{CDCl}_3$ ) of *cis*-**2a** (major epimer-rich)

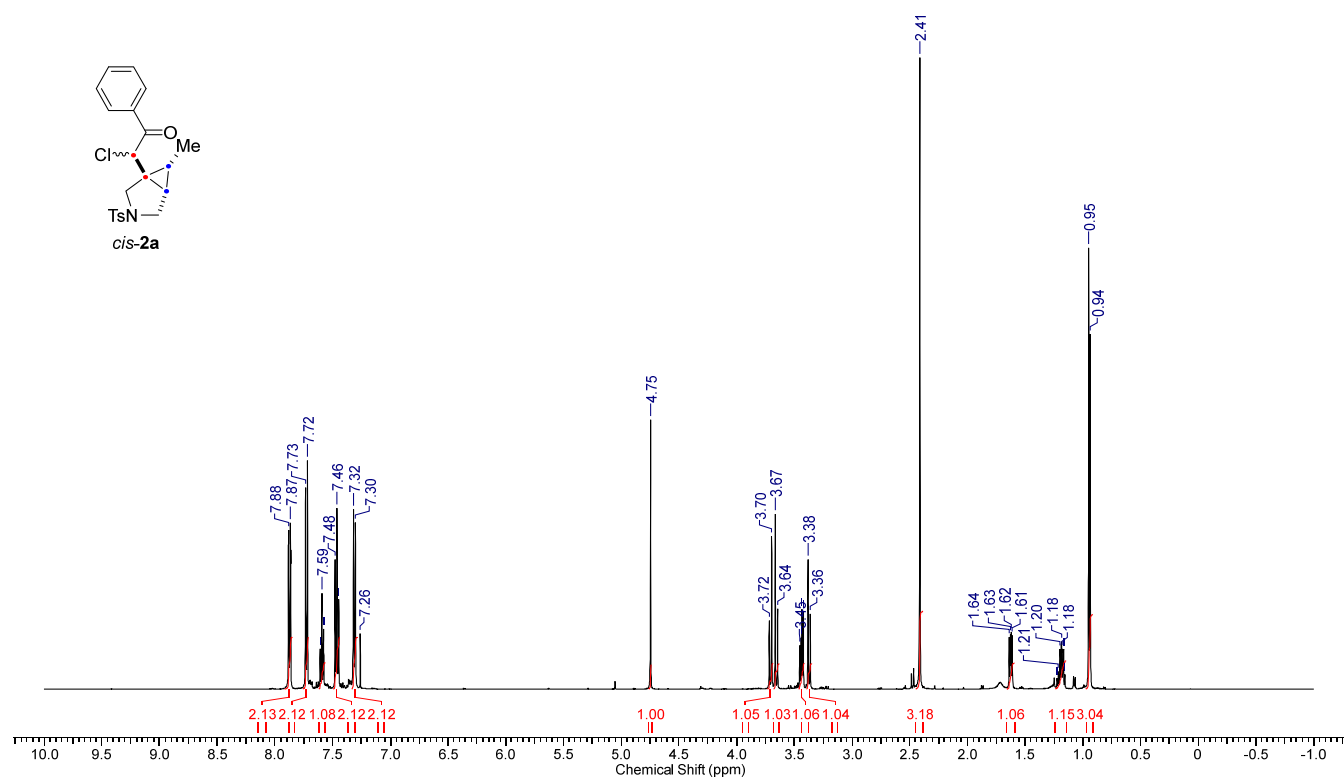

$^{13}\text{C}$  NMR (125 MHz,  $\text{CDCl}_3$ ) of *cis*-**2a** (major epimer-rich)

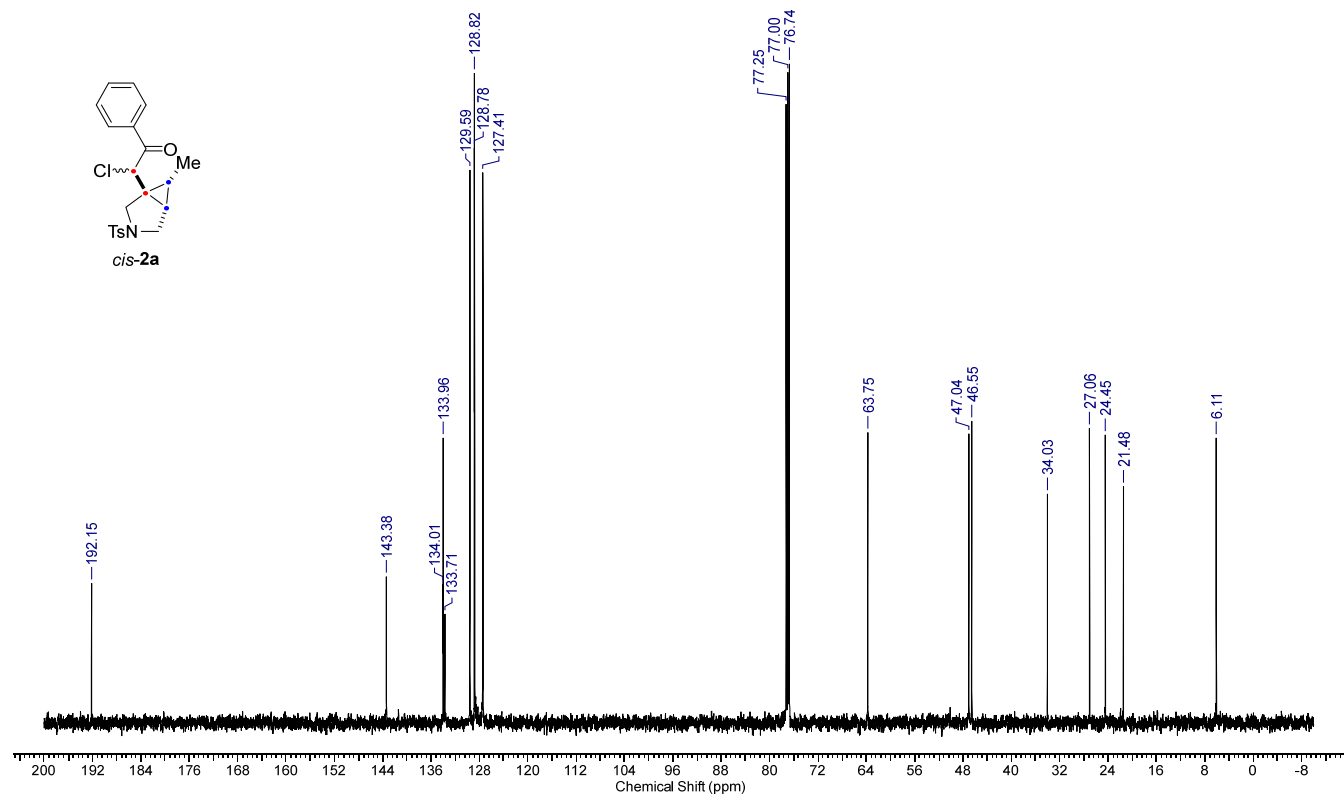

$^1\text{H}$  NMR (500 MHz,  $\text{CDCl}_3$ ) of *cis*-**2a** (minor epimer)

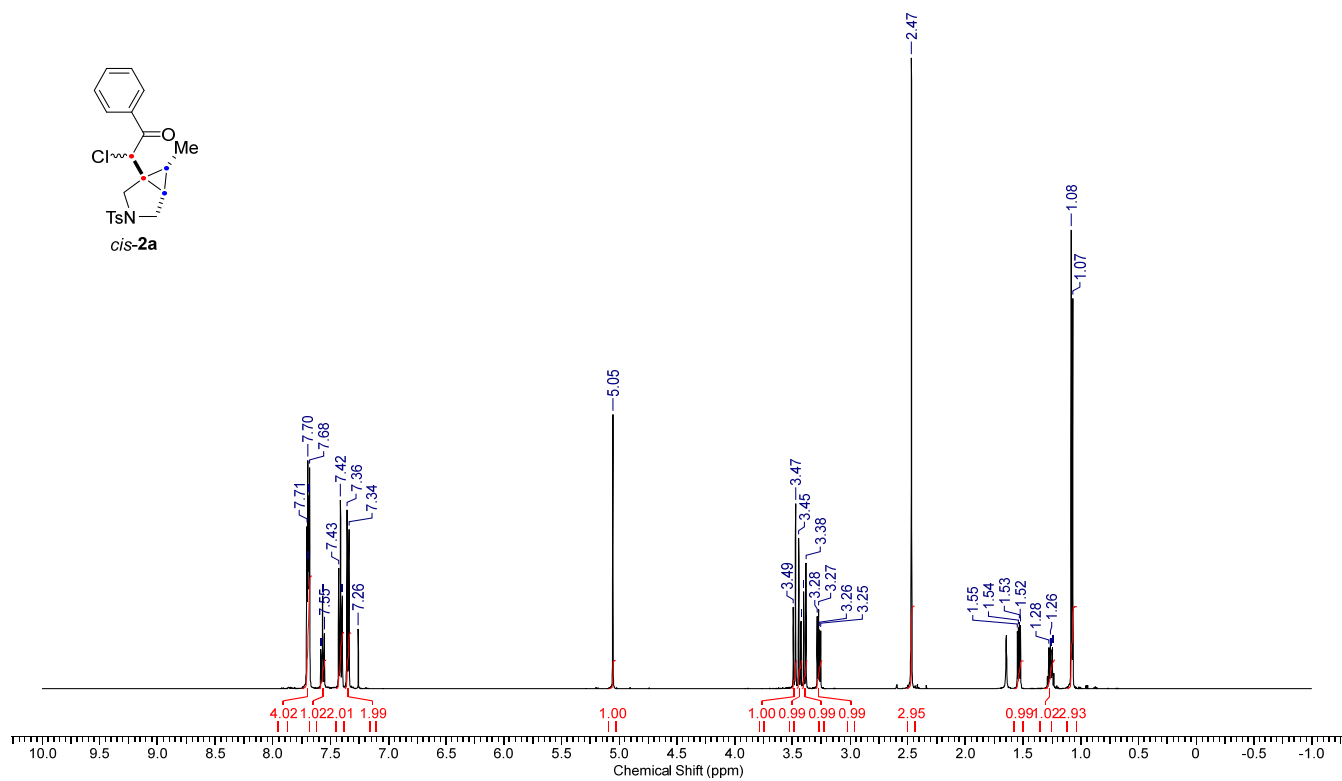

$^{13}\text{C}$  NMR (125 MHz,  $\text{CDCl}_3$ ) of *cis*-**2a** (minor epimer)

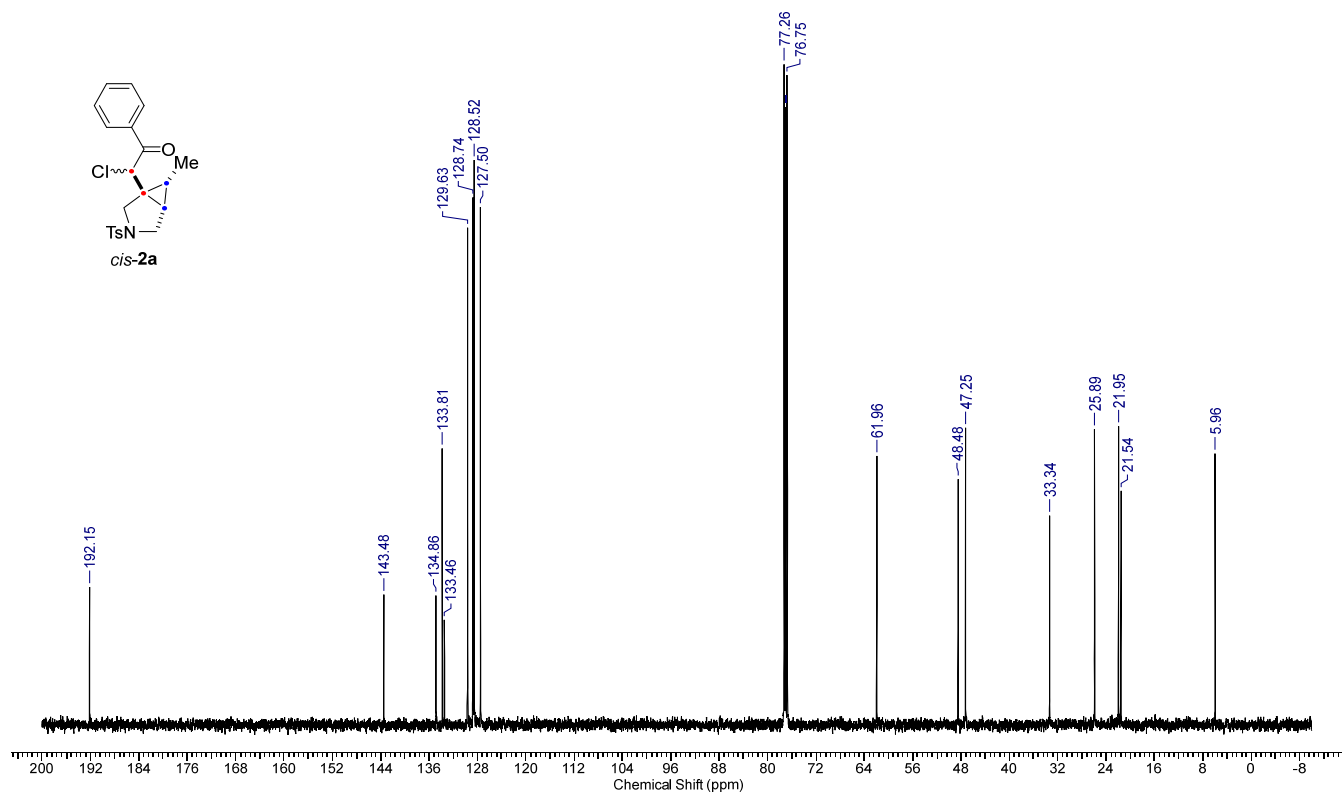



$^1\text{H}$  NMR (500 MHz,  $\text{CDCl}_3$ ) of **4m** (90:10 mixture of geometric isomers)

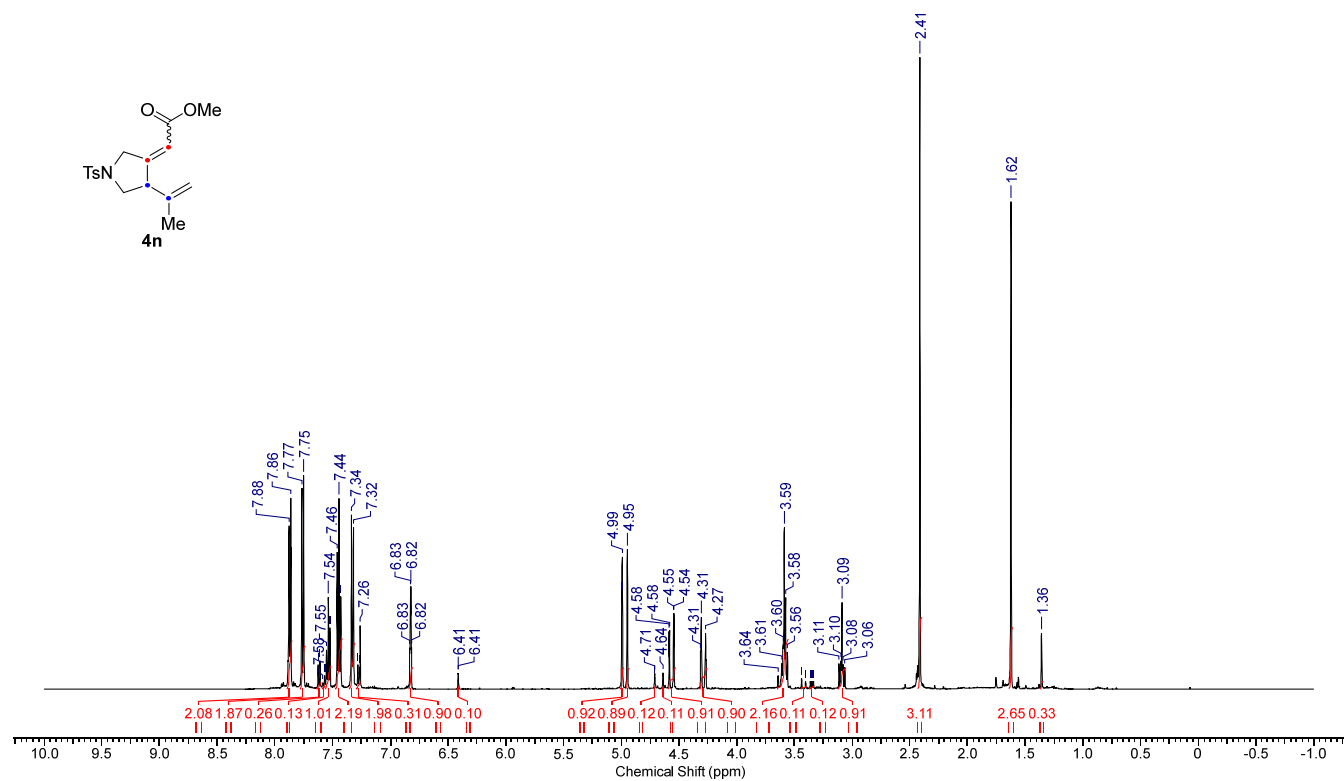

$^{13}\text{C}$  NMR (125 MHz,  $\text{CDCl}_3$ ) of **4m** (90:10 mixture of geometric isomers)

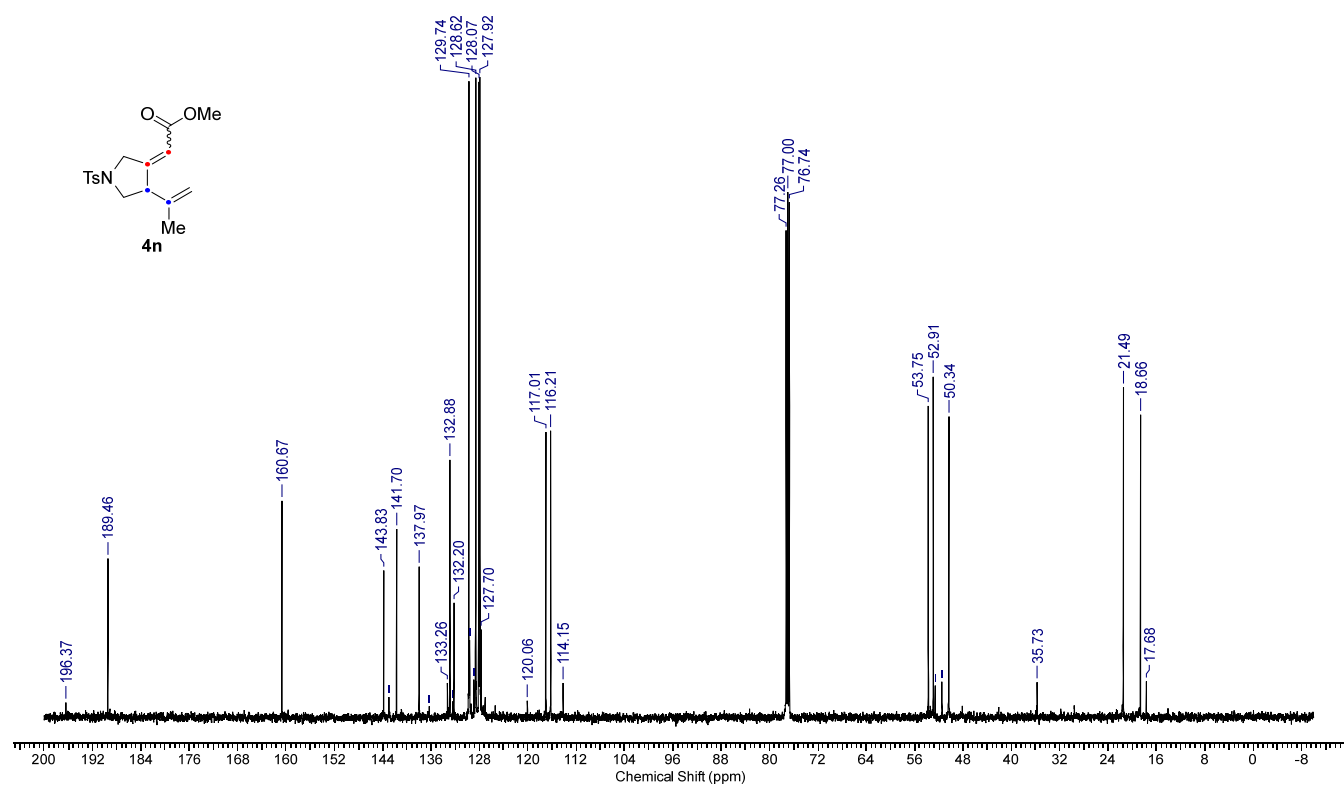

<sup>1</sup>H NMR (500 MHz, CDCl<sub>3</sub>) of **4n**

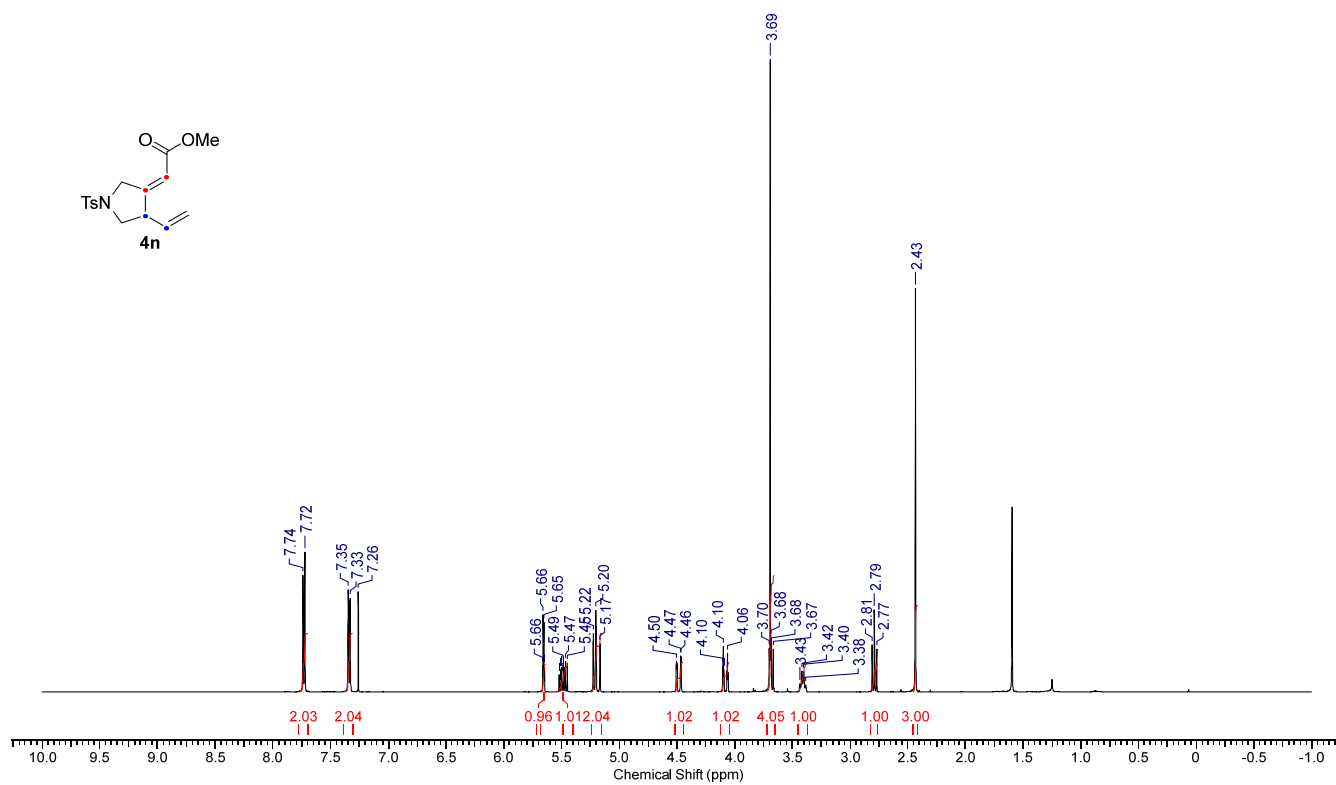

<sup>13</sup>C NMR (125 MHz, CDCl<sub>3</sub>) of **4n**

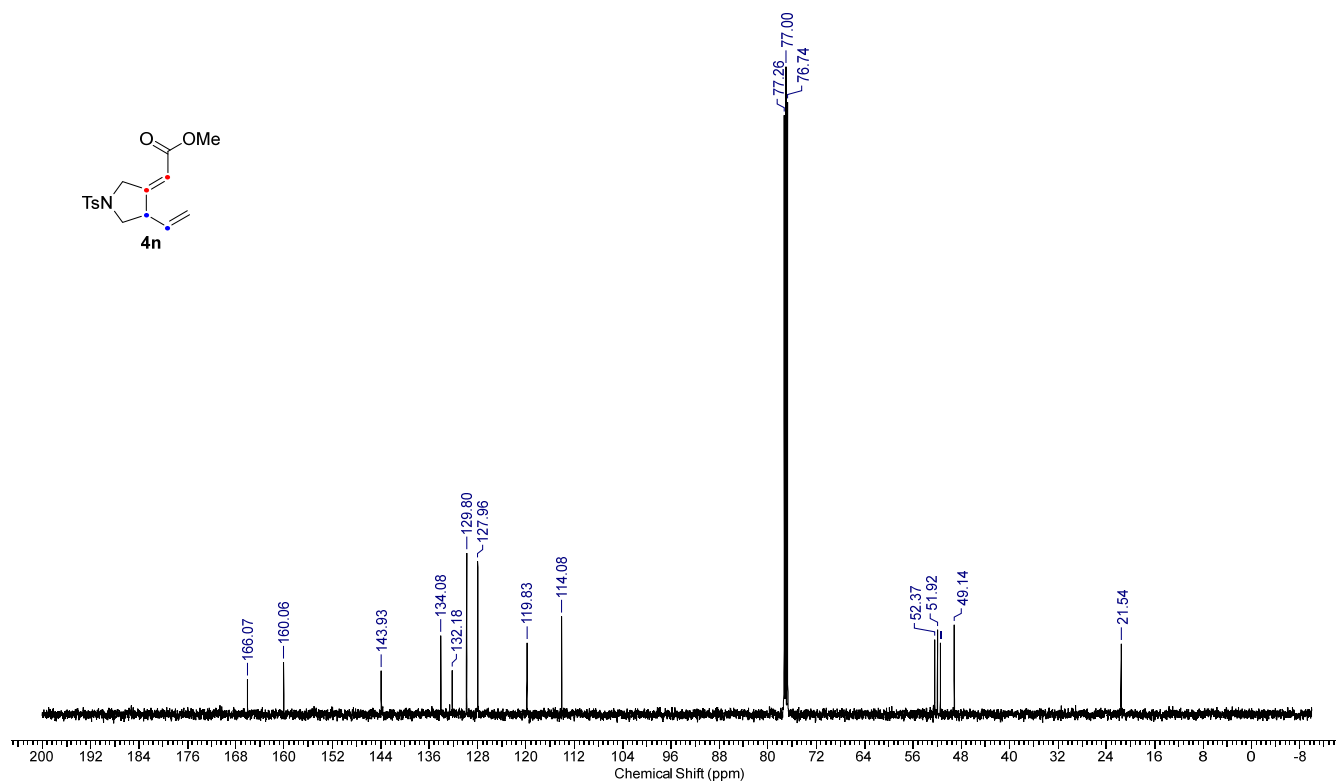

$^1\text{H}$  NMR (500 MHz,  $\text{CDCl}_3$ ) of **5** (50:50 mixture of epimers)

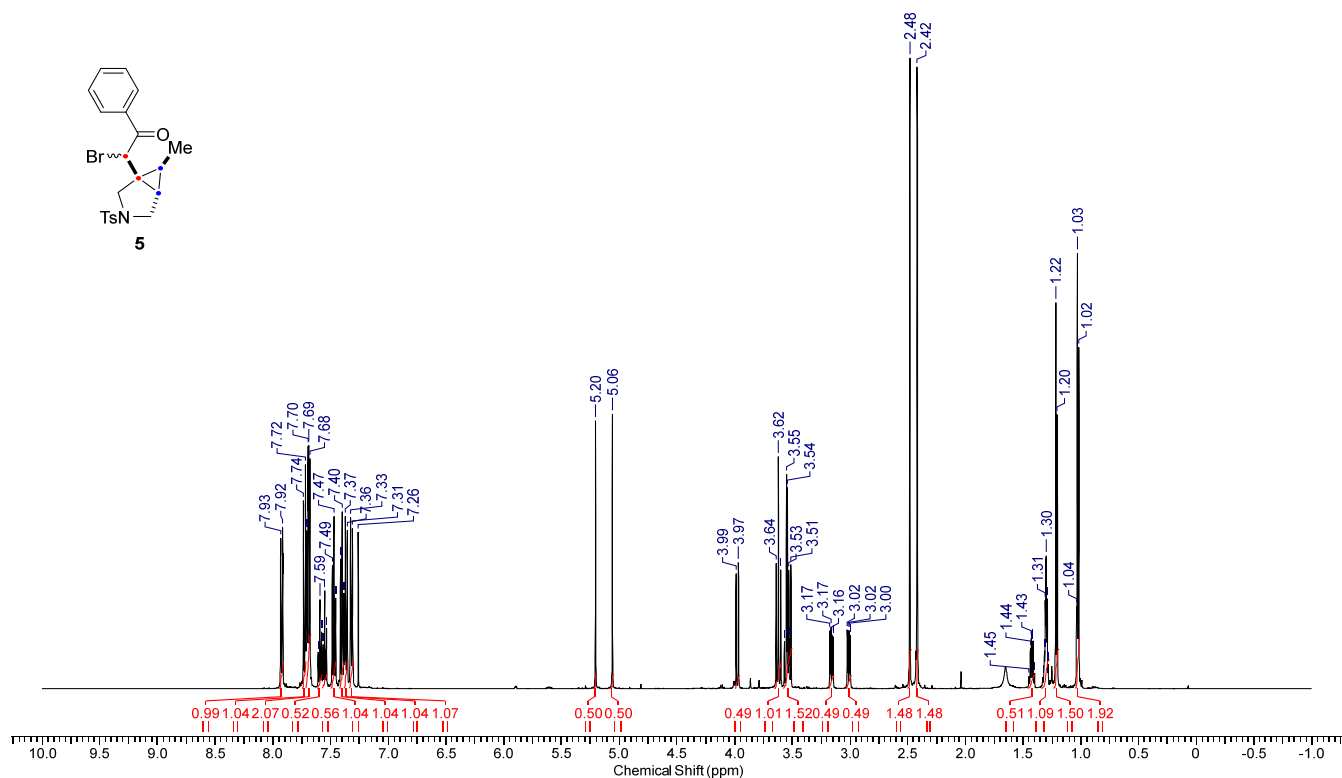

$^{13}\text{C}$  NMR (125 MHz,  $\text{CDCl}_3$ ) of **5** (50:50 mixture of epimers)

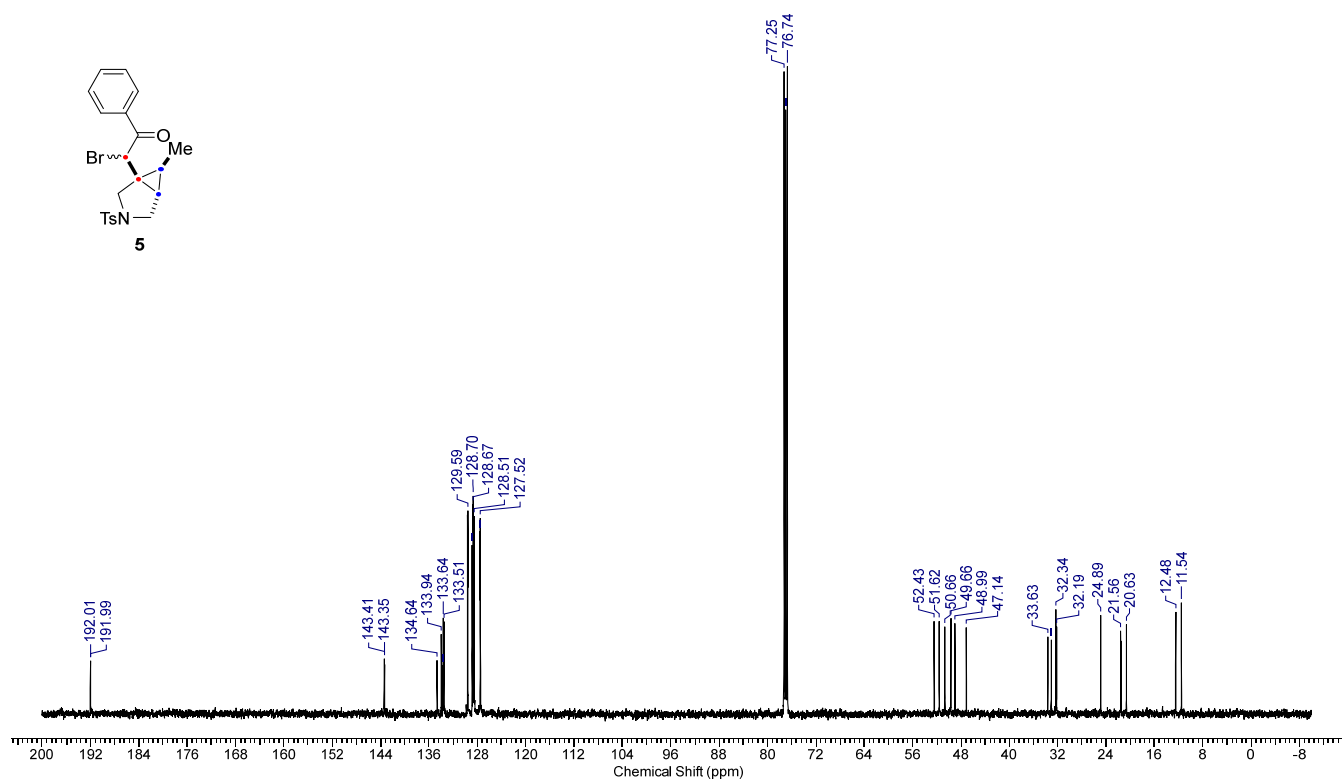

$^1\text{H}$  NMR (500 MHz,  $\text{CDCl}_3$ ) of **7**

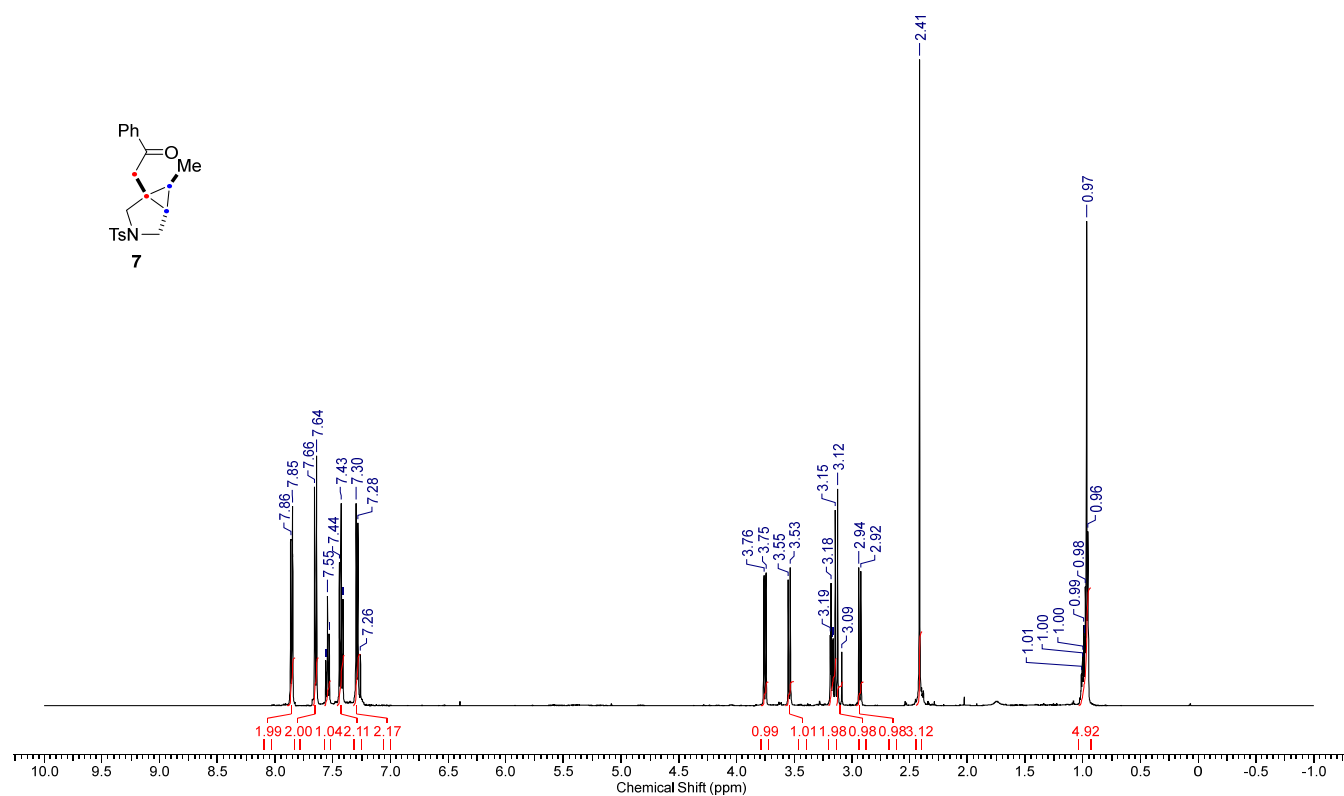

$^{13}\text{C}$  NMR (125 MHz,  $\text{CDCl}_3$ ) of **7**

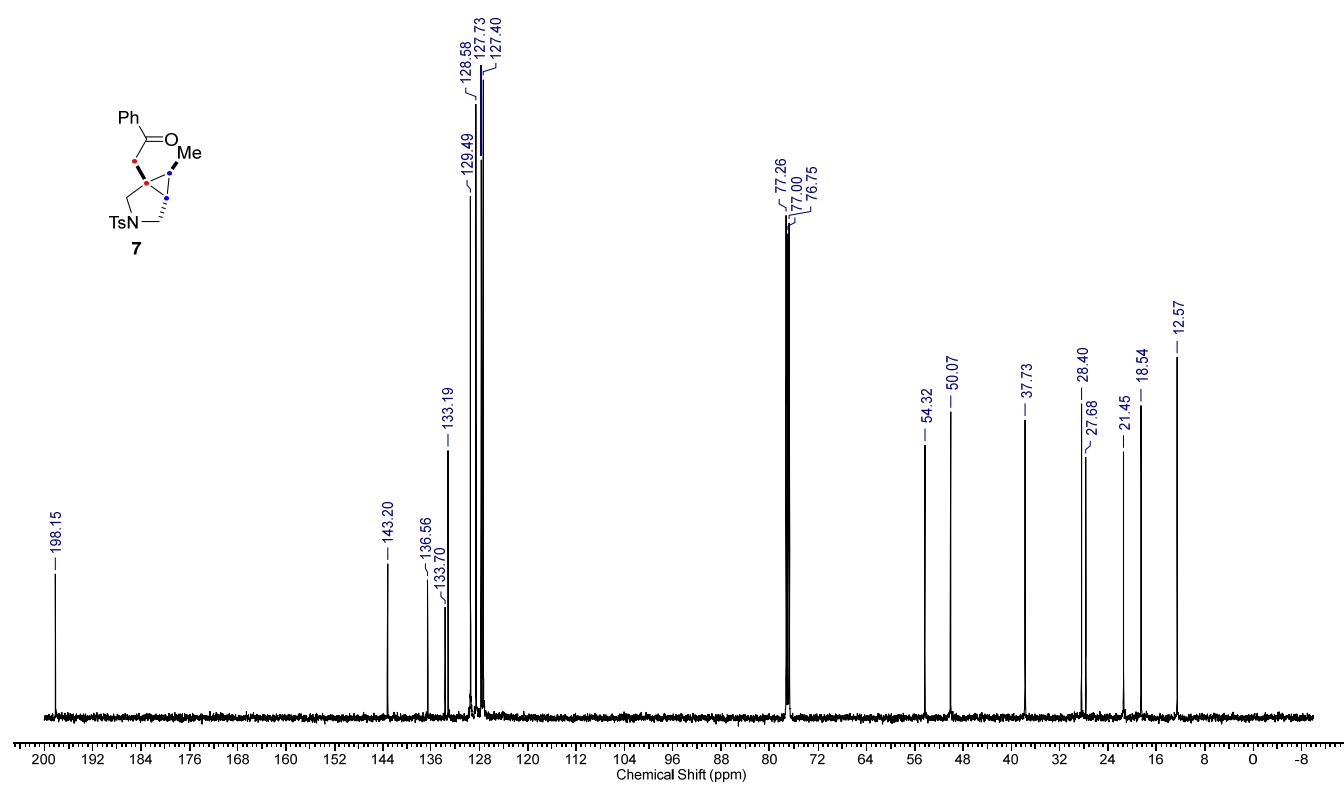

$^1\text{H}$  NMR (500 MHz,  $\text{CDCl}_3$ ) of **d-2a** (72:28 mixture of epimers)

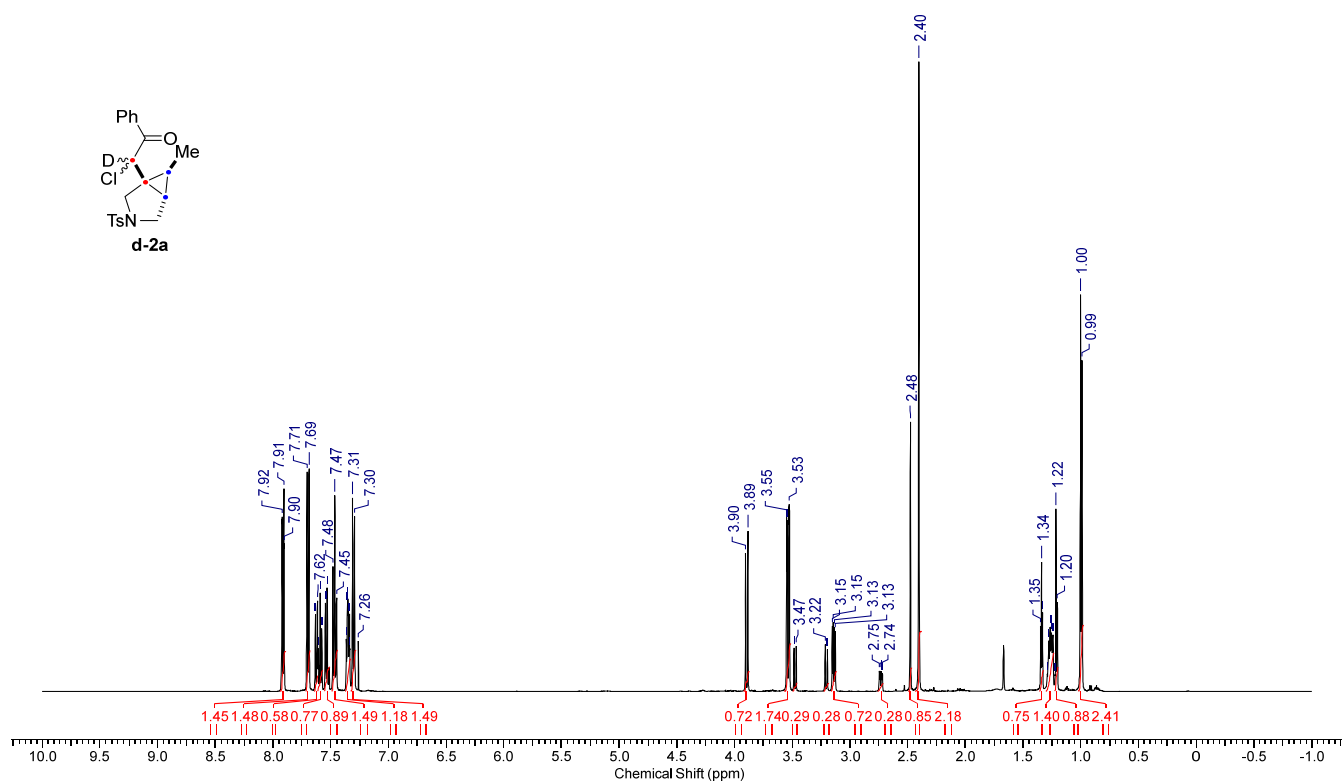

$^{13}\text{C}$  NMR (125 MHz,  $\text{CDCl}_3$ ) of **d-2a** (72:28 mixture of epimers)

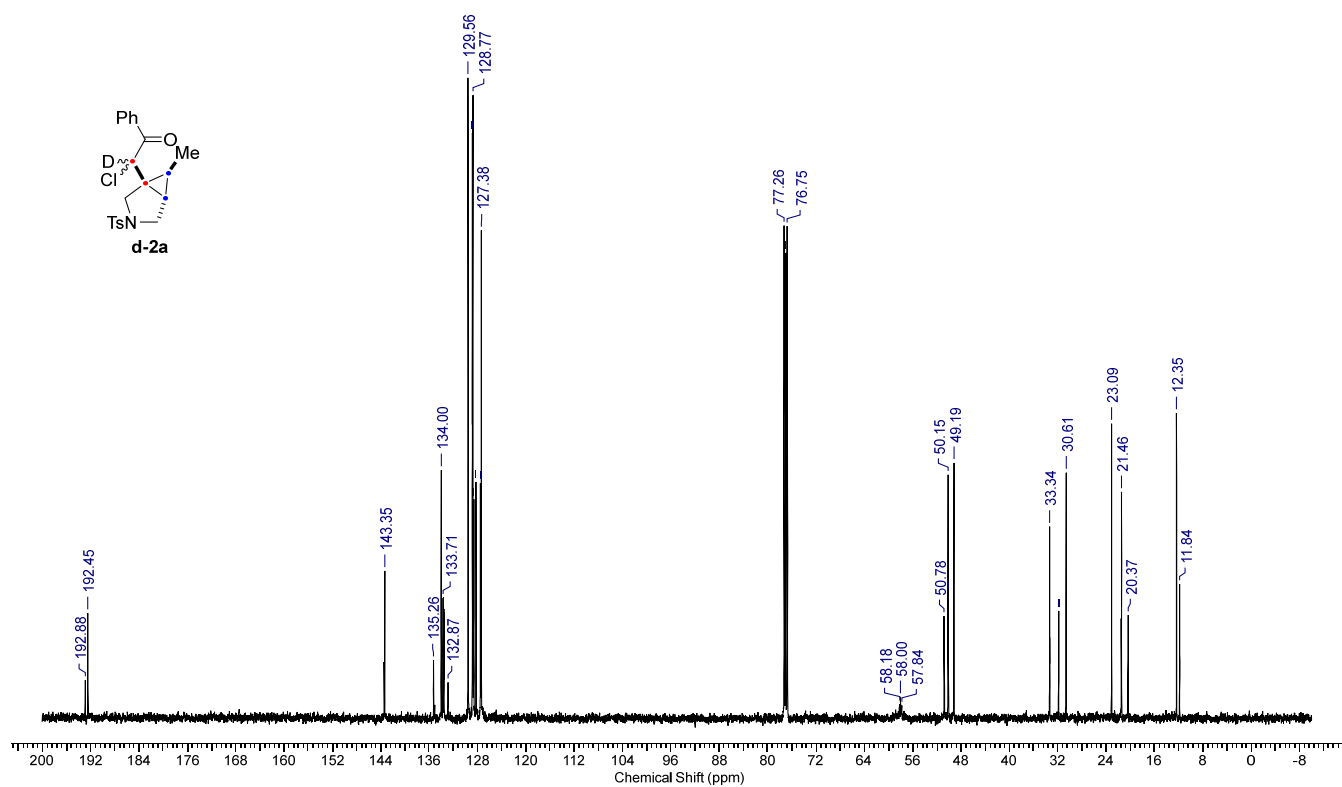

$^1\text{H}$  NMR (500 MHz,  $\text{CDCl}_3$ ) of **8**

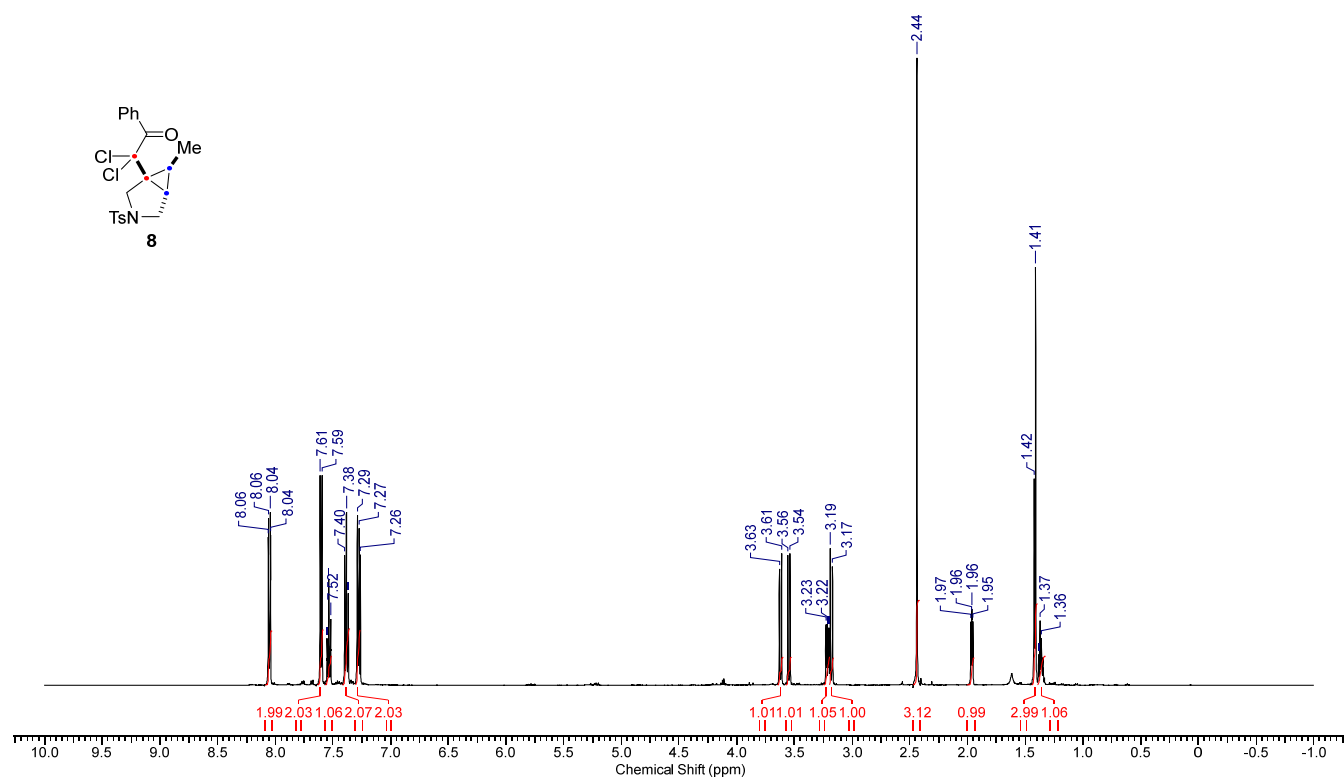

$^{13}\text{C}$  NMR (125 MHz,  $\text{CDCl}_3$ ) of **8**

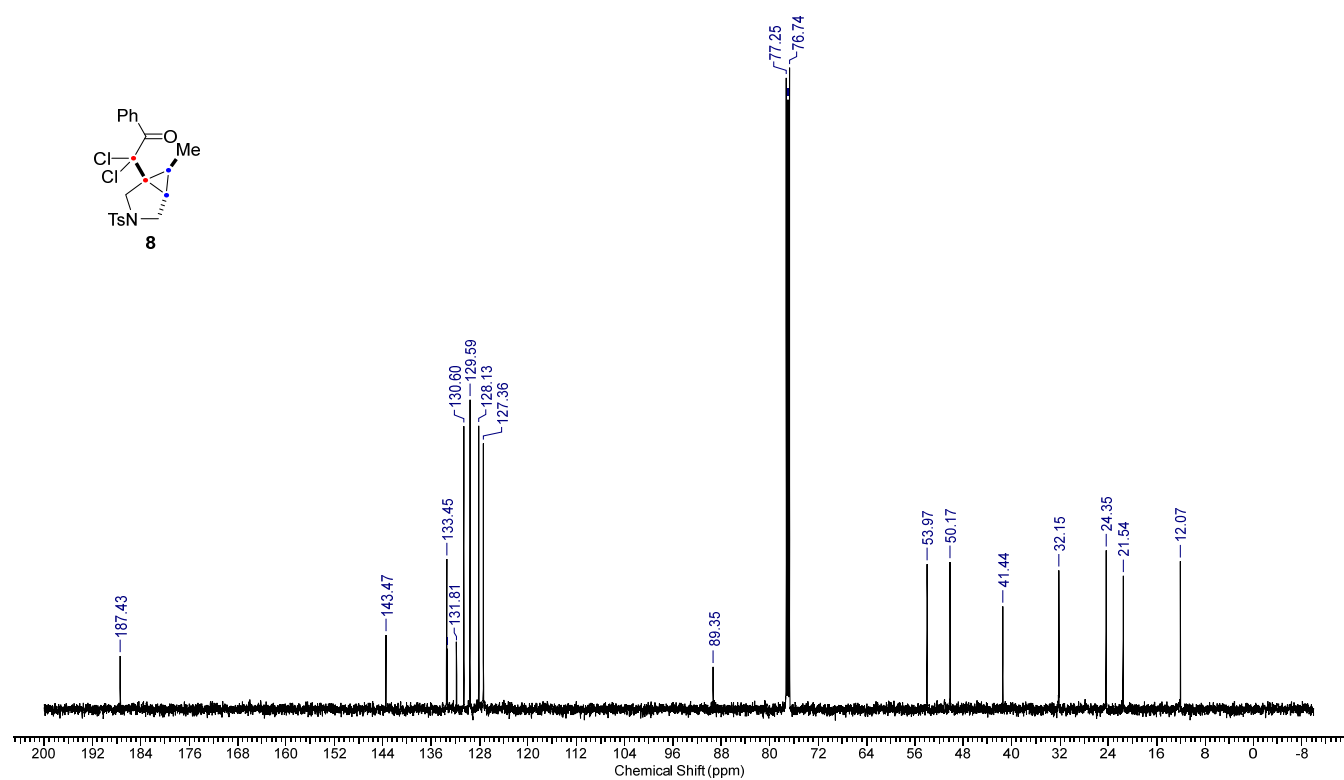

<sup>1</sup>H NMR (500 MHz, CDCl<sub>3</sub>) of **9**

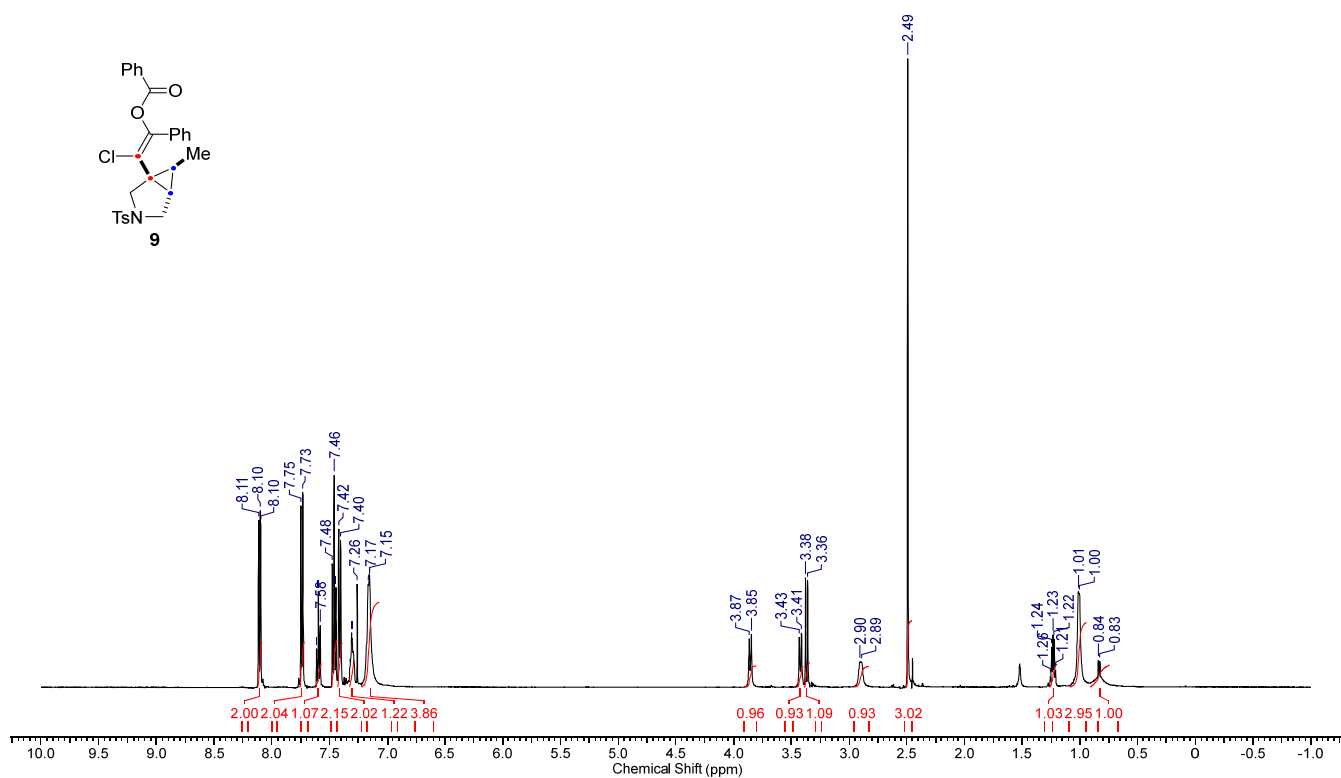

<sup>13</sup>C NMR (125 MHz, CDCl<sub>3</sub>) of **9**

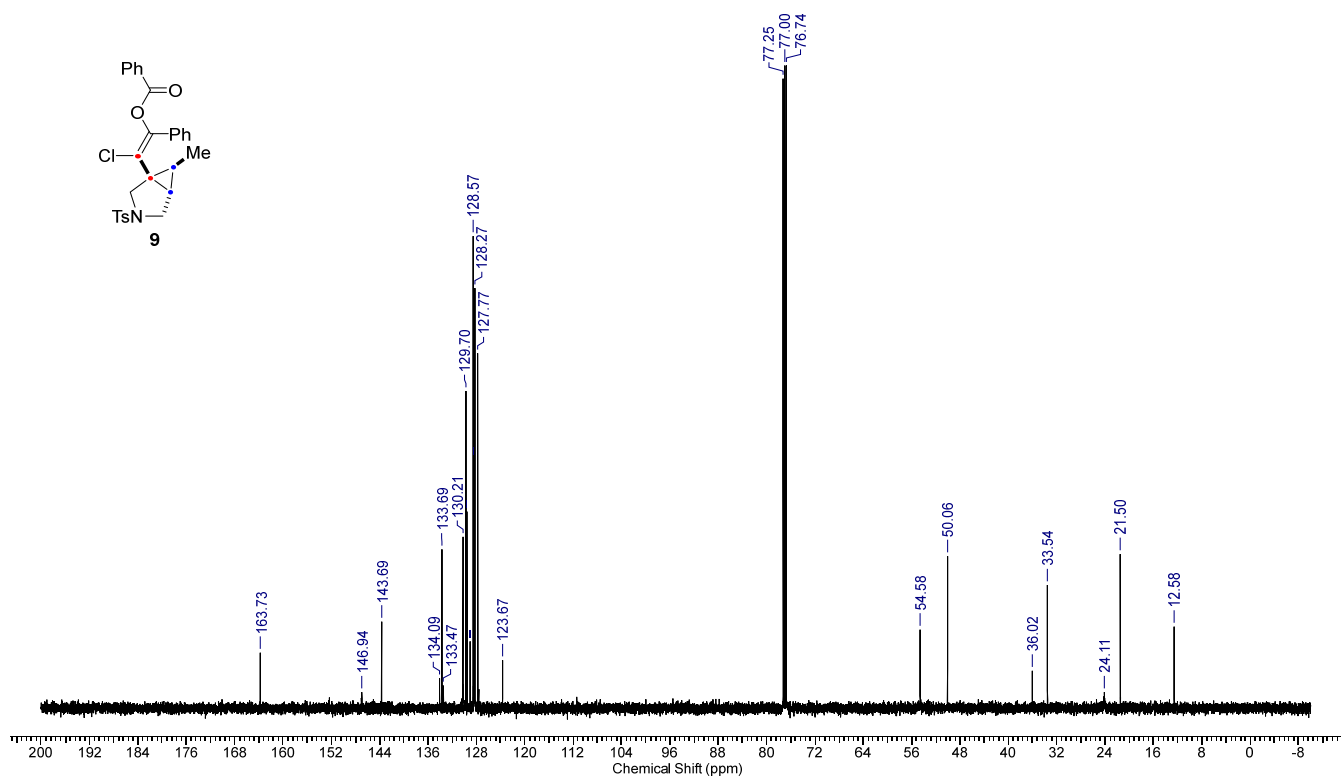

Supplement: d2qo01845d1.pdf [file d2qo01845d1.pdf]
